# Supplementary material for: FOCuS: a metaheuristic algorithm for computing knockouts from genome-scale models for strain optimization
Source: Royal Society of Chemistry journal article supplement (doi:10.1039/c7mb00204a), 2017-05-08
Supplement: c7mb00204a1.pdf [file c7mb00204a1.pdf]

### Supplementary Information

Table S1: Comparison of FOCuS with Reacknock flux distribution

Table S2: Size reduction of iAF1260 in case of acetate flux maximization. Computational time for each iteration have been mentioned.

Table S3: Size reduction of iMM904 in case of tyrosine flux maximization. Computational time for each iteration have been mentioned.
