# Supplementary material for: FOCuS: a metaheuristic algorithm for computing knockouts from genome-scale models for strain optimization
Source: Royal Society of Chemistry journal article supplement (doi:10.1039/c7mb00204a), 2017-05-08
Supplement: c7mb00204a2.xlsx [file c7mb00204a2.xlsx]

## Sheet: Sheet1
Reactions		Succinate			Lactate			Acetate			Glycolate			Formate
	Wildtype	Reacknock	FOCuS		Reacknock	FOCuS		Reacknock	FOCuS		Reacknock	FOCuS		Reacknock	FOCuS
'12DGR120tipp'	8.83844e-28	0	0	0	0	0		0	0		0	0		0	0
'12DGR140tipp'	0	0	0	0	0	0		0	0		0	0		0	0
'12DGR141tipp'	0	0	0	0	0	0		0	0		0	0		0	0
'12DGR160tipp'	0	0	0	0	0	0		0	0		0	0		0	0
'12DGR161tipp'	0	0	0	0	0	0		0	0		0	0		0	0
'12DGR180tipp'	0	0	0	0	0	0		0	0		0	0		0	0
'12DGR181tipp'	0	0	0	0	0	0		0	0		0	0		0	0
'12PPDRtex'	0	1.00044e-11	0	1.00044e-11	1.00044e-11	0		1.00044e-11	0		1.00044e-11	0		1.00044e-11	0
'12PPDRtpp'	0	1.00044e-11	0	1.00044e-11	1.00044e-11	0		1.00044e-11	0		1.00044e-11	0		1.00044e-11	0
'12PPDStex'	0	5.00222e-12	0	5.00222e-12	5.00222e-12	0		5.00222e-12	0		5.00222e-12	0		5.00222e-12	0
'12PPDStpp'	0	5.00222e-12	0	5.00222e-12	5.00222e-12	0		5.00222e-12	0		5.00222e-12	0		5.00222e-12	0
'14GLUCANabcpp'	0	5.00222e-12	0	5.00222e-12	5.00222e-12	0		5.00222e-12	0		5.00222e-12	0		5.00222e-12	0
'14GLUCANtexi'	0	0	0	0	0	0		0	0		0	0		0	0
'23CAMPtex'	0	-5.00832e-26	0	-5.00832e-26	-5.00832e-26	0		-5.00832e-26	0		-5.00832e-26	0		-5.00832e-26	0
'23CCMPtex'	0	-5.00832e-26	0	-5.00832e-26	-5.00832e-26	0		-5.00832e-26	0		-5.00832e-26	0		-5.00832e-26	0
'23CGMPtex'	0	-5.00832e-26	0	-5.00832e-26	-5.00832e-26	0		-5.00832e-26	0		-5.00832e-26	0		-5.00832e-26	0
'23CUMPtex'	0	-5.00832e-26	0	-5.00832e-26	-5.00832e-26	0		-5.00832e-26	0		-5.00832e-26	0		-5.00832e-26	0
'23DAPPAt2pp'	0	1.00044e-11	0	1.00044e-11	1.00044e-11	0		1.00044e-11	0		1.00044e-11	0		1.00044e-11	0
'23DAPPAtex'	0	-5.00832e-26	0	-5.00832e-26	-5.00832e-26	0		-5.00832e-26	0		-5.00832e-26	0		-5.00832e-26	0
'23PDE2pp'	0	1.00044e-11	0	1.00044e-11	1.00044e-11	0		1.00044e-11	0		1.00044e-11	0		1.00044e-11	0
'23PDE4pp'	0	1.00044e-11	0	1.00044e-11	1.00044e-11	0		1.00044e-11	0		1.00044e-11	0		1.00044e-11	0
'23PDE7pp'	0	1.00044e-11	0	1.00044e-11	1.00044e-11	0		1.00044e-11	0		1.00044e-11	0		1.00044e-11	0
'23PDE9pp'	0	1.00044e-11	0	1.00044e-11	1.00044e-11	0		1.00044e-11	0		1.00044e-11	0		1.00044e-11	0
'26DAHtex'	0	-5.00832e-26	0	-5.00832e-26	-5.00832e-26	0		-5.00832e-26	0		-5.00832e-26	0		-5.00832e-26	0
'2AGPA120tipp'	0	2.00089e-11	0	2.00089e-11	0	0		0	0		0	0		0	0
'2AGPA140tipp'	0	0	0	0	0	0		0	0		0	0		0	0
'2AGPA141tipp'	0	0	0	0	0	0		0	0		0	0		6.00267e-11	0
'2AGPA160tipp'	0	0	0	0	0	0		0	0		0	0		0	0
'2AGPA161tipp'	0	0	0	0	0	0		0	0		0	0		0	0
'2AGPA180tipp'	0	0	0	0	0	0		0	0		0	0		0	0
'2AGPA181tipp'	0	0	0	0	0	0		0	0		0	0		0	0
'2AGPE120tipp'	0	-2.00089e-11	0	-2.00089e-11	0	0		0	0		0	0		0	0
'2AGPE140tipp'	0	0	0	0	0	0		0	0		0	0		0	0
'2AGPE141tipp'	0	0	0	0	0	0		0	0		0	0		0	0
'2AGPE160tipp'	0	0	0	0	0	0		0	0		0	0		0	0
'2AGPE161tipp'	0	0	0	0	4.00178e-11	0		0	0		0	0		0	0
'2AGPE180tipp'	0	0	0	0	0	0		0	0		0	0		0	0
'2AGPE181tipp'	0	0	0	0	0	0		0	0		0	0		0	0
'2AGPEAT120'	0	0	0	0	0	0		0	0		0	0		0	0
'2AGPEAT140'	0	0	0	0	0	0		0	0		0	0		0	0
'2AGPEAT141'	0	0	0	0	0	0		0	0		0	0		0	0
'2AGPEAT160'	7.77355e-27	0	0	0	0	0		0	0		0	0		0	0
'2AGPEAT161'	0	0	0	0	4.00178e-11	0		0	0		0	0		0	0
'2AGPEAT180'	0	0	0	0	0	0		0	0		0	0		0	0
'2AGPEAT181'	0	0	0	0	0	0		0	0		0	0		0	0
'2AGPG120tipp'	0	0	0	0	0	0		0	0		0	0		0	0
'2AGPG140tipp'	0	0	0	0	0	0		0	0		0	0		0	0
'2AGPG141tipp'	0	0	0	0	0	0		0	0		0	0		0	0
'2AGPG160tipp'	0	0	0	0	0	0		0	0		0	0		0	0
'2AGPG161tipp'	0	0	0	0	0	0		0	0		0	0		0	0
'2AGPG180tipp'	0	0	0	0	0	0		0	0		0	0		0	0
'2AGPG181tipp'	0	0	0	0	0	0		0	0		0	0		0	0
'2AGPGAT120'	0	0	0	0	0	0		0	0		0	0		0	0
'2AGPGAT140'	0	0	0	0	0	0		0	0		0	0		0	0
'2AGPGAT141'	-1.653e-49	0	0	0	0	0		0	0		0	0		0	0
'2AGPGAT160'	-7.77556e-27	0	0	0	0	0		0	0		0	0		0	0
'2AGPGAT161'	4.78731e-28	0	0	0	0	0		0	0		0	0		0	0
'2AGPGAT180'	0	0	0	0	0	0		0	0		0	0		0	0
'2AGPGAT181'	0	0	0	0	0	0		0	0		0	0		0	0
'2DGLCNRx'	0	0	0	0	0	0		0	0		0	0		0	0
'2DGLCNRy'	0	0	0	0	0	0		0	0		0	0		0	0
'2DGULRx'	0	5.00222e-12	0	5.00222e-12	5.00222e-12	0		5.00222e-12	0		5.00222e-12	0		5.00222e-12	0
'2DGULRy'	0	5.00222e-12	0	5.00222e-12	5.00222e-12	0		5.00222e-12	0		5.00222e-12	0		5.00222e-12	0
'2MAHMP'	0	0	0	0	0	0		0	0		0	0		0	0
'34dhpactex'	0	-1.00044e-11	0	-1.00044e-11	-1.00044e-11	0		-1.00044e-11	0		-1.00044e-11	0		-1.00044e-11	0
'3AMPtex'	0	-1.50067e-11	0	-1.50067e-11	-1.50067e-11	0		-1.50067e-11	0		-1.50067e-11	0		-1.50067e-11	0
'3CMPtex'	0	-1.50067e-11	0	-1.50067e-11	-1.50067e-11	0		-1.50067e-11	0		-1.50067e-11	0		-1.50067e-11	0
'3GMPtex'	0	-1.50067e-11	0	-1.50067e-11	-1.50067e-11	0		-1.50067e-11	0		-1.50067e-11	0		-1.50067e-11	0
'3HAD100'	0.315122	0.0417515	0.0417515	2.48939e-09	0.0356459	0.0357796		0.0518538	0.0377941		0.0461657	0.0385225		0.0451999	0.0492068
'3HAD120'	0.181914	0.0241024	0.0241024	1.4544e-09	0.0205777	0.0206549		0.0299343	0.0218178		0.0266506	0.0222384		0.0260931	0.0284062
'3HAD121'	0.133208	0.0176491	0.0176491	1.065e-09	0.0150682	0.0151247		0.0219195	0.0159762		0.0195151	0.0162842		0.0191068	0.0208006
'3HAD140'	0.113017	0.0149739	0.0149739	9.03568e-10	0.0127842	0.0128321		0.0185971	0.0135546		0.016557	0.0138159		0.0162107	0.0176478
'3HAD141'	0.133208	0.0176491	0.0176491	1.065e-09	0.0150682	0.0151247		0.0219195	0.0159762		0.0195151	0.0162842		0.0191068	0.0208006
'3HAD160'	0.113017	0.0149739	0.0149739	9.03568e-10	0.0127842	0.0128321		0.0185971	0.0135546		0.016557	0.0138159		0.0162107	0.0176478
'3HAD161'	0.133208	0.0176491	0.0176491	1.065e-09	0.0150682	0.0151247		0.0219195	0.0159762		0.0195151	0.0162842		0.0191068	0.0208006
'3HAD180'	0	0	0	0	0	0		0	0		0	0		0	0
'3HAD181'	0	0	0	0	0	0		0	0		0	0		0	0
'3HAD40'	0.315122	0.0417515	0.0417515	2.48939e-09	0.0356459	0.0357796		0.0518538	0.0377941		0.0461657	0.0385225		0.0451999	0.0492068
'3HAD60'	0.315122	0.0417515	0.0417515	2.48939e-09	0.0356459	0.0357796		0.0518538	0.0377941		0.0461657	0.0385225		0.0451999	0.0492068
'3HAD80'	0.315122	0.0417515	0.0417515	2.48939e-09	0.0356459	0.0357796		0.0518538	0.0377941		0.0461657	0.0385225		0.0451999	0.0492068
'3HCINNMH'	0	1.00044e-11	0	1.00044e-11	1.00044e-11	0		1.00044e-11	0		1.00044e-11	0		1.00044e-11	0
'3HPPPNH'	0	1.00044e-11	0	1.00044e-11	1.00044e-11	0		1.00044e-11	0		1.00044e-11	0		1.00044e-11	0
'3KGK'	0	0	0	0	0	0		0	0		0	0		0	0
'3NTD2pp'	0	2.50111e-11	0	2.50111e-11	2.50111e-11	0		2.50111e-11	0		2.50111e-11	0		2.50111e-11	0
'3NTD4pp'	0	2.50111e-11	0	2.50111e-11	2.50111e-11	0		2.50111e-11	0		2.50111e-11	0		2.50111e-11	0
'3NTD7pp'	0	2.50111e-11	0	2.50111e-11	2.50111e-11	0		2.50111e-11	0		2.50111e-11	0		2.50111e-11	0
'3NTD9pp'	0	2.50111e-11	0	2.50111e-11	2.50111e-11	0		2.50111e-11	0		2.50111e-11	0		2.50111e-11	0
'3OAR100'	0.315122	0.0417515	0.0417515	2.48941e-09	0.0356459	0.0357796		0.0518538	0.0377941		0.0461657	0.0385225		0.0451999	0.0492068
'3OAR120'	0.181914	0.0241024	0.0241024	1.45442e-09	0.0205777	0.0206549		0.0299343	0.0218178		0.0266506	0.0222384		0.0260931	0.0284062
'3OAR121'	0.133208	0.0176491	0.0176491	1.065e-09	0.0150682	0.0151247		0.0219195	0.0159762		0.0195151	0.0162842		0.0191068	0.0208006
'3OAR140'	0.181914	0.0241024	0.0241024	1.45442e-09	0.0205777	0.0206549		0.0299343	0.0218178		0.0266506	0.0222384		0.0260931	0.0284062
'3OAR141'	0.133208	0.0176491	0.0176491	1.065e-09	0.0150682	0.0151247		0.0219195	0.0159762		0.0195151	0.0162842		0.0191068	0.0208006
'3OAR160'	0.113017	0.0149739	0.0149739	9.0357e-10	0.0127842	0.0128321		0.0185971	0.0135546		0.016557	0.0138159		0.0162107	0.0176478
'3OAR161'	0.133208	0.0176491	0.0176491	1.065e-09	0.0150682	0.0151247		0.0219195	0.0159762		0.0195151	0.0162842		0.0191068	0.0208006
'3OAR180'	0	0	0	0	0	0		0	0		0	0		0	0
'3OAR181'	0	0	0	0	0	0		0	0		0	0		0	0
'3OAR40'	0.315122	0.0417515	0.0417515	2.48941e-09	0.0356459	0.0357796		0.0518538	0.0377941		0.0461657	0.0385225		0.0451999	0.0492068
'3OAR60'	0.315122	0.0417515	0.0417515	2.48941e-09	0.0356459	0.0357796		0.0518538	0.0377941		0.0461657	0.0385225		0.0451999	0.0492068
'3OAR80'	0.315122	0.0417515	0.0417515	2.48941e-09	0.0356459	0.0357796		0.0518538	0.0377941		0.0461657	0.0385225		0.0451999	0.0492068
'3OAS100'	0.315122	0.0417515	0.0417515	2.48939e-09	0.0356459	0.0357796		0.0518538	0.0377941		0.0461657	0.0385225		0.0451999	0.0492068
'3OAS120'	0.181914	0.0241024	0.0241024	1.4544e-09	0.0205777	0.0206549		0.0299343	0.0218178		0.0266506	0.0222384		0.0260931	0.0284062
'3OAS121'	0.133208	0.0176491	0.0176491	1.065e-09	0.0150682	0.0151247		0.0219195	0.0159762		0.0195151	0.0162842		0.0191068	0.0208006
'3OAS140'	0.181914	0.0241024	0.0241024	1.4544e-09	0.0205777	0.0206549		0.0299343	0.0218178		0.0266506	0.0222384		0.0260931	0.0284062
'3OAS141'	0.133208	0.0176491	0.0176491	1.065e-09	0.0150682	0.0151247		0.0219195	0.0159762		0.0195151	0.0162842		0.0191068	0.0208006
'3OAS160'	0.113017	0.0149739	0.0149739	9.03568e-10	0.0127842	0.0128321		0.0185971	0.0135546		0.016557	0.0138159		0.0162107	0.0176478
'3OAS161'	0.133208	0.0176491	0.0176491	1.065e-09	0.0150682	0.0151247		0.0219195	0.0159762		0.0195151	0.0162842		0.0191068	0.0208006
'3OAS180'	0	0	0	0	0	0		0	0		0	0		0	0
'3OAS181'	0	0	0	0	0	0		0	0		0	0		0	0
'3OAS60'	0.315122	0.0417515	0.0417515	2.48939e-09	0.0356459	0.0357796		0.0518538	0.0377941		0.0461657	0.0385225		0.0451999	0.0492068
'3OAS80'	0.315122	0.0417515	0.0417515	2.48939e-09	0.0356459	0.0357796		0.0518538	0.0377941		0.0461657	0.0385225		0.0451999	0.0492068
'3PEPTabcpp'	0	1.00044e-11	0	1.00044e-11	1.00044e-11	0		1.00044e-11	0		1.00044e-11	0		1.00044e-11	0
'3PEPTtex'	0	1.00044e-11	0	1.00044e-11	1.00044e-11	0		1.00044e-11	0		1.00044e-11	0		1.00044e-11	0
'3UMPtex'	0	-1.50067e-11	0	-1.50067e-11	-1.50067e-11	0		-1.50067e-11	0		-1.50067e-11	0		-1.50067e-11	0
'42A12BOOXpp'	0	1.00044e-11	0	1.00044e-11	1.00044e-11	0		1.00044e-11	0		1.00044e-11	0		1.00044e-11	0
'4HOXPACDtex'	0	-1.00044e-11	0	-1.00044e-11	-1.00044e-11	0		-1.00044e-11	0		-1.00044e-11	0		-1.00044e-11	0
'4HTHRS'	0	0	0	0	0	0		0	0		0	0		0	0
'4PCP'	0	0	0	0	2.45174e-09	0		0	0		0	0		0	0
'4PCPpp'	0	0	0	0	0	0		0	0		0	0		0	0
'4PEPTabcpp'	0	0	0	0	0	0		0	0		0	0		0	0
'4PEPTtex'	0	1.00044e-11	0	1.00044e-11	1.00044e-11	0		1.00044e-11	0		1.00044e-11	0		1.00044e-11	0
'5DGLCNR'	0	7.00311e-11	0	7.00311e-11	7.00311e-11	0		7.00311e-11	0		7.00311e-11	0		7.00311e-11	0
'5DGLCNt2rpp'	0	3.00133e-11	0	3.00133e-11	3.00133e-11	0		3.00133e-11	0		3.00133e-11	0		3.00133e-11	0
'5DGLCNtex'	0	3.00133e-11	0	3.00133e-11	3.00133e-11	0		3.00133e-11	0		3.00133e-11	0		3.00133e-11	0
'5DOAN'	0	0	0	0	4.46776e-05	4.48451e-05		0	0		0	0		0	0
'A5PISO'	0.0344487	0.00456423	0.00456423	2.75366e-10	0.00389677	0.00391138		0.0056686	0.0041316		0.00504677	0.00421124		0.0049412	0.00537923
'AACPS1'	0	0	0	0	0	0		0	0		-1.20053e-10	0		0	0
'AACPS2'	0	0	0	0	0	0		0	0		0	0		0	0
'AACPS3'	0	0	0	0	0	0		0	0		0	0		0	0
'AACPS4'	0	0	0	0	-3.98802e-11	0		0	0		0	0		0	0
'AACPS5'	0	0	0	0	0	0		0	0		0	0		0	0
'AACPS6'	0	0	0	0	0	0		0	0		0	0		0	0
'AACPS7'	0	0	0	0	0	0		0	0		0	0		0	0
'AACPS8'	0	3.00133e-11	0	3.00133e-11	3.00133e-11	0		3.00133e-11	0		3.00133e-11	0		3.00133e-11	0
'AACPS9'	0	0	0	0	0	0		0	0		0	0		0	0
'AACTOOR'	0	0	0	0	0	0		0	0		0	0		0	0
'AADDGT'	0	0	0	0	0	0		0	0		0	0		0	0
'AAMYL'	0	5.00222e-12	0	5.00222e-12	5.00222e-12	0		5.00222e-12	0		5.00222e-12	0		5.00222e-12	0
'AAMYLpp'	0	5.00222e-12	0	5.00222e-12	5.00222e-12	0		5.00222e-12	0		5.00222e-12	0		5.00222e-12	0
'AB6PGH'	0	0	0	0	0	0		0	0		0	0		0	0
'ABTA'	0	4.00178e-11	0	4.00178e-11	4.00178e-11	0		4.00178e-11	0		4.00178e-11	0		4.00178e-11	0
'ABUTD'	0	3.00133e-11	0	3.00133e-11	3.00133e-11	0		3.00133e-11	0		3.00133e-11	0		3.00133e-11	0
'ABUTt2pp'	1.11371e-13	1000	0	1000	0	0		0	0		0	0		999.999	0
'ABUTtex'	0	1.00044e-11	0	1.00044e-11	1.00044e-11	0		1.00044e-11	0		1.00044e-11	0		1.00044e-11	0
'ACACCT'	0	1.00044e-11	0	1.00044e-11	1.00044e-11	0		1.00044e-11	0		1.00044e-11	0		1.00044e-11	0
'ACACT1r'	-8.87856e-28	-4.00178e-11	0	-4.00178e-11	128.858	0		999.912	0		999.912	0		999.876	0
'ACACt2pp'	0	1.00044e-11	0	1.00044e-11	1.00044e-11	0		1.00044e-11	0		1.00044e-11	0		1.00044e-11	0
'ACACtex'	0	-1.00044e-11	0	-1.00044e-11	-1.00044e-11	0		-1.00044e-11	0		-1.00044e-11	0		-1.00044e-11	0
'ACALD'	5.24896e-23	2.00089e-10	0	2.00089e-10	2.00089e-10	0		14.8106	15.0158		0.215448	0		0	-6.76753
'ACALDtex'	0	3.00133e-11	0	3.00133e-11	3.00133e-11	0		3.00133e-11	0		3.00133e-11	0		3.00133e-11	0
'ACALDtpp'	0	3.00133e-11	0	3.00133e-11	3.00133e-11	0		3.00133e-11	0		3.00133e-11	0		3.00133e-11	0
'ACANTHAT'	0	0	0	0	0	0		0	0		0	0		0	0
'ACBIPGT'	0	0	0	0	0	0		0	0		0	0		0	0
'ACCOAC'	2.13695	0.283132	0.283132	1.69649e-08	0.241728	0.242634		0.351639	0.256295		0.313066	0.261235		0.306517	0.333689
'ACCOAL'	1000	0	1000	-1000	0	1000		0	0		1000	1000		0	1000
'ACGAL1PPpp'	0	2.50111e-11	0	2.50111e-11	2.50111e-11	0		2.50111e-11	0		2.50111e-11	0		2.50111e-11	0
'ACGAL1Ptex'	0	-1.50067e-11	0	-1.50067e-11	-1.50067e-11	0		-1.50067e-11	0		-1.50067e-11	0		-1.50067e-11	0
'ACGALtex'	0	-3.00133e-11	0	-3.00133e-11	-3.00133e-11	0		-3.00133e-11	0		-3.00133e-11	0		-3.00133e-11	0
'ACGAM1PPpp'	0	2.50111e-11	0	2.50111e-11	2.50111e-11	0		2.50111e-11	0		2.50111e-11	0		2.50111e-11	0
'ACGAM1Ptex'	0	-1.50067e-11	0	-1.50067e-11	-1.50067e-11	0		-1.50067e-11	0		-1.50067e-11	0		-1.50067e-11	0
'ACGAMK'	-2.66048e-28	0	0	0	2.45174e-09	0		-1.00044e-11	0		0	0		0	0
'ACGAMT'	0	0	0	0	0	0		0	0		0	0		0	0
'ACGAptspp'	0	4.00178e-11	0	4.00178e-11	4.00178e-11	0		4.00178e-11	0		4.00178e-11	0		4.00178e-11	0
'ACGAtex'	0	-3.00133e-11	0	-3.00133e-11	-3.00133e-11	0		-3.00133e-11	0		-3.00133e-11	0		-3.00133e-11	0
'ACGK'	0.261952	0.0347069	0.0347069	2.0743e-09	0.0296315	0.0297426		0.0431046	0.0314172		0.0383762	0.0320227		0.0375734	0.0409043
'ACGS'	0.261952	0.0347069	0.0347069	2.0743e-09	0.0296315	0.0297426		0.0431046	0.0314172		0.0383762	0.0320227		0.0375734	0.0409043
'ACHBS'	0.257258	0.034085	0.034085	2.04678e-09	0.0291005	0.0292097		0.0423323	0.0308542		0.0376886	0.0314489		0.0369002	0.0401714
'ACKr'	-1.16135	0.0681703	0.0681703	3.99859e-09	-999.629	0.0584195		-22.6423	-23.4665		0.0753775	0.0628981		0.0738007	0.080343
'ACLS'	0.774234	0.102581	0.102581	6.17009e-09	0.0875797	0.0879081		0.127401	0.0928576		0.113426	0.0946474		0.111053	0.120898
'ACM6PH'	-2.66023e-28	5.00222e-12	0	5.00222e-12	2.45674e-09	0		-5.00222e-12	0		5.00222e-12	0		5.00222e-12	0
'ACMAMUT'	0	0	0	0	0	0		0	0		0	0		0	0
'ACMANAptspp'	0	1.00044e-11	0	1.00044e-11	1.00044e-11	0		1.00044e-11	0		1.00044e-11	0		1.00044e-11	0
'ACMANAtex'	0	-5.00832e-26	0	-5.00832e-26	-5.00832e-26	0		-5.00832e-26	0		-5.00832e-26	0		-5.00832e-26	0
'ACMUMptspp'	0	5.00222e-12	0	5.00222e-12	5.00222e-12	0		5.00222e-12	0		5.00222e-12	0		5.00222e-12	0
'ACMUMtex'	0	0	0	0	0	0		0	0		0	0		0	0
'ACNAMt2pp'	0	1.00044e-11	0	1.00044e-11	1.00044e-11	0		1.00044e-11	0		1.00044e-11	0		1.00044e-11	0
'ACNAMtex'	0	-5.00832e-26	0	-5.00832e-26	-5.00832e-26	0		-5.00832e-26	0		-5.00832e-26	0		-5.00832e-26	0
'ACNML'	0	1.00044e-11	0	1.00044e-11	1.00044e-11	0		1.00044e-11	0		1.00044e-11	0		1.00044e-11	0
'ACOAD1f'	8.87869e-28	3.00133e-11	0	3.00133e-11	3.00133e-11	0		3.00133e-11	0		3.00133e-11	0		3.00133e-11	0
'ACOAD2f'	8.87866e-28	0	0	0	0	0		0	0		0	0		0	0
'ACOAD3f'	0	-1.00044e-11	0	-1.00044e-11	-1.00044e-11	0		-1.00044e-11	0		-1.00044e-11	0		-1.00044e-11	0
'ACOAD4f'	1.72845e-30	-2.00089e-11	0	-2.00089e-11	-2.00089e-11	0		-2.00089e-11	0		-2.00089e-11	0		-2.00089e-11	0
'ACOAD5f'	-1.77331e-27	0	0	0	0	0		0	0		0	0		0	0
'ACOAD6f'	-3.57361e-30	0	0	0	0	0		0	0		1.20053e-10	0		0	0
'ACOAD7f'	0	0	0	0	0	0		0	0		0	0		0	0
'ACOAD8f'	0	0	0	0	0	0		0	0		0	0		0	0
'ACOATA'	0.315122	0	0	0	0	0		0	0		0.0461657	0		0.0451999	0
'ACODA'	0.261952	0.0347069	0.0347069	2.0743e-09	0.0296315	0.0297426		0.0431046	0.0314172		0.0383762	0.0320227		0.0375734	0.0409043
'ACOLIPAtex'	0	0	0	0	0	0		0	0		0	0		0	0
'ACONIs'	0	0	0	0	0	0		0	0		0	0		0	0
'ACONMT'	0	0	0	0	0	0		0	0		0	0		0	0
'ACONTa'	4.34236	8.39151	8.39151	2.49209e-07	0.107719	0.108123		0.170631	0.11421		18.4071	18.485		0.615523	0.558077
'ACONTb'	4.34236	8.39151	8.39151	2.49209e-07	0.107719	0.108123		0.170631	0.11421		18.4071	18.485		0.615523	0.558077
'ACOTA'	-0.261952	-0.0347069	-0.0347069	-2.07425e-09	-0.0296315	-0.0297426		-0.0431046	-0.0314172		-0.0383762	-0.0320227		-0.0375734	-0.0409043
'ACPS1'	0	0	0	0	0	0		0	0		0	0		0	0
'ACS'	0	0	0	0	999.688	0		0	0		0	0		0	0
'ACSERtex'	0	0	0	0	0	0		0	0		0	0		0	0
'ACSERtpp'	0	0	0	0	0	0		0	0		0	0		0	0
'ACt2rpp'	-1.67586	-1000	-1000	1.00044e-11	1.00044e-11	0		-22.727	-23.5282		-0.000614565	0		1.00044e-11	0
'ACt4pp'	0	1000	1000	0	0	0		0	0		0.000614565	0		0	0
'ACtex'	-1.67586	1.00044e-11	0	1.00044e-11	1.00044e-11	0		-22.727	-23.5282		1.00044e-11	0		1.00044e-11	0
'ADA'	0	0	0	0	0	0		0	0		0	0		0	0
'ADCL'	0.000592447	7.84953e-05	7.84953e-05	4.73662e-12	6.70164e-05	6.72677e-05		9.74882e-05	7.1055e-05		8.67941e-05	7.24246e-05		8.49785e-05	9.25117e-05
'ADCS'	0.000592447	7.84953e-05	7.84953e-05	4.73662e-12	6.70164e-05	6.72677e-05		9.74882e-05	7.1055e-05		8.67941e-05	7.24246e-05		8.49785e-05	9.25117e-05
'ADD'	0	0	0	0	0	0		0	0		0	0		0	0
'ADEt2rpp'	0	3.00133e-11	0	3.00133e-11	3.00133e-11	0		3.00133e-11	0		3.00133e-11	0		3.00133e-11	0
'ADEtex'	0	3.00133e-11	0	3.00133e-11	3.00133e-11	0		3.00133e-11	0		3.00133e-11	0		3.00133e-11	0
'ADK1'	2.00531	0.265691	1000	-999.734	-1000	1000		1000	1000		0.29378	1000		1000	1000
'ADK3'	-1000	-1000	-1000	0	999.915	-999.772		-1000	-1000		-1000	-999.347		-999.712	-999.575
'ADK4'	0	0	0	0	0	0		0	0		0	0		0	0
'ADMDC'	0	-1.00044e-11	0	-1.00044e-11	-1.00044e-11	0		-1.00044e-11	0		-1.00044e-11	0		-1.00044e-11	0
'ADNCYC'	0	0	0	0	0	0		0	0		0	0		0	0
'ADNK1'	0	0	5.23302e-05	-5.23302e-05	0	0		6.49923e-05	4.737e-05		0	0		5.66525e-05	0
'ADNUC'	0	0	0	0	0	0		0	0		0	0		0	0
'ADNt2pp'	1000	0	1000	-1000	0	1000		0	1000		0	0		0	1000
'ADNt2rpp'	-1000	1.20053e-10	-1000	1000	1.20053e-10	-1000		1.20053e-10	-1000		1.20053e-10	0		1.20053e-10	-1000
'ADNtex'	0	8.50378e-11	0	8.50378e-11	8.50378e-11	0		8.50378e-11	0		8.50378e-11	0		8.50378e-11	0
'ADOCBIK'	0	5.00222e-12	0	5.00222e-12	5.00222e-12	0		5.00222e-12	0		5.00222e-12	0		5.00222e-12	0
'ADOCBLS'	0	0	0	0	0	0		0	0		0	0		0	0
'ADOCBLabcpp'	0	5.00222e-12	0	5.00222e-12	5.00222e-12	0		5.00222e-12	0		5.00222e-12	0		5.00222e-12	0
'ADOCBLtonex'	0	0	0	0	0	0		0	0		0	0		0	0
'ADPRDP'	0	0	0	0	0	0		0	0		0	0		0	0
'ADPT'	0.000394965	5.23304e-05	0	5.23304e-05	8.93553e-05	8.96902e-05		0	0		5.78629e-05	4.82831e-05		0	6.16745e-05
'ADSK'	0.218118	0.0288992	0.0288992	1.46383e-09	0.024673	0.0247656		0.0358917	0.0261599		0.0319545	0.0266642		0.0312861	0.0340595
'ADSL1r'	0.264086	0.0349897	0.0349897	1.94086e-09	0.0298729	0.0299849		0.0434558	0.0316731		0.0386889	0.0322836		0.0378796	0.0412376
'ADSL2r'	0.395589	0.0524129	0.0524129	2.67217e-09	0.0447482	0.044916		0.0650949	0.0474449		0.0579542	0.0483594		0.0567419	0.061772
'ADSS'	0.264086	0.0349897	0.0349897	1.94091e-09	0.0298729	0.0299849		0.0434558	0.0316731		0.0386889	0.0322836		0.0378796	0.0412376
'AGDC'	-5.32107e-28	6.50289e-11	0	6.50289e-11	4.96851e-09	0		4.502e-11	0		6.50289e-11	0		6.50289e-11	0
'AGM3PA'	-2.66062e-28	0	0	0	0	0		0	0		0	0		0	0
'AGM3PApp'	0	0	0	0	0	0		0	0		0	0		0	0
'AGM3PH'	0	0	0	0	0	0		-1.00044e-11	0		0	0		0	0
'AGM3Pt2pp'	-2.66072e-28	0	0	0	0	0		-1.00044e-11	0		0	0		0	0
'AGM4PA'	0	0	0	0	2.45174e-09	0		0	0		0	0		0	0
'AGM4PApp'	0	-1.00044e-11	0	-1.00044e-11	-1.00044e-11	0		-1.00044e-11	0		-1.00044e-11	0		-1.00044e-11	0
'AGM4PCP'	0	0	0	0	0	0		0	0		0	0		0	0
'AGM4PCPpp'	0	0	0	0	0	0		0	0		0	0		0	0
'AGM4PH'	0	0	0	0	0	0		0	0		0	0		0	0
'AGM4Pt2pp'	0	0	0	0	2.45174e-09	0		0	0		0	0		0	0
'AGMH'	-2.66062e-28	0	0	0	2.45174e-09	0		0	0		0	0		0	0
'AGMHE'	0	0	0	0	0	0		8.00355e-11	0		8.00355e-11	0		0	0
'AGMT'	0	1.00044e-11	0	1.00044e-11	1.00044e-11	0		1.00044e-11	0		1.00044e-11	0		1.00044e-11	0
'AGMt2pp'	0	0	0	0	0	0		0	0		0	0		0	0
'AGMtex'	0	1.00044e-11	0	1.00044e-11	1.00044e-11	0		1.00044e-11	0		1.00044e-11	0		1.00044e-11	0
'AGPAT120'	-8.8384e-28	0	0	0	0	0		0	0		0	0		0	0
'AGPAT140'	-1.78386e-30	0	0	0	0	0		0	0		0	0		0	0
'AGPAT141'	7.94537e-34	0	0	0	0	0		0	0		-5.97721e-11	0		0	0
'AGPAT160'	0.0565083	0.00748697	0.00748697	4.51784e-10	0.0063921	0.00641607		0.00929854	0.00677731		0.00827852	0.00690794		0.00810535	0.00882388
'AGPAT161'	0.0666038	0.00882456	0.00882456	5.32498e-10	0.00753408	0.00756234		0.0109598	0.00798811		0.00975753	0.00814208		0.00955341	0.0104003
'AGPAT180'	0	0	0	0	0	0		0	0		0	0		0	0
'AGPAT181'	0	0	0	0	0	0		0	0		0	0		0	0
'AGPR'	-0.261952	-0.0347069	-0.0347069	-2.07425e-09	-0.0296315	-0.0297426		-0.0431046	-0.0314172		-0.0383762	-0.0320227		-0.0375734	-0.0409043
'AGt3'	0	0	0	0	0	0		0	0		0	0		0	0
'AHCYSNS'	0.000394965	5.23302e-05	5.23302e-05	5.37464e-12	4.46776e-05	4.48451e-05		6.49921e-05	4.737e-05		5.78627e-05	4.82831e-05		5.66523e-05	6.16745e-05
'AICART'	0.479488	0.063529	0.063529	3.33292e-09	0.0542387	0.0544421		0.0789006	0.0575073		0.0702455	0.0586158		0.068776	0.074873
'AIRC2'	0.395589	0.0524129	0.0524129	2.67219e-09	0.0447482	0.044916		0.0650949	0.0474449		0.0579542	0.0483594		0.0567419	0.061772
'AIRC3'	-0.395589	-0.0524129	-0.0524129	-2.67217e-09	-0.0447482	-0.044916		-0.0650949	-0.0474449		-0.0579542	-0.0483594		-0.0567419	-0.061772
'AKGDH'	3.39009	1.71233	1.71233	-5.80056e-07	0	0		0	0		0	0		0	0
'AKGt2rpp'	0	3.00133e-11	0	3.00133e-11	3.00133e-11	0		3.00133e-11	0		3.00133e-11	0		3.00133e-11	0
'AKGtex'	0	3.00133e-11	0	3.00133e-11	3.00133e-11	0		3.00133e-11	0		3.00133e-11	0		3.00133e-11	0
'ALAALAD'	0	0	0	0	0	0		0	0		0	0		0	0
'ALAALAabcpp'	-2.66078e-28	1.00044e-11	0	1.00044e-11	1.00044e-11	0		0	0		1.00044e-11	0		1.00044e-11	0
'ALAALAr'	0.0246012	0.00325949	0.00325949	1.76689e-10	0.00278284	0.00279327		0.00404816	0.00295054		0.0036041	0.00300741		0.0035287	0.00384152
'ALAALAtex'	0	1.00044e-11	0	1.00044e-11	1.00044e-11	0		1.00044e-11	0		1.00044e-11	0		1.00044e-11	0
'ALAGLUE'	0	0	0	0	0	0		0	0		0	0		0	0
'ALAR'	0.0369018	0.00488924	0.00488924	2.54972e-10	0.00417425	0.0041899		0.00607225	0.0044258		0.00540614	2.84577		0.00529305	0.00576228
'ALATA_D2'	0	0	0	0	0	0		0	0		0	0		0	0
'ALATA_L'	-1000	-0.0683962	-0.0683962	-4.0472e-09	-1000	-0.0586131		-0.0849454	-0.0619131		-0.0756273	-2.90437		-1000	-0.0806092
'ALATA_L2'	0	0	0	0	0	0		0	0		0	0		0	0
'ALATRS'	0	0	0	0	0	0		0	0		0	0		0	0
'ALAabcpp'	0	1.00044e-11	0	1.00044e-11	1.00044e-11	0		1.00044e-11	0		1.00044e-11	0		1.00044e-11	0
'ALAt2pp'	0	1.00044e-11	0	1.00044e-11	1.00044e-11	0		1.00044e-11	0		1.00044e-11	0		1.00044e-11	0
'ALAt4pp'	0	1.00044e-11	0	1.00044e-11	1.00044e-11	0		1.00044e-11	0		1.00044e-11	0		1.00044e-11	0
'ALAtex'	0	-5.00832e-26	0	-5.00832e-26	-5.00832e-26	0		-5.00832e-26	0		-5.00832e-26	0		-5.00832e-26	0
'ALCD19'	0	5.00222e-11	0	5.00222e-11	5.00222e-11	0		5.00222e-11	0		5.00222e-11	0		5.00222e-11	0
'ALCD2x'	-6.38475e-25	5.00222e-11	0	5.00222e-11	5.00222e-11	0		5.00222e-11	0		5.00222e-11	0		-4.6374	-6.76753
'ALDD19x'	0	0	0	0	0	0		0	0		0	0		0	0
'ALDD2x'	0	0	0	0	0	0		0	0		0	0		0	0
'ALDD2y'	0	0	0	0	0	0		0	0		0	0		0	0
'ALDD3y'	0	1.00044e-11	0	1.00044e-11	1.00044e-11	0		1.00044e-11	0		1.00044e-11	0		1.00044e-11	0
'ALDD4'	0	1.00044e-11	0	1.00044e-11	1.00044e-11	0		1.00044e-11	0		1.00044e-11	0		1.00044e-11	0
'ALLK'	0	1.00044e-11	0	1.00044e-11	1.00044e-11	0		1.00044e-11	0		1.00044e-11	0		1.00044e-11	0
'ALLPI'	0	1.00044e-11	0	1.00044e-11	1.00044e-11	0		1.00044e-11	0		1.00044e-11	0		1.00044e-11	0
'ALLTAMH'	0	3.00133e-11	0	3.00133e-11	3.00133e-11	0		0	0		3.00133e-11	0		3.00133e-11	0
'ALLTN'	0	3.00133e-11	0	3.00133e-11	3.00133e-11	0		0	0		3.00133e-11	0		3.00133e-11	0
'ALLTNt2rpp'	0	3.00133e-11	0	3.00133e-11	3.00133e-11	0		0	0		3.00133e-11	0		3.00133e-11	0
'ALLTNtex'	0	3.00133e-11	0	3.00133e-11	3.00133e-11	0		0	0		3.00133e-11	0		3.00133e-11	0
'ALLULPE'	0	1.00044e-11	0	1.00044e-11	1.00044e-11	0		1.00044e-11	0		1.00044e-11	0		1.00044e-11	0
'ALLabcpp'	0	1.00044e-11	0	1.00044e-11	1.00044e-11	0		1.00044e-11	0		1.00044e-11	0		1.00044e-11	0
'ALLtex'	0	-5.00832e-26	0	-5.00832e-26	-5.00832e-26	0		-5.00832e-26	0		-5.00832e-26	0		-5.00832e-26	0
'ALPATE160pp'	0	0	0	0	0	0		0	0		0	0		0	0
'ALPATG160pp'	0	0	0	0	0	0		0	0		0	0		0	0
'ALR2'	0	0	0	0	0	0		0	0		0	0		0	0
'ALR4x'	0	0	0	0	0	0		0	0		0	0		0	0
'ALTRH'	0	1.20053e-10	0	1.20053e-10	0	0		0	0		0	0		0	0
'AM3PA'	-1.63668e-29	0	0	0	0	0		-1.00044e-11	0		0	0		0	0
'AM4PA'	1.67751e-29	0	0	0	0	0		0	0		0	0		0	0
'AM4PCP'	-1.63677e-29	0	0	0	0	0		0	0		0	0		0	0
'AMALT1'	0	5.00222e-12	0	5.00222e-12	5.00222e-12	0		5.00222e-12	0		5.00222e-12	0		5.00222e-12	0
'AMALT2'	0	3.50155e-11	0	3.50155e-11	3.50155e-11	0		3.50155e-11	0		3.50155e-11	0		3.50155e-11	0
'AMALT3'	0	3.50155e-11	0	3.50155e-11	3.50155e-11	0		3.50155e-11	0		3.50155e-11	0		3.50155e-11	0
'AMALT4'	0	3.50155e-11	0	3.50155e-11	3.50155e-11	0		3.50155e-11	0		3.50155e-11	0		3.50155e-11	0
'AMANAPEr'	0	2.00089e-11	0	2.00089e-11	2.00089e-11	0		2.00089e-11	0		2.00089e-11	0		2.00089e-11	0
'AMANK'	0	1.00044e-11	0	1.00044e-11	1.00044e-11	0		1.00044e-11	0		1.00044e-11	0		1.00044e-11	0
'AMAOTr'	0	0	0	0	0	0		0	0		0	0		0	0
'AMMQLT8'	0	0	0	0	0	0		0	0		0	0		0	0
'AMPMS2'	0.000197482	2.61651e-05	2.61651e-05	-8.42557e-12	2.23388e-05	2.24226e-05		3.24961e-05	2.3685e-05		2.89314e-05	2.41415e-05		2.83261e-05	3.08372e-05
'AMPN'	0	0	0	0	0	0		0	0		0	0		0	0
'AMPTASECG'	0	1.50067e-10	0	1.50067e-10	5.00222e-11	0		5.00222e-11	0		5.00222e-11	0		5.00222e-11	0
'AMPTASEPG'	0	1.00044e-11	0	1.00044e-11	1.00044e-11	0		1.00044e-11	0		1.00044e-11	0		1.00044e-11	0
'AMPtex'	0	-5.00832e-26	0	-5.00832e-26	-5.00832e-26	0		-5.00832e-26	0		-5.00832e-26	0		-5.00832e-26	0
'ANHGMtex'	0	1.00044e-11	0	1.00044e-11	1.00044e-11	0		1.00044e-11	0		1.00044e-11	0		1.00044e-11	0
'ANHMK'	-2.6603e-28	0	0	0	2.45174e-09	0		-1.00044e-11	0		0	0		0	0
'ANPRT'	0.0503359	0.00666917	0.00666917	3.62418e-10	0.00569389	0.00571524		0.00828285	0.00603702		0.00737426	0.00615338		0.00721999	0.00786004
'ANS'	0.0503359	0.00666917	0.00666917	3.62418e-10	0.00569389	0.00571524		0.00828285	0.00603702		0.00737426	0.00615338		0.00721999	0.00786004
'AOBUTDs'	0	0	0	0	0	0		0	0		0	0		0	0
'AOXSr'	0	0	0	0	0	0		0	0		0	0		0	0
'AP4AH'	0	0	0	0	0	0		0	0		0	0		0	0
'AP5AH'	0	0	0	0	0	0		0	0		0	0		0	0
'APRAUR'	0.000394965	5.23302e-05	5.23302e-05	3.15775e-12	4.46776e-05	4.48451e-05		6.49921e-05	4.737e-05		5.78627e-05	4.82831e-05		5.66523e-05	6.16745e-05
'ARAI'	0	5.00222e-12	0	5.00222e-12	5.00222e-12	0		5.00222e-12	0		5.00222e-12	0		5.00222e-12	0
'ARBTNR1'	0	0	0	0	0	0		0	0		0	0		0	0
'ARBTNR2'	0	0	0	0	0	0		0	0		0	0		0	0
'ARBTNR3'	0	0	0	0	0	0		0	0		0	0		0	0
'ARBTNabcpp'	0	0	0	0	0	0		0	0		0	0		0	0
'ARBTNexs'	0	0	0	0	0	0		0	0		0	0		0	0
'ARBTNtex'	0	0	0	0	0	0		0	0		0	0		0	0
'ARBTNtonex'	0	0	0	0	0	0		0	0		0	0		0	0
'ARBTNtpp'	0	0	0	0	0	0		0	0		0	0		0	0
'ARBabcpp'	0	0	0	0	0	0		0	0		0	0		0	0
'ARBt2rpp'	0	26.3736	0	26.3736	5.00222e-12	0		5.00222e-12	0		5.00222e-12	0		5.00222e-12	0
'ARBt3ipp'	0	26.3736	0	26.3736	0	0		0	0		0	0		0	0
'ARBtex'	0	5.00222e-12	0	5.00222e-12	5.00222e-12	0		5.00222e-12	0		5.00222e-12	0		5.00222e-12	0
'ARGAGMt7pp'	0	-1.00044e-11	0	-1.00044e-11	-1.00044e-11	0		-1.00044e-11	0		-1.00044e-11	0		-1.00044e-11	0
'ARGDC'	0	0	0	0	0	0		0	0		0	0		0	0
'ARGDCpp'	0	0	0	0	0	0		0	0		0	0		0	0
'ARGORNt7pp'	0	2.00089e-11	0	2.00089e-11	2.00089e-11	0		2.00089e-11	0		2.00089e-11	0		2.00089e-11	0
'ARGSL'	0.261952	0.0347069	0.0347069	2.08426e-09	0.0296315	0.0297426		0.0431046	0.0314172		0.0383762	0.0320227		0.0375734	0.0409043
'ARGSS'	0.261952	0.0347069	0.0347069	2.0843e-09	0.0296315	0.0297426		0.0431046	0.0314172		0.0383762	0.0320227		0.0375734	0.0409043
'ARGTRS'	0	0	0	0	0	0		0	0		0	0		0	0
'ARGabcpp'	0	0	0	0	0	0		0	0		0	0		0	0
'ARGt3pp'	0	0	0	0	0	0		0	0		0	0		0	0
'ARGtex'	0	1.00044e-11	0	1.00044e-11	1.00044e-11	0		1.00044e-11	0		1.00044e-11	0		1.00044e-11	0
'ASAD'	-0.946767	-0.12544	-0.12544	-7.42934e-09	-0.167144	-0.274476		-0.155792	-0.289929		-0.35415	-0.115739		-0.135801	-0.147839
'ASCBPL'	0	1.00044e-11	0	1.00044e-11	1.00044e-11	0		1.00044e-11	0		1.00044e-11	0		1.00044e-11	0
'ASCBptspp'	0	1.00044e-11	0	1.00044e-11	1.00044e-11	0		1.00044e-11	0		1.00044e-11	0		1.00044e-11	0
'ASCBtex'	0	-5.00832e-26	0	-5.00832e-26	-5.00832e-26	0		-5.00832e-26	0		-5.00832e-26	0		-5.00832e-26	0
'ASNN'	0	0	0	0	0	0		0	0		0	0		0	0
'ASNNpp'	0	-1.00044e-11	0	-1.00044e-11	-1.00044e-11	0		-1.00044e-11	0		-1.00044e-11	0		-1.00044e-11	0
'ASNS1'	0	0	0	0	0.0241519	0		0	0		0	0		0	0
'ASNS2'	0.213511	0.0282888	0.0282888	1.68701e-09	0	0.0242425		0.0351336	0.0256074		0.0312796	0.026101		0.0306253	0.0333402
'ASNTRS'	0	0	0	0	0	0		0	0		0	0		0	0
'ASNabcpp'	0	0	0	0	0	0		0	0		0	0		0	0
'ASNt2rpp'	0	2.00089e-11	0	2.00089e-11	2.00089e-11	0		2.00089e-11	0		2.00089e-11	0		2.00089e-11	0
'ASNtex'	0	1.00044e-11	0	1.00044e-11	1.00044e-11	0		1.00044e-11	0		1.00044e-11	0		1.00044e-11	0
'ASO3t8pp'	0	0	0	0	0	0		0	0		0	0		0	0
'ASO3tex'	0	0	0	0	0	0		0	0		0	0		0	0
'ASP1DC'	0.000510089	6.75834e-05	6.75834e-05	-5.82734e-12	5.77002e-05	5.79166e-05		8.3936e-05	6.11774e-05		7.47286e-05	6.23566e-05		7.31653e-05	7.96514e-05
'ASPCT'	0.292938	0.0388124	0.0388124	1.78179e-09	0.0331365	0.0332608		0.0482035	0.0351335		0.0429157	0.0358107		0.042018	0.0457428
'ASPK'	0.946767	0.12544	0.12544	7.42934e-09	0.167144	0.274476		0.155792	0.289929		0.35415	0.115739		0.135801	0.147839
'ASPO3'	0	0.000266859	0	0.000266859	0	0		0.000331955	0.000241948		0	0.000246612		0.000289359	0.00031501
'ASPO4'	0.00201733	0	0	0	0	0		0	0		0.000295541	0		0	0
'ASPO5'	0	0	0.000267283	-0.000267283	0.000228196	0.000229052		0	0		0	0		0	0
'ASPO6'	0	4.24383e-07	0	4.24383e-07	0	0		0	0		0	0		0	0
'ASPT'	0	0	0	0	0	8.34393e-06		0	0		0	0		0	0
'ASPTA'	-2.59088	-0.343275	-0.343275	-1.92829e-08	-0.353123	-0.46116		-0.426334	-0.487116		-0.595015	-0.316726		-0.371627	-0.404571
'ASPTRS'	0	0	0	0	0	0		0	0		0	0		0	0
'ASPabcpp'	0	0	0	0	0	0		0	0		0	0		0	0
'ASPt2_2pp'	0	0	0	0	0	0		0	0		0	0		0	0
'ASPt2_3pp'	0	0	0	0	0	0		0	0		0	0		0	0
'ASPt2pp'	0	0	0	0	0	0		0	0		0	0		0	0
'ASPtex'	0	1.00044e-11	0	1.00044e-11	1.00044e-11	0		1.00044e-11	0		1.00044e-11	0		1.00044e-11	0
'ASR'	0	0	0	0	0	0		0	0		0	0		0	0
'AST'	0	0	0	0	0	0		0	0		0	0		0	0
'ATHRDHr'	-1.97747e-24	1.00044e-11	0	1.00044e-11	1.00044e-11	0		1.00044e-11	0		1.00044e-11	0		-4.6374	0
'ATPHs'	0	0	0	0	0	0		0	0		0	0		0	0
'ATPM'	8.39	8.39	8.39	3.90799e-14	8.39	8.39		8.39	8.39		8.39	8.39		8.39	8.39
'ATPPRT'	0.083899	0.0111161	0.0111161	6.60769e-10	0.00949048	0.00952607		0.0138057	0.0100624		0.0122913	0.0102564		0.0120342	0.013101
'ATPS4rpp'	59.7002	0	0	0	0	0		2.63993	0		0	23.1786		42.5091	35.2237
'BALAt2pp'	0	1.00044e-11	0	1.00044e-11	1.00044e-11	0		1.00044e-11	0		1.00044e-11	0		1.00044e-11	0
'BALAtex'	0	-5.00832e-26	0	-5.00832e-26	-5.00832e-26	0		-5.00832e-26	0		-5.00832e-26	0		-5.00832e-26	0
'BETALDHx'	0	0	0	0	0	0		0	0		0	0		0	0
'BETALDHy'	0	0	0	0	0	0		0	0		0	0		0	0
'BPNT'	0.218118	0.0288992	0.0288992	1.46383e-09	0.024673	0.0247656		0.0358917	0.0261599		0.0319545	0.0266642		0.0312861	0.0340595
'BSORx'	0	0	0	0	0	0		0	0		0	0		0	0
'BSORy'	0	0	0	0	0	0		0	0		0	0		0	0
'BTS4'	0	0	0	0	0	0		0	0		0	0		0	0
'BUTCT'	0	3.00133e-11	0	3.00133e-11	3.00133e-11	0		3.00133e-11	0		3.00133e-11	0		3.00133e-11	0
'BUTSO3abcpp'	0	1.00044e-11	0	1.00044e-11	1.00044e-11	0		1.00044e-11	0		1.00044e-11	0		1.00044e-11	0
'BUTSO3tex'	0	-5.00832e-26	0	-5.00832e-26	-5.00832e-26	0		-5.00832e-26	0		-5.00832e-26	0		-5.00832e-26	0
'BUTt2rpp'	0	-1.74483e-25	0	-1.74483e-25	-1.74483e-25	0		-1.74483e-25	0		-1.74483e-25	0		-1.74483e-25	0
'BUTtex'	0	-1.74483e-25	0	-1.74483e-25	-1.74483e-25	0		-1.74483e-25	0		-1.74483e-25	0		-1.74483e-25	0
'CA2t3pp'	0	0	999.999	-999.999	0	0		0	999.999		0	999.999		0	999.999
'CA2tex'	0.00419495	0.000555803	0.000555803	3.35946e-11	0.000474524	0.000476303		0.000690286	0.000503121		0.000614565	0.000512818		0.000601709	0.000655049
'CADVtpp'	0	0	0	0	0	0		0	0		0	0		0	0
'CAT'	0	0	0	0	0	0		0	0		0	0		0	0
'CAt6pp'	-0.00419495	-0.000555803	-1000	999.999	-0.000474524	-0.000476303		-0.000690286	-1000		-0.000614565	-1000		-0.000601709	-1000
'CBIAT'	0	5.00222e-12	0	5.00222e-12	5.00222e-12	0		5.00222e-12	0		5.00222e-12	0		5.00222e-12	0
'CBItonex'	0	0	0	0	0	0		0	0		0	0		0	0
'CBIuabcpp'	0	5.00222e-12	0	5.00222e-12	5.00222e-12	0		5.00222e-12	0		5.00222e-12	0		5.00222e-12	0
'CBL1abcpp'	0	1.00044e-11	0	1.00044e-11	1.00044e-11	0		1.00044e-11	0		1.00044e-11	0		1.00044e-11	0
'CBL1tonex'	0	1.50067e-11	0	1.50067e-11	1.50067e-11	0		1.50067e-11	0		1.50067e-11	0		1.50067e-11	0
'CBLAT'	0	-5.00832e-26	0	-5.00832e-26	-5.00832e-26	0		-5.00832e-26	0		-5.00832e-26	0		-5.00832e-26	0
'CBMKr'	0.55489	0.0735192	0.0735192	3.83605e-09	0	0.0630034		0.0913081	0.0665506		0.081292	0.0678334		0.0795914	0.0866471
'CBPS'	0	0	0	0	0.062768	0		0	0		0	0		0	0
'CD2abcpp'	0	0	0	0	0	0		0	0		0	0		0	0
'CD2t3pp'	0	0	0	0	0	0		0	0		0	0		0	0
'CD2tex'	0	0	0	0	0	0		0	0		0	0		0	0
'CD2tpp'	0	0	0	0	0	0		0	0		0	0		0	0
'CDAPPA120'	0	0	0	0	0	0		0	0		0	0		0	0
'CDAPPA140'	0	0	0	0	0	0		0	0		0	0		0	0
'CDAPPA141'	0	0	0	0	0	0		0	0		0	0		0	0
'CDAPPA160'	0	0	0	0	0	0		0	0		0	0		0	0
'CDAPPA161'	0	0	0	0	0	0		0	0		0	0		0	0
'CDAPPA180'	0	0	0	0	0	0		0	0		0	0		0	0
'CDAPPA181'	0	0	0	0	0	0		0	0		0	0		0	0
'CDPMEK'	0.00211563	0.000280306	0.000280307	-7.4456e-10	0.000239315	0.000240213		0.00034813	0.000253738		0.000309941	0.000258628		0.000303458	0.00033036
'CFAS160E'	0	0	0	0	0	0		0	0		0	0		0	0
'CFAS160G'	0	0	0	0	0	0		0	0		0	0		0	0
'CFAS180E'	0	0	0	0	0	0		0	0		0	0		0	0
'CFAS180G'	0	0	0	0	0	0		0	0		0	0		0	0
'CGLYabcpp'	0	1.50067e-10	0	1.50067e-10	5.00222e-11	0		5.00222e-11	0		5.00222e-11	0		5.00222e-11	0
'CGLYtex'	0	1.00044e-11	0	1.00044e-11	1.00044e-11	0		1.00044e-11	0		1.00044e-11	0		1.00044e-11	0
'CHLabcpp'	0	0	0	0	0	0		0	0		0	0		0	0
'CHLt2pp'	0	0	0	0	0	0		0	0		0	0		0	0
'CHLtex'	0	-1.00044e-11	0	-1.00044e-11	-1.00044e-11	0		-1.00044e-11	0		-1.00044e-11	0		-1.00044e-11	0
'CHORM'	0.27809	0.036845	0.036845	2.10328e-09	0.0314569	0.0315749		0.0457601	0.0333526		0.0407404	0.0339955		0.0398882	0.0434242
'CHORS'	0.329216	0.0436189	0.0436189	2.47312e-09	0.0372402	0.0373798		0.054173	0.0394844		0.0482304	0.0402455		0.0472215	0.0514076
'CHRPL'	0.000197482	2.61651e-05	2.61651e-05	2.68732e-12	2.23388e-05	2.24226e-05		3.24961e-05	2.3685e-05		2.89314e-05	2.41415e-05		2.83262e-05	3.08372e-05
'CINNDO'	0	0	0	0	0	0		0	0		0	0		0	0
'CITL'	0	0	0	0	0	0		0	0		0	0		0	0
'CITt7pp'	0	1.00044e-11	0	1.00044e-11	1.00044e-11	0		1.00044e-11	0		1.00044e-11	0		1.00044e-11	0
'CITtex'	0	-5.00832e-26	0	-5.00832e-26	-5.00832e-26	0		-5.00832e-26	0		-5.00832e-26	0		-5.00832e-26	0
'CLIPAtex'	0	0	0	0	0	0		0	0		0	0		0	0
'CLPNH120pp'	0	0	0	0	0	0		1.00044e-11	0		0	0		0	0
'CLPNH140pp'	0	0	0	0	0	0		0	0		0	0		0	0
'CLPNH141pp'	-1.04201e-49	0	0	0	0	0		0	0		0	0		0	0
'CLPNH160pp'	0	0	0	0	0	0		0	0		0	0		0	0
'CLPNH161pp'	0	0	0	0	0	0		0	0		0	0		0	0
'CLPNH180pp'	0	0	0	0	0	0		0	0		0	0		0	0
'CLPNH181pp'	0	0	0	0	0	0		0	0		0	0		0	0
'CLPNS120pp'	0	0	0	0	0	0		1.00044e-11	0		0	0		0	0
'CLPNS140pp'	0	0	0	0	0	0		0	0		0	0		0	0
'CLPNS141pp'	-1.39851e-49	0	0	0	0	0		0	0		0	0		0	0
'CLPNS160pp'	0	0	0	0	0	0		0	0		0	0		0	0
'CLPNS161pp'	0	0	0	0	0	0		0	0		0	0		0	0
'CLPNS180pp'	0	0	0	0	0	0		0	0		0	0		0	0
'CLPNS181pp'	0	0	0	0	0	0		0	0		0	0		0	0
'CLt3_2pp'	0.00209748	0.000277902	0.000277902	1.67693e-11	0.000237262	0.000238152		0.000345143	0.00025156		0.000307282	0.000256409		0.000300854	0.000327525
'CLtex'	0.00419495	0.000555803	0.000555803	3.35946e-11	0.000474524	0.000476303		0.000690286	0.000503121		0.000614565	0.000512818		0.000601709	0.000655049
'CMPN'	0	0	0	0	0	0		0	0		0	0		0	0
'CMPtex'	0	-5.00832e-26	0	-5.00832e-26	-5.00832e-26	0		-5.00832e-26	0		-5.00832e-26	0		-5.00832e-26	0
'CO2tex'	-20.382	0	0	0	-0.196289	-0.197025		0	-8.59428		-1.13211	0.0103659		-13.4363	-11.1354
'CO2tpp'	-20.382	0	0	0	-0.196289	-0.197025		0	-8.59428		-1.13211	0.0103659		-13.4363	-11.1354
'COBALT2abcpp'	0	0	0	0	0	0		0	0		0	0		0	0
'COBALT2t3pp'	0	0	0	0	0	0		0	0		0	0		0	0
'COBALT2tex'	0.00279663	0.000370535	0.000370535	2.23964e-11	0.000316349	0.000317536		0.000460191	0.000335414		0.00040971	0.000341879		0.000401139	0.0004367
'COBALT2tpp'	0.00279663	0.000370535	0.000370535	2.23591e-11	0.000316349	0.000317536		0.000460191	0.000335414		0.00040971	0.000341879		0.000401139	0.0004367
'COLIPAabcpp'	0	0	0	0	0	0		2.00089e-11	0		2.00089e-11	0		0	0
'COLIPAtex'	9.51048e-30	-1.75089e-11	0	-1.75089e-11	-1.75089e-11	0		0	0		0	0		-1.75089e-11	0
'CPGNR1'	0	0	0	0	0	0		0	0		0	0		0	0
'CPGNR2'	0	0	0	0	0	0		0	0		0	0		0	0
'CPGNR3'	0	0	0	0	0	0		0	0		0	0		0	0
'CPGNUtex'	0	0	0	0	0	0		0	0		0	0		0	0
'CPGNUtpp'	0	0	0	0	0	0		0	0		0	0		0	0
'CPGNabcpp'	0	0	0	0	0	0		0	0		0	0		0	0
'CPGNexs'	0	0	0	0	0	0		0	0		0	0		0	0
'CPGNtonex'	0	0	0	0	0	0		0	0		0	0		0	0
'CPPPGO'	0.000197482	2.61651e-05	2.61651e-05	1.57887e-12	0	0		3.24961e-05	2.3685e-05		2.89314e-05	2.41415e-05		2.83262e-05	3.08372e-05
'CPPPGO2'	0	0	0	0	2.23388e-05	2.24226e-05		0	0		0	0		0	0
'CRNBTCT'	0	0	0	0	0	0		0	0		0	0		0	0
'CRNCAL2'	0	5.00222e-12	0	5.00222e-12	5.00222e-12	0		5.00222e-12	0		5.00222e-12	0		5.00222e-12	0
'CRNCAR'	0	0	0	0	0	0		0	0		0	0		0	0
'CRNCBCT'	0	5.00222e-12	0	5.00222e-12	5.00222e-12	0		5.00222e-12	0		5.00222e-12	0		5.00222e-12	0
'CRNCDH'	0	0	0	0	0	0		0	0		0	0		0	0
'CRNDCAL2'	0	0	0	0	0	0		0	0		0	0		0	0
'CRNDabcpp'	0	0	0	0	0	0		0	0		0	0		0	0
'CRNDt2rpp'	0	0	1000	-1000	0	1000		0	1000		0	1000		0	1000
'CRNabcpp'	0	0	0	0	0	0		0	0		0	0		0	0
'CRNt2rpp'	0	5.00222e-12	-1000	1000	5.00222e-12	-1000		5.00222e-12	-1000		5.00222e-12	-1000		5.00222e-12	-1000
'CRNt7pp'	0	0	0	0	0	0		0	0		0	0		0	0
'CRNt8pp'	0	0	1000	-1000	0	1000		0	1000		0	1000		0	1000
'CRNtex'	0	5.00222e-12	0	5.00222e-12	5.00222e-12	0		5.00222e-12	0		5.00222e-12	0		5.00222e-12	0
'CS'	4.34236	8.39151	8.39151	2.49189e-07	0.107719	0.108123		0.170631	0.11421		18.4071	18.485		0.615523	0.558077
'CSND'	0	1.00044e-11	0	1.00044e-11	1.00044e-11	0		1.00044e-11	0		1.00044e-11	0		1.00044e-11	0
'CSNt2pp'	0	1.00044e-11	0	1.00044e-11	1.00044e-11	0		1.00044e-11	0		1.00044e-11	0		1.00044e-11	0
'CSNtex'	0	-5.00832e-26	0	-5.00832e-26	-5.00832e-26	0		-5.00832e-26	0		-5.00832e-26	0		-5.00832e-26	0
'CTBTCAL2'	0	5.00222e-12	0	5.00222e-12	5.00222e-12	0		5.00222e-12	0		5.00222e-12	0		5.00222e-12	0
'CTBTabcpp'	0	0	0	0	0	1.13777		0	0		0	0		0	0
'CTBTt2rpp'	0	0	0	0	0	-1.13777		0	0		0	0		0	0
'CTPS2'	0.142152	0.0188342	0.0188342	9.91441e-10	0.0160799	0.0161402		0.0233913	0.017049		0.0208254	0.0173776		0.0203898	0.0221973
'CU1Opp'	0	5.00222e-12	0	5.00222e-12	5.00222e-12	0		5.00222e-12	0		5.00222e-12	0		5.00222e-12	0
'CU1abcpp'	0	0	0	0	0	0		0	0		0	0		0	0
'CU2abcpp'	0	0	0	0	0	0		0	0		0	0		0	0
'CU2tex'	0.00279663	0.000370535	0.000370535	2.38748e-12	0.000316349	0.000317536		0.000460191	0.000335414		0.00040971	0.000341879		0.000401139	0.0004367
'CU2tpp'	0.00279663	0.000370535	0.000370535	2.23591e-11	0.000316349	0.000317536		0.000460191	0.000335414		0.00040971	0.000341879		0.000401139	0.0004367
'CUt3'	0	0	0	0	0	0		0	0		0	0		0	0
'CUtex'	0	-1.00166e-25	0	-1.00166e-25	-1.00166e-25	0		-1.00166e-25	0		-1.00166e-25	0		-1.00166e-25	0
'CYANST'	0	0	0	0	0	0		0	0		0	0		0	0
'CYANSTpp'	0	1.00044e-11	0	1.00044e-11	1.00044e-11	0		1.00044e-11	0		1.00044e-11	0		1.00044e-11	0
'CYANtex'	0	-5.00832e-26	0	-5.00832e-26	-5.00832e-26	0		-5.00832e-26	0		-5.00832e-26	0		-5.00832e-26	0
'CYNTAH'	0	1.00044e-11	0	1.00044e-11	1.00044e-11	0		1.00044e-11	0		1.00044e-11	0		1.00044e-11	0
'CYNTt2pp'	0	1.00044e-11	0	1.00044e-11	1.00044e-11	0		1.00044e-11	0		1.00044e-11	0		1.00044e-11	0
'CYNTtex'	0	-5.00832e-26	0	-5.00832e-26	-5.00832e-26	0		-5.00832e-26	0		-5.00832e-26	0		-5.00832e-26	0
'CYSDDS'	0	1.00044e-11	0	1.00044e-11	1.00044e-11	0		1.00044e-11	0		1.00044e-11	0		1.00044e-11	0
'CYSDS'	0	0	0	0	0	0		0	0		0	0		0	0
'CYSDabcpp'	0	1.00044e-11	0	1.00044e-11	1.00044e-11	0		1.00044e-11	0		1.00044e-11	0		1.00044e-11	0
'CYSDtex'	0	-5.00832e-26	0	-5.00832e-26	-5.00832e-26	0		-5.00832e-26	0		-5.00832e-26	0		-5.00832e-26	0
'CYSS'	0.218118	0.0288992	0.0288992	1.53386e-09	0.024673	0.0247656		0.0358917	0.0261599		0.0319545	0.0266642		0.0312861	0.0340595
'CYSSADS'	0	0	0	0	0	0		0	0		0	0		0	0
'CYSTL'	0.13631	0.0180601	0.0180601	1.03978e-09	0.0154191	0.0154769		0.02243	0.0163483		0.0199695	0.0166634		0.0195518	0.021285
'CYSTRS'	0	0	0	0	0	0		0	0		0	0		0	0
'CYSabc2pp'	0	0	0	0	0	0		0	0		0	0		0	0
'CYSabcpp'	0	1.00044e-11	0	1.00044e-11	1.00044e-11	0		1.00044e-11	0		1.00044e-11	0		1.00044e-11	0
'CYStex'	0	1.00044e-11	0	1.00044e-11	1.00044e-11	0		1.00044e-11	0		1.00044e-11	0		1.00044e-11	0
'CYStpp'	0	0	0	0	0	0		0	0		0	0		0	0
'CYTBD2pp'	0	0	0	0	0	0		0	0		0	0		0	0
'CYTBDpp'	0	0	0	0	0	0		0	0		0	0		0	0
'CYTBO3_4pp'	36.9994	24.7965	24.7966	-7.86247e-05	0	0		7.95877	16.7368		36.9999	33.886		36.9999	29.8039
'CYTD'	0	0	0	0	0	0		0	0		0	0		0	0
'CYTDH'	0	0	0	0	0	0		0	0		0	0		0	0
'CYTDK2'	0	0	0	0	0	0		0	0		0	0		0	0
'CYTDt2pp'	0	0	0	0	0	0		0	0		0	0		0	0
'CYTDt2rpp'	0	1.20053e-10	0	1.20053e-10	1.20053e-10	0		1.20053e-10	0		1.20053e-10	0		1.20053e-10	0
'CYTDtex'	0	8.50378e-11	0	8.50378e-11	8.50378e-11	0		8.50378e-11	0		8.50378e-11	0		8.50378e-11	0
'CYTK1'	0.160187	0.0212237	0.0212237	6.19391e-10	0.01812	0.0181879		0.026359	0.0192119		0.0234675	0.0195822		0.0229766	0.0250134
'CYTK2'	0	2.50111e-11	0	2.50111e-11	2.50111e-11	0		2.50111e-11	0		2.50111e-11	0		2.50111e-11	0
'DAAD'	0	0	0	0	0	0		0	0		0	2.84126		0	0
'DADA'	0	0	0	0	0	0		0	0		0	0		0	0
'DADK'	3.03294e-28	0	0	0	0	0		0	0		0	0		0	0
'DADNt2pp'	0	2.50111e-11	0	2.50111e-11	2.50111e-11	0		2.50111e-11	0		2.50111e-11	0		2.50111e-11	0
'DADNtex'	0	-1.50067e-11	0	-1.50067e-11	-1.50067e-11	0		-1.50067e-11	0		-1.50067e-11	0		-1.50067e-11	0
'DAGK120'	0	0	0	0	0	0		0	0		0	0		0	0
'DAGK140'	0	0	0	0	0	0		0	0		0	0		0	0
'DAGK141'	0	0	0	0	0	0		0	0		0	0		0	0
'DAGK160'	0	0	0	0	0	0		0	0		0	0		0	0
'DAGK161'	0	0	0	0	0	0		0	0		0	0		0	0
'DAGK180'	0	0	0	0	0	0		0	0		0	0		0	0
'DAGK181'	0	0	0	0	0	0		0	0		0	0		0	0
'DALAt2pp'	0.0123006	0.00162975	0.00162975	9.83432e-11	0.00139142	0.00139663		0.00202408	0.00147527		0.00180205	0.0015037		0.00176435	0.00192076
'DALAtex'	0	1.00044e-11	0	1.00044e-11	1.00044e-11	0		1.00044e-11	0		1.00044e-11	0		1.00044e-11	0
'DAMPtex'	0	-5.00832e-26	0	-5.00832e-26	-5.00832e-26	0		-5.00832e-26	0		-5.00832e-26	0		-5.00832e-26	0
'DAPAL'	0	1.00044e-11	0	1.00044e-11	1.00044e-11	0		1.00044e-11	0		1.00044e-11	0		1.00044e-11	0
'DAPDC'	0.303928	0.0402684	0.0402684	2.39989e-09	0.0343797	0.0345086		0.0500119	0.0364515		0.0445258	0.0371541		0.0435943	0.0474589
'DAPE'	0.328529	0.0435279	0.0435279	2.56661e-09	0.0371625	0.0373019		0.05406	0.0394021		0.0481299	0.0401616		0.047123	0.0513004
'DAPabcpp'	0	1.00044e-11	0	1.00044e-11	1.00044e-11	0		1.00044e-11	0		1.00044e-11	0		1.00044e-11	0
'DAPtex'	0	0	0	0	0	0		0	0		0	0		0	0
'DASYN120'	0	0	0	0	0	0		-2.00089e-11	0		0	0		0	0
'DASYN140'	0	0	0	0	0	0		0	0		0	0		0	0
'DASYN141'	0	0	0	0	0	0		0	0		0	0		0	0
'DASYN160'	0.0565083	0.00748697	0.00748697	4.51784e-10	0.0063921	0.00641607		0.00929854	0.00677731		0.00827852	0.00690794		0.00810535	0.00882388
'DASYN161'	0.0666038	0.00882456	0.00882456	5.02485e-10	0.00753408	0.00756234		0.0109598	0.00798811		0.00975753	0.00814208		0.00955341	0.0104003
'DASYN180'	0	0	0	0	0	0		0	0		0	0		0	0
'DASYN181'	0	0	0	0	0	0		0	0		0	0		0	0
'DATPHs'	0	0	0	0	0	0		0	0		0	0		0	0
'DB4PS'	0.00078993	0.00010466	0.00010466	6.31549e-12	8.93552e-05	8.96902e-05		0.000129984	9.474e-05		0.000115725	9.65661e-05		0.000113305	0.000123349
'DBTS'	0	0	0	0	0	0		0	0		0	0		0	0
'DCAtex'	0	-5.00832e-26	0	-5.00832e-26	-5.00832e-26	0		-5.00832e-26	0		-5.00832e-26	0		-5.00832e-26	0
'DCMPtex'	0	-5.00832e-26	0	-5.00832e-26	-5.00832e-26	0		-5.00832e-26	0		-5.00832e-26	0		-5.00832e-26	0
'DCTPD'	0	0	0	0	0	0		0	0		0	0		0	0
'DCYTD'	0	0	0	0	0	0		0	0		0	0		0	0
'DCYTt2pp'	0	2.50111e-11	0	2.50111e-11	2.50111e-11	0		2.50111e-11	0		2.50111e-11	0		2.50111e-11	0
'DCYTtex'	0	-1.50067e-11	0	-1.50067e-11	-1.50067e-11	0		-1.50067e-11	0		-1.50067e-11	0		-1.50067e-11	0
'DDCAtexi'	0	0	0	0	0	0		0	0		0	0		0	0
'DDGALK'	0	1.00044e-11	0	1.00044e-11	1.00044e-11	0		1.00044e-11	0		1.00044e-11	0		1.00044e-11	0
'DDGLCNt2rpp'	0	-3.30147e-10	0	-3.30147e-10	-3.30147e-10	0		-3.30147e-10	0		-3.30147e-10	0		-3.30147e-10	0
'DDGLCNtex'	0	-3.50155e-10	0	-3.50155e-10	-3.50155e-10	0		-3.50155e-10	0		-3.50155e-10	0		-3.50155e-10	0
'DDGLK'	0	3.6016e-10	0	3.6016e-10	0	0		0	0		0	0		0	0
'DDPA'	0.329216	0.0436189	0.0436189	2.46311e-09	0.0372402	0.0373798		0.054173	0.0394844		0.0482304	0.0402455		0.0472215	0.0514076
'DDPGALA'	0	1.00044e-11	0	1.00044e-11	1.00044e-11	0		1.00044e-11	0		1.00044e-11	0		1.00044e-11	0
'DGK1'	1.06652e-28	0	0	0	0	0		-14.8106	0		0	0		9.004e-11	0
'DGMPtex'	0	-5.00832e-26	0	-5.00832e-26	-5.00832e-26	0		-5.00832e-26	0		-5.00832e-26	0		-5.00832e-26	0
'DGSNt2pp'	0	2.50111e-11	0	2.50111e-11	2.50111e-11	0		2.50111e-11	0		2.50111e-11	0		2.50111e-11	0
'DGSNtex'	0	-1.50067e-11	0	-1.50067e-11	-1.50067e-11	0		-1.50067e-11	0		-1.50067e-11	0		-1.50067e-11	0
'DHAD1'	0.774234	0.102581	0.102581	6.17009e-09	0.0875797	0.0879081		0.127401	0.0928576		0.113426	0.0946474		0.111053	0.120898
'DHAD2'	0.257258	0.034085	0.034085	2.04678e-09	0.0291005	0.0292097		0.0423323	0.0308542		0.0376886	0.0314489		0.0369002	0.0401714
'DHAPT'	0	0	5.6622	-5.6622	0	0		0	0.0150074		8.98507	0		0	0
'DHAtex'	0	3.00133e-11	0	3.00133e-11	3.00133e-11	0		3.00133e-11	0		3.00133e-11	0		3.00133e-11	0
'DHAtpp'	0	3.00133e-11	0	3.00133e-11	3.00133e-11	0		3.00133e-11	0		3.00133e-11	0		3.00133e-11	0
'DHBD'	0	0	0	0	0	0		0	0		0	0		0	0
'DHBS'	0	0	0	0	0	0		5.00222e-12	0		0	0		0	0
'DHBSH'	0	0	0	0	0	0		5.00222e-12	0		0	0		0	0
'DHCIND'	0	0	0	0	0	0		0	0		0	0		0	0
'DHCINDO'	0	1.00044e-11	0	1.00044e-11	1.00044e-11	0		1.00044e-11	0		1.00044e-11	0		1.00044e-11	0
'DHDPRy'	0.328529	0.0435279	0.0435279	2.56657e-09	0.0371625	0.0373019		0.05406	0.0394021		0.0481299	0.0401616		0.047123	0.0513004
'DHDPS'	0.328529	0.0435279	0.0435279	2.56657e-09	0.0371625	0.0373019		0.05406	0.0394021		0.0481299	0.0401616		0.047123	0.0513004
'DHFR'	0.0237678	0.00314908	0.00314908	1.20048e-10	0.00268857	0.00269865		0.00391104	0.00285059		0.00348201	0.00290554		0.00340917	0.00371139
'DHFS'	0.000592447	7.84953e-05	7.84953e-05	4.73662e-12	6.70164e-05	6.72677e-05		9.74882e-05	7.1055e-05		8.67941e-05	7.24246e-05		8.49785e-05	9.25117e-05
'DHNAOT4'	0	0	0	0	0	0		0	0		0	0		0	0
'DHNPA2'	0.000592447	7.84953e-05	7.84953e-05	4.73662e-12	6.70164e-05	6.72677e-05		9.74882e-05	7.1055e-05		8.67941e-05	7.24246e-05		8.49785e-05	9.25117e-05
'DHORD2'	0	0.0388124	0	0.0388124	0	0		0	0		0.0429157	0.0358107		0.042018	0.0457428
'DHORD5'	0.292938	0	0.0388124	-0.0388124	0.0331365	0.0332608		0.0482035	0.0351335		0	0		-4.95201e-12	0
'DHORTS'	-0.292938	-0.0388124	-0.0388124	-1.78181e-09	-0.0331365	-0.0332608		-0.0482035	-0.0351335		-0.0429157	-0.0358107		-0.042018	-0.0457428
'DHPPD'	0	1.00044e-11	0	1.00044e-11	1.00044e-11	0		1.00044e-11	0		1.00044e-11	0		1.00044e-11	0
'DHPPDA2'	0.000394965	5.23302e-05	5.23302e-05	3.15775e-12	4.46776e-05	4.48451e-05		6.49921e-05	4.737e-05		5.78627e-05	4.82831e-05		5.66523e-05	6.16745e-05
'DHPS2'	0.000592447	7.84953e-05	7.84953e-05	4.73662e-12	6.70164e-05	6.72677e-05		9.74882e-05	7.1055e-05		8.67941e-05	7.24246e-05		8.49785e-05	9.25117e-05
'DHPTDCs'	0.000394965	5.23302e-05	5.23302e-05	5.37464e-12	4.46776e-05	4.48451e-05		6.49921e-05	4.737e-05		5.78627e-05	4.82831e-05		5.66523e-05	6.16745e-05
'DHPTPE'	0	0	0	0	0	0		0	0		0	0		0	0
'DHQS'	0.329216	0.0436189	0.0436189	2.46311e-09	0.0372402	0.0373798		0.054173	0.0394844		0.0482304	0.0402455		0.0472215	0.0514076
'DHQTi'	0.329216	0.0436189	0.0436189	2.46311e-09	0.0372402	0.0373798		0.054173	0.0394844		0.0482304	0.0402455		0.0472215	0.0514076
'DIMPtex'	0	-5.00832e-26	0	-5.00832e-26	-5.00832e-26	0		-5.00832e-26	0		-5.00832e-26	0		-5.00832e-26	0
'DINSt2pp'	0	2.50111e-11	0	2.50111e-11	2.50111e-11	0		2.50111e-11	0		2.50111e-11	0		2.50111e-11	0
'DINStex'	0	-1.50067e-11	0	-1.50067e-11	-1.50067e-11	0		-1.50067e-11	0		-1.50067e-11	0		-1.50067e-11	0
'DKGLCNR1'	0	0	0	0	0	0		0	0		0	0		0	0
'DKGLCNR2x'	0	0	0	0	0	0		0	0		0	0		0	0
'DKGLCNR2y'	0	0	0	0	0	0		0	0		0	0		0	0
'DKMPPD'	0	2.50416e-26	0	2.50416e-26	2.50416e-26	0		2.50416e-26	0		2.50416e-26	0		2.50416e-26	0
'DKMPPD3'	0	2.50416e-26	0	2.50416e-26	2.50416e-26	0		2.50416e-26	0		2.50416e-26	0		2.50416e-26	0
'DMATT'	0.000246189	3.26183e-05	3.26184e-05	-6.69544e-11	2.78483e-05	2.79528e-05		4.05107e-05	2.95266e-05		3.60668e-05	3.00957e-05		3.53124e-05	3.84428e-05
'DMPPS'	0.00211563	0	0	0	0	0		0	0		0	0		0	0
'DMQMT'	0	0	0	0	0	0		0	0		0	0		0	0
'DMSOR1'	0	0	0	0	0	0		0	0		0	0		0	0
'DMSOR1pp'	0	1.00044e-11	0	1.00044e-11	1.00044e-11	0		1.00044e-11	0		1.00044e-11	0		1.00044e-11	0
'DMSOR2'	0	0	0	0	0	0		0	0		0	0		0	0
'DMSOR2pp'	0	1.00044e-11	0	1.00044e-11	1.00044e-11	0		1.00044e-11	0		1.00044e-11	0		1.00044e-11	0
'DMSOtex'	0	-5.00832e-26	0	-5.00832e-26	-5.00832e-26	0		-5.00832e-26	0		-5.00832e-26	0		-5.00832e-26	0
'DMStex'	0	-2.00089e-11	0	-2.00089e-11	-2.00089e-11	0		-2.00089e-11	0		-2.00089e-11	0		-2.00089e-11	0
'DM_4HBA'	0.000197482	2.61651e-05	2.61651e-05	-8.42557e-12	2.23388e-05	2.24226e-05		3.24961e-05	2.3685e-05		2.89314e-05	2.41415e-05		2.83261e-05	3.08372e-05
'DM_5DRIB'	0	0	0	0	4.46776e-05	4.48451e-05		0	0		0	0		0	0
'DM_AACALD'	0	1.00044e-11	0	1.00044e-11	1.00044e-11	0		1.00044e-11	0		1.00044e-11	0		1.00044e-11	0
'DM_HMFURN'	0.000394965	5.23302e-05	5.23302e-05	5.37464e-12	4.46776e-05	4.48451e-05		6.49921e-05	4.737e-05		5.78627e-05	4.82831e-05		5.66523e-05	6.16745e-05
'DM_OXAM'	0	3.00133e-11	0	3.00133e-11	0	0		0	0		0	0		0	0
'DNMPPA'	0.000592447	7.84953e-05	7.84953e-05	4.73662e-12	6.70164e-05	6.72677e-05		9.74882e-05	7.1055e-05		8.67941e-05	7.24246e-05		8.49785e-05	9.25117e-05
'DNTPPA'	0.000592447	7.84953e-05	7.84953e-05	4.73662e-12	6.70164e-05	6.72677e-05		9.74882e-05	7.1055e-05		8.67941e-05	7.24246e-05		8.49785e-05	9.25117e-05
'DOGULNR'	0	0	0	0	0	0		0	0		0	0		0	0
'DOPAtex'	0	-5.00832e-26	0	-5.00832e-26	-5.00832e-26	0		-5.00832e-26	0		-5.00832e-26	0		-5.00832e-26	0
'DPCOAK'	0.000510089	6.75834e-05	6.75834e-05	1.41815e-11	5.77002e-05	5.79166e-05		8.3936e-05	6.11774e-05		7.47286e-05	6.23566e-05		7.31653e-05	7.96514e-05
'DPR'	0.000510089	6.75834e-05	6.75834e-05	4.1771e-12	5.77002e-05	5.79166e-05		8.3936e-05	6.11774e-05		7.47286e-05	6.23566e-05		7.31653e-05	7.96514e-05
'DRPA'	0	9.004e-11	0	9.004e-11	9.004e-11	0		14.8106	14.8395		9.004e-11	0		0	0
'DSBAO1'	0	0	0	0	0	0		0	0		0	0		0	0
'DSBAO2'	0	0	0	0	0	0		0	0		0	0		0	0
'DSBCGT'	0	0	0	0	0	0		0	0		0	0		0	0
'DSBDR'	0	0	0	0	0	0		0	0		0	0		0	0
'DSBGGT'	0	0	0	0	0	0		0	0		0	0		0	0
'DSERDHr'	0	1.00044e-11	0	1.00044e-11	1.00044e-11	0		1.00044e-11	0		1.00044e-11	0		1.00044e-11	0
'DSERt2pp'	0	1.00044e-11	0	1.00044e-11	1.00044e-11	0		1.00044e-11	0		1.00044e-11	0		1.00044e-11	0
'DSERtex'	0	-5.00832e-26	0	-5.00832e-26	-5.00832e-26	0		-5.00832e-26	0		-5.00832e-26	0		-5.00832e-26	0
'DTMPK'	0.0231754	0.00307059	0.00307059	1.85328e-10	0.00262155	0.00263138		0.00381355	0.00277954		0.00339522	0.00283311		0.0033242	0.00361888
'DTMPtex'	0	-5.00832e-26	0	-5.00832e-26	-5.00832e-26	0		-5.00832e-26	0		-5.00832e-26	0		-5.00832e-26	0
'DUMPtex'	0	-5.00832e-26	0	-5.00832e-26	-5.00832e-26	0		-5.00832e-26	0		-5.00832e-26	0		-5.00832e-26	0
'DURIK1'	0	0	0	0	0	0		0	0		0	0		0	0
'DURIPP'	4.10676e-28	2.50111e-11	0	2.50111e-11	2.50111e-11	0		2.50111e-11	0		2.50111e-11	0		2.50111e-11	0
'DURIt2pp'	0	2.50111e-11	0	2.50111e-11	2.50111e-11	0		2.50111e-11	0		2.50111e-11	0		2.50111e-11	0
'DURItex'	0	-1.50067e-11	0	-1.50067e-11	-1.50067e-11	0		-1.50067e-11	0		-1.50067e-11	0		-1.50067e-11	0
'DUTPDP'	0	0	0	0	0	0		0	0		0	0		0	0
'DXPRIi'	0.00211563	0.000280306	0.000280307	-7.4456e-10	0.000239315	0.000240213		0.00034813	0.000253738		0.000309941	0.000258628		0.000303458	0.00033036
'DXPS'	0.00251059	0.000332636	0.000332637	-7.51407e-10	0.000283992	0.000285058		0.000413122	0.000301108		0.000367804	0.000306911		0.00036011	0.000392034
'DXYLK'	0	0	0	0	0	0		0	0		0	0		0	0
'D_LACt2pp'	0	3.00133e-11	0	3.00133e-11	-18.5225	-18.517		3.00133e-11	0		3.00133e-11	0		3.00133e-11	0
'D_LACtex'	0	3.00133e-11	0	3.00133e-11	-18.5225	-18.517		3.00133e-11	0		3.00133e-11	0		3.00133e-11	0
'E4PD'	0.000197482	2.61651e-05	2.61651e-05	1.58388e-12	2.23388e-05	2.24226e-05		3.24961e-05	2.3685e-05		2.89314e-05	2.41415e-05		2.83262e-05	3.08372e-05
'EAR100x'	0.181914	0.0241024	0.0241024	1.42439e-09	0.0205777	0.0206549		0.0299343	0.0218178		0.0266506	0.0222384		0.0260931	0.0284062
'EAR100y'	0	0	0	0	0	0		0	0		0	0		0	0
'EAR120x'	0.181914	0.0241024	0.0241024	1.4544e-09	0.0205777	0.0206549		0.0299343	0.0218178		0.0266506	0.0222384		0.0260931	0
'EAR120y'	0	0	0	0	0	0		0	0		0	0		0	0.0284062
'EAR121x'	0.133208	0.0176491	0.0176491	1.065e-09	0.0150682	0.0151247		0.0219195	0		0.0195151	0.0162842		0.0191068	0.0208006
'EAR121y'	0	0	0	0	0	0		0	0.0159762		0	0		0	0
'EAR140x'	0.113017	0.0149739	0.0149739	9.03568e-10	0.0127842	0.0128321		0.0185971	0.0135546		0.016557	0.0138159		0.0162107	0.0176478
'EAR140y'	0	0	0	0	0	0		0	0		0	0		0	0
'EAR141x'	0.133208	0.0176491	0.0176491	1.065e-09	0.0150682	0.0151247		0.0219195	0.0159762		0.0195151	0.0162842		0.0191068	0.0208006
'EAR141y'	0	0	0	0	0	0		0	0		0	0		0	0
'EAR160x'	0.113017	0.0149739	0.0149739	9.03568e-10	0.0127842	0.0128321		0.0185971	0.0135546		0.016557	0.0138159		0.0162107	0.0176478
'EAR160y'	0	0	0	0	0	0		0	0		0	0		0	0
'EAR161x'	0.133208	0.0176491	0.017648	1.10423e-06	0.0150682	0.0151247		0.0219195	0.0159762		0.0195151	0.0162842		0.0191068	0.0208006
'EAR161y'	0	0	1.10317e-06	-1.10317e-06	0	0		0	0		0	0		0	0
'EAR180x'	0	0	0	0	0	0		0	0		0	0		0	0
'EAR180y'	0	0	0	0	0	0		0	0		0	0		0	0
'EAR181x'	0	0	0	0	0	0		0	0		0	0		0	0
'EAR181y'	0	0	0	0	0	0		0	0		0	0		0	0
'EAR40x'	0.315122	0.0417515	0.0417515	2.48939e-09	0.0356459	0.0357796		0.0518538	0.0377941		0.0461657	0.0385225		0.0451999	0.0492068
'EAR40y'	0	0	0	0	0	0		0	0		0	0		0	0
'EAR60x'	0.315122	0.0417515	0.0417515	2.48939e-09	0.0356459	0.0357796		0.0518538	0.0377941		0.0461657	0.0385225		0.0451999	0.0492068
'EAR60y'	0	0	0	0	0	0		0	0		0	0		0	0
'EAR80x'	0.315122	0.0417515	0.0417515	2.48939e-09	0.0356459	0.0357796		0.0518538	0.0377941		0.0461657	0.0385225		0.0451999	0.0492068
'EAR80y'	0	0	0	0	0	0		0	0		0	0		0	0
'ECA4COLIPAtex'	-9.51119e-30	0	0	0	0	0		0	0		0	0		0	0
'ECA4OALpp'	-9.51119e-30	0	0	0	0	0		0	0		0	0		0	0
'ECAP1pp'	9.51119e-30	0	0	0	0	0		0	0		0	0		0	0
'ECAP2pp'	-9.51093e-30	0	0	0	0	0		0	0		0	0		0	0
'ECAP3pp'	-9.51093e-30	0	0	0	0	0		0	0		0	0		0	0
'ECAtpp'	0	0	0	0	0	0		0	0		0	0		0	0
'ECOAH1'	-8.87864e-28	-3.00133e-11	0	-3.00133e-11	-3.00133e-11	0		-3.00133e-11	0		-3.00133e-11	0		-3.00133e-11	0
'ECOAH2'	-8.87871e-28	0	0	0	0	0		0	0		0	0		0	0
'ECOAH3'	0	1.00044e-11	0	1.00044e-11	1.00044e-11	0		1.00044e-11	0		1.00044e-11	0		1.00044e-11	0
'ECOAH4'	-1.73024e-30	2.00089e-11	0	2.00089e-11	2.00089e-11	0		2.00089e-11	0		2.00089e-11	0		2.00089e-11	0
'ECOAH5'	1.76764e-27	0	0	0	0	0		0	0		0	0		0	0
'ECOAH6'	3.57519e-30	0	0	0	0	0		0	0		0	0		0	0
'ECOAH7'	0	0	0	0	0	0		0	0		0	0		0	0
'ECOAH8'	0	0	0	0	0	0		0	0		0	0		0	0
'EDA'	0	3.6016e-10	0	3.6016e-10	1.6476	1.33367		7.00311e-11	0		7.00311e-11	9.90621		0	0
'EDD'	0	0	0	0	1.6476	1.33367		7.00311e-11	0		7.00311e-11	9.90621		0	0
'EDTXS1'	2.48247e-30	0	0	0	0	0		2.00089e-11	0		2.00089e-11	0		0	0
'EDTXS2'	0	0	0	0	0	0		2.00089e-11	0		2.00089e-11	0		0	0
'EDTXS3'	0	0	0	0	0	0		0	0		0	0		0	0
'EDTXS4'	0	0	0	0	0	0		0	0		0	0		0	0
'ENLIPAtex'	0	0	0	0	0	0		0	0		0	0		0	0
'ENO'	14.7734	19.518	19.518	-2.314e-08	18.0064	18.3191		9.52766	9.85298		19.6897	0		0	0
'ENTCS'	0	0	0	0	0	0		1.66741e-12	0		0	0		0	0
'ENTERES'	0	0	0	0	-1.66159e-12	0		0	0		-1.66133e-12	0		-1.66741e-12	0
'ENTERES2'	0	-1.66741e-12	0	-1.66741e-12	0	0		0	0		0	0		0	0
'ETHAAL'	0	0	0	0	0	0		0	0		2.00089e-11	0		2.00089e-11	0
'ETHAt2pp'	0	0	0	0	0	0		0	0		2.00089e-11	0		2.00089e-11	0
'ETHAtex'	0	1.00044e-11	0	1.00044e-11	1.00044e-11	0		1.00044e-11	0		1.00044e-11	0		1.00044e-11	0
'ETHSO3abcpp'	0	1.00044e-11	0	1.00044e-11	1.00044e-11	0		1.00044e-11	0		1.00044e-11	0		1.00044e-11	0
'ETHSO3tex'	0	-5.00832e-26	0	-5.00832e-26	-5.00832e-26	0		-5.00832e-26	0		-5.00832e-26	0		-5.00832e-26	0
'ETOHt2rpp'	0	5.00222e-11	0	5.00222e-11	5.00222e-11	0		5.00222e-11	0		5.00222e-11	0		-4.6374	-6.76753
'ETOHtex'	0	5.00222e-11	0	5.00222e-11	5.00222e-11	0		5.00222e-11	0		5.00222e-11	0		-4.6374	-6.76753
'EX_12ppd_R(e)'	0	-1.00044e-11	0	-1.00044e-11	-1.00044e-11	0		-1.00044e-11	0		-1.00044e-11	0		-1.00044e-11	0
'EX_12ppd_S(e)'	0	-5.00222e-12	0	-5.00222e-12	-5.00222e-12	0		-5.00222e-12	0		-5.00222e-12	0		-5.00222e-12	0
'EX_14glucan(e)'	0	0	0	0	0	0		0	0		0	0		0	0
'EX_15dap(e)'	0	0	0	0	0	0		0	0		0	0		0	0
'EX_23camp(e)'	0	5.00832e-26	0	5.00832e-26	5.00832e-26	0		5.00832e-26	0		5.00832e-26	0		5.00832e-26	0
'EX_23ccmp(e)'	0	5.00832e-26	0	5.00832e-26	5.00832e-26	0		5.00832e-26	0		5.00832e-26	0		5.00832e-26	0
'EX_23cgmp(e)'	0	5.00832e-26	0	5.00832e-26	5.00832e-26	0		5.00832e-26	0		5.00832e-26	0		5.00832e-26	0
'EX_23cump(e)'	0	5.00832e-26	0	5.00832e-26	5.00832e-26	0		5.00832e-26	0		5.00832e-26	0		5.00832e-26	0
'EX_23dappa(e)'	0	5.00832e-26	0	5.00832e-26	5.00832e-26	0		5.00832e-26	0		5.00832e-26	0		5.00832e-26	0
'EX_26dap_M(e)'	0	5.00832e-26	0	5.00832e-26	5.00832e-26	0		5.00832e-26	0		5.00832e-26	0		5.00832e-26	0
'EX_2ddglcn(e)'	0	3.50155e-10	0	3.50155e-10	3.50155e-10	0		3.50155e-10	0		3.50155e-10	0		3.50155e-10	0
'EX_34dhpac(e)'	0	1.00044e-11	0	1.00044e-11	1.00044e-11	0		1.00044e-11	0		1.00044e-11	0		1.00044e-11	0
'EX_3amp(e)'	0	1.50067e-11	0	1.50067e-11	1.50067e-11	0		1.50067e-11	0		1.50067e-11	0		1.50067e-11	0
'EX_3cmp(e)'	0	1.50067e-11	0	1.50067e-11	1.50067e-11	0		1.50067e-11	0		1.50067e-11	0		1.50067e-11	0
'EX_3gmp(e)'	0	1.50067e-11	0	1.50067e-11	1.50067e-11	0		1.50067e-11	0		1.50067e-11	0		1.50067e-11	0
'EX_3hcinnm(e)'	0	1.00044e-11	0	1.00044e-11	1.00044e-11	0		1.00044e-11	0		1.00044e-11	0		1.00044e-11	0
'EX_3hpppn(e)'	0	1.00044e-11	0	1.00044e-11	1.00044e-11	0		1.00044e-11	0		1.00044e-11	0		1.00044e-11	0
'EX_3ump(e)'	0	1.50067e-11	0	1.50067e-11	1.50067e-11	0		1.50067e-11	0		1.50067e-11	0		1.50067e-11	0
'EX_4abut(e)'	0	-1.00044e-11	0	-1.00044e-11	-1.00044e-11	0		-1.00044e-11	0		-1.00044e-11	0		-1.00044e-11	0
'EX_4hoxpacd(e)'	0	1.00044e-11	0	1.00044e-11	1.00044e-11	0		1.00044e-11	0		1.00044e-11	0		1.00044e-11	0
'EX_5dglcn(e)'	0	-3.00133e-11	0	-3.00133e-11	-3.00133e-11	0		-3.00133e-11	0		-3.00133e-11	0		-3.00133e-11	0
'EX_LalaDgluMdapDala(e)'	0	-1.00044e-11	0	-1.00044e-11	-1.00044e-11	0		-1.00044e-11	0		-1.00044e-11	0		-1.00044e-11	0
'EX_LalaDgluMdap(e)'	0	-1.00044e-11	0	-1.00044e-11	-1.00044e-11	0		-1.00044e-11	0		-1.00044e-11	0		-1.00044e-11	0
'EX_ac(e)'	1.67586	-1.00044e-11	0	-1.00044e-11	-1.00044e-11	0		22.727	23.5282		-1.00044e-11	0		-1.00044e-11	0
'EX_acac(e)'	0	1.00044e-11	0	1.00044e-11	1.00044e-11	0		1.00044e-11	0		1.00044e-11	0		1.00044e-11	0
'EX_acald(e)'	0	-3.00133e-11	0	-3.00133e-11	-3.00133e-11	0		-3.00133e-11	0		-3.00133e-11	0		-3.00133e-11	0
'EX_acgal1p(e)'	0	1.50067e-11	0	1.50067e-11	1.50067e-11	0		1.50067e-11	0		1.50067e-11	0		1.50067e-11	0
'EX_acgal(e)'	0	3.00133e-11	0	3.00133e-11	3.00133e-11	0		3.00133e-11	0		3.00133e-11	0		3.00133e-11	0
'EX_acgam1p(e)'	0	1.50067e-11	0	1.50067e-11	1.50067e-11	0		1.50067e-11	0		1.50067e-11	0		1.50067e-11	0
'EX_acgam(e)'	0	3.00133e-11	0	3.00133e-11	3.00133e-11	0		3.00133e-11	0		3.00133e-11	0		3.00133e-11	0
'EX_acmana(e)'	0	5.00832e-26	0	5.00832e-26	5.00832e-26	0		5.00832e-26	0		5.00832e-26	0		5.00832e-26	0
'EX_acmum(e)'	0	0	0	0	0	0		0	0		0	0		0	0
'EX_acnam(e)'	0	5.00832e-26	0	5.00832e-26	5.00832e-26	0		5.00832e-26	0		5.00832e-26	0		5.00832e-26	0
'EX_acolipa(e)'	0	0	0	0	0	0		0	0		0	0		0	0
'EX_acser(e)'	0	0	0	0	0	0		0	0		0	0		0	0
'EX_ade(e)'	0	-3.00133e-11	0	-3.00133e-11	-3.00133e-11	0		-3.00133e-11	0		-3.00133e-11	0		-3.00133e-11	0
'EX_adn(e)'	0	-8.50378e-11	0	-8.50378e-11	-8.50378e-11	0		-8.50378e-11	0		-8.50378e-11	0		-8.50378e-11	0
'EX_adocbl(e)'	0	0	0	0	0	0		0	0		0	0		0	0
'EX_ag(e)'	0	0	0	0	0	0		0	0		0	0		0	0
'EX_agm(e)'	0	-1.00044e-11	0	-1.00044e-11	-1.00044e-11	0		-1.00044e-11	0		-1.00044e-11	0		-1.00044e-11	0
'EX_akg(e)'	0	-3.00133e-11	0	-3.00133e-11	-3.00133e-11	0		-3.00133e-11	0		-3.00133e-11	0		-3.00133e-11	0
'EX_ala_B(e)'	0	5.00832e-26	0	5.00832e-26	5.00832e-26	0		5.00832e-26	0		5.00832e-26	0		5.00832e-26	0
'EX_ala_D(e)'	0	-1.00044e-11	0	-1.00044e-11	-1.00044e-11	0		-1.00044e-11	0		-1.00044e-11	0		-1.00044e-11	0
'EX_ala_L(e)'	0	5.00832e-26	0	5.00832e-26	5.00832e-26	0		5.00832e-26	0		5.00832e-26	0		5.00832e-26	0
'EX_alaala(e)'	0	-1.00044e-11	0	-1.00044e-11	-1.00044e-11	0		-1.00044e-11	0		-1.00044e-11	0		-1.00044e-11	0
'EX_all_D(e)'	0	5.00832e-26	0	5.00832e-26	5.00832e-26	0		5.00832e-26	0		5.00832e-26	0		5.00832e-26	0
'EX_alltn(e)'	0	-3.00133e-11	0	-3.00133e-11	-3.00133e-11	0		0	0		-3.00133e-11	0		-3.00133e-11	0
'EX_amp(e)'	0	5.00832e-26	0	5.00832e-26	5.00832e-26	0		5.00832e-26	0		5.00832e-26	0		5.00832e-26	0
'EX_anhgm(e)'	0	-1.00044e-11	0	-1.00044e-11	-1.00044e-11	0		-1.00044e-11	0		-1.00044e-11	0		-1.00044e-11	0
'EX_arab_L(e)'	0	-5.00222e-12	0	-5.00222e-12	-5.00222e-12	0		-5.00222e-12	0		-5.00222e-12	0		-5.00222e-12	0
'EX_arbtn(e)'	0	0	0	0	0	0		0	0		0	0		0	0
'EX_arbtn_fe3(e)'	0	0	0	0	0	0		0	0		0	0		0	0
'EX_arg_L(e)'	0	-1.00044e-11	0	-1.00044e-11	-1.00044e-11	0		-1.00044e-11	0		-1.00044e-11	0		-1.00044e-11	0
'EX_ascb_L(e)'	0	5.00832e-26	0	5.00832e-26	5.00832e-26	0		5.00832e-26	0		5.00832e-26	0		5.00832e-26	0
'EX_asn_L(e)'	0	-1.00044e-11	0	-1.00044e-11	-1.00044e-11	0		-1.00044e-11	0		-1.00044e-11	0		-1.00044e-11	0
'EX_aso3(e)'	0	0	0	0	0	0		0	0		0	0		0	0
'EX_asp_L(e)'	0	-1.00044e-11	0	-1.00044e-11	-1.00044e-11	0		-1.00044e-11	0		-1.00044e-11	0		-1.00044e-11	0
'EX_but(e)'	0	1.74483e-25	0	1.74483e-25	1.74483e-25	0		1.74483e-25	0		1.74483e-25	0		1.74483e-25	0
'EX_butso3(e)'	0	5.00832e-26	0	5.00832e-26	5.00832e-26	0		5.00832e-26	0		5.00832e-26	0		5.00832e-26	0
'EX_ca2(e)'	-0.00419495	-0.000555803	-0.000555803	-3.35946e-11	-0.000474524	-0.000476303		-0.000690286	-0.000503121		-0.000614565	-0.000512818		-0.000601709	-0.000655049
'EX_cbi(e)'	0	0	0	0	0	0		0	0		0	0		0	0
'EX_cbl1(e)'	0	-1.50067e-11	0	-1.50067e-11	-1.50067e-11	0		-1.50067e-11	0		-1.50067e-11	0		-1.50067e-11	0
'EX_cd2(e)'	0	0	0	0	0	0		0	0		0	0		0	0
'EX_cgly(e)'	0	-1.00044e-11	0	-1.00044e-11	-1.00044e-11	0		-1.00044e-11	0		-1.00044e-11	0		-1.00044e-11	0
'EX_chol(e)'	0	1.00044e-11	0	1.00044e-11	1.00044e-11	0		1.00044e-11	0		1.00044e-11	0		1.00044e-11	0
'EX_cit(e)'	0	5.00832e-26	0	5.00832e-26	5.00832e-26	0		5.00832e-26	0		5.00832e-26	0		5.00832e-26	0
'EX_cl(e)'	-0.00419495	-0.000555803	-0.000555803	-3.35946e-11	-0.000474524	-0.000476303		-0.000690286	-0.000503121		-0.000614565	-0.000512818		-0.000601709	-0.000655049
'EX_cmp(e)'	0	5.00832e-26	0	5.00832e-26	5.00832e-26	0		5.00832e-26	0		5.00832e-26	0		5.00832e-26	0
'EX_co2(e)'	20.382	0	0	0	0.196289	0.197025		0	8.59428		1.13211	-0.0103659		13.4363	11.1354
'EX_cobalt2(e)'	-0.00279663	-0.000370535	-0.000370535	-2.23964e-11	-0.000316349	-0.000317536		-0.000460191	-0.000335414		-0.00040971	-0.000341879		-0.000401139	-0.0004367
'EX_colipa(e)'	9.51048e-30	-1.75089e-11	0	-1.75089e-11	-1.75089e-11	0		0	0		0	0		-1.75089e-11	0
'EX_cpgn(e)'	0	0	0	0	0	0		0	0		0	0		0	0
'EX_cpgn_un(e)'	0	0	0	0	0	0		0	0		0	0		0	0
'EX_crn(e)'	0	-5.00222e-12	0	-5.00222e-12	-5.00222e-12	0		-5.00222e-12	0		-5.00222e-12	0		-5.00222e-12	0
'EX_csn(e)'	0	5.00832e-26	0	5.00832e-26	5.00832e-26	0		5.00832e-26	0		5.00832e-26	0		5.00832e-26	0
'EX_cu2(e)'	-0.00279663	-0.000370535	-0.000370535	-2.38748e-12	-0.000316349	-0.000317536		-0.000460191	-0.000335414		-0.00040971	-0.000341879		-0.000401139	-0.0004367
'EX_cu(e)'	0	1.00166e-25	0	1.00166e-25	1.00166e-25	0		1.00166e-25	0		1.00166e-25	0		1.00166e-25	0
'EX_cyan(e)'	0	5.00832e-26	0	5.00832e-26	5.00832e-26	0		5.00832e-26	0		5.00832e-26	0		5.00832e-26	0
'EX_cynt(e)'	0	5.00832e-26	0	5.00832e-26	5.00832e-26	0		5.00832e-26	0		5.00832e-26	0		5.00832e-26	0
'EX_cys_D(e)'	0	5.00832e-26	0	5.00832e-26	5.00832e-26	0		5.00832e-26	0		5.00832e-26	0		5.00832e-26	0
'EX_cys_L(e)'	0	-1.00044e-11	0	-1.00044e-11	-1.00044e-11	0		-1.00044e-11	0		-1.00044e-11	0		-1.00044e-11	0
'EX_cytd(e)'	0	-8.50378e-11	0	-8.50378e-11	-8.50378e-11	0		-8.50378e-11	0		-8.50378e-11	0		-8.50378e-11	0
'EX_dad_2(e)'	0	1.50067e-11	0	1.50067e-11	1.50067e-11	0		1.50067e-11	0		1.50067e-11	0		1.50067e-11	0
'EX_damp(e)'	0	5.00832e-26	0	5.00832e-26	5.00832e-26	0		5.00832e-26	0		5.00832e-26	0		5.00832e-26	0
'EX_dca(e)'	0	5.00832e-26	0	5.00832e-26	5.00832e-26	0		5.00832e-26	0		5.00832e-26	0		5.00832e-26	0
'EX_dcmp(e)'	0	5.00832e-26	0	5.00832e-26	5.00832e-26	0		5.00832e-26	0		5.00832e-26	0		5.00832e-26	0
'EX_dcyt(e)'	0	1.50067e-11	0	1.50067e-11	1.50067e-11	0		1.50067e-11	0		1.50067e-11	0		1.50067e-11	0
'EX_ddca(e)'	0	0	0	0	0	0		0	0		0	0		0	0
'EX_dgmp(e)'	0	5.00832e-26	0	5.00832e-26	5.00832e-26	0		5.00832e-26	0		5.00832e-26	0		5.00832e-26	0
'EX_dgsn(e)'	0	1.50067e-11	0	1.50067e-11	1.50067e-11	0		1.50067e-11	0		1.50067e-11	0		1.50067e-11	0
'EX_dha(e)'	0	-3.00133e-11	0	-3.00133e-11	-3.00133e-11	0		-3.00133e-11	0		-3.00133e-11	0		-3.00133e-11	0
'EX_dimp(e)'	0	5.00832e-26	0	5.00832e-26	5.00832e-26	0		5.00832e-26	0		5.00832e-26	0		5.00832e-26	0
'EX_din(e)'	0	1.50067e-11	0	1.50067e-11	1.50067e-11	0		1.50067e-11	0		1.50067e-11	0		1.50067e-11	0
'EX_dms(e)'	0	2.00089e-11	0	2.00089e-11	2.00089e-11	0		2.00089e-11	0		2.00089e-11	0		2.00089e-11	0
'EX_dmso(e)'	0	5.00832e-26	0	5.00832e-26	5.00832e-26	0		5.00832e-26	0		5.00832e-26	0		5.00832e-26	0
'EX_dopa(e)'	0	5.00832e-26	0	5.00832e-26	5.00832e-26	0		5.00832e-26	0		5.00832e-26	0		5.00832e-26	0
'EX_dtmp(e)'	0	5.00832e-26	0	5.00832e-26	5.00832e-26	0		5.00832e-26	0		5.00832e-26	0		5.00832e-26	0
'EX_dump(e)'	0	5.00832e-26	0	5.00832e-26	5.00832e-26	0		5.00832e-26	0		5.00832e-26	0		5.00832e-26	0
'EX_duri(e)'	0	1.50067e-11	0	1.50067e-11	1.50067e-11	0		1.50067e-11	0		1.50067e-11	0		1.50067e-11	0
'EX_eca4colipa(e)'	-9.51119e-30	0	0	0	0	0		0	0		0	0		0	0
'EX_enlipa(e)'	0	0	0	0	0	0		0	0		0	0		0	0
'EX_enter(e)'	0	1.66741e-12	0	1.66741e-12	0	0		1.66741e-12	0		1.66741e-12	0		0	0
'EX_etha(e)'	0	-1.00044e-11	0	-1.00044e-11	-1.00044e-11	0		-1.00044e-11	0		-1.00044e-11	0		-1.00044e-11	0
'EX_ethso3(e)'	0	5.00832e-26	0	5.00832e-26	5.00832e-26	0		5.00832e-26	0		5.00832e-26	0		5.00832e-26	0
'EX_etoh(e)'	0	-5.00222e-11	0	-5.00222e-11	-5.00222e-11	0		-5.00222e-11	0		-5.00222e-11	0		4.6374	6.76753
'EX_f6p(e)'	0	5.00832e-26	0	5.00832e-26	5.00832e-26	0		5.00832e-26	0		5.00832e-26	0		5.00832e-26	0
'EX_fald(e)'	0	9.004e-11	0	9.004e-11	9.004e-11	0		9.004e-11	0		9.004e-11	0		9.004e-11	0
'EX_fe2(e)'	-0.00668783	-0.000886094	-0.000886094	-5.34395e-11	-0.000756514	-0.000759351		-0.00110049	-0.000802104		-0.000979774	5.6817		24.2887	16.0197
'EX_fe3(e)'	-0.00629287	-0.000833763	-0.000833763	-4.02673e-11	-0.000711836	-0.000714505		-0.0010355	-0.000754734		-0.000921912	-5.68329		-24.2905	-16.0218
'EX_fe3dcit(e)'	0	0	0	0	0	0		0	0		0	0		0	0
'EX_fe3dhbzs(e)'	0	0	0	0	0	0		0	0		0	0		0	0
'EX_fe3hox(e)'	0	0	0	0	0	0		0	0		0	0		0	0
'EX_fe3hox_un(e)'	0	0	0	0	0	0		0	0		0	0		0	0
'EX_fecrm(e)'	0	0	0	0	0	0		0	0		0	0		0	0
'EX_fecrm_un(e)'	0	0	0	0	0	0		0	0		0	0		0	0
'EX_feenter(e)'	0	0	0	0	0	0		0	0		0	0		0	0
'EX_feoxam(e)'	0	0	0	0	0	0		0	0		0	0		0	0
'EX_feoxam_un(e)'	0	0	0	0	0	0		0	0		0	0		0	0
'EX_for(e)'	0.00217231	15.3291	15.3291	1.09401e-06	-1.00044e-11	0		8.57851	0		17.0199	18.8398		32.0872	29.6667
'EX_fru(e)'	0	5.00832e-26	0	5.00832e-26	5.00832e-26	0		5.00832e-26	0		5.00832e-26	0		5.00832e-26	0
'EX_frulys(e)'	0	5.00832e-26	0	5.00832e-26	5.00832e-26	0		5.00832e-26	0		5.00832e-26	0		5.00832e-26	0
'EX_fruur(e)'	0	1.70076e-10	0	1.70076e-10	1.70076e-10	0		1.70076e-10	0		1.70076e-10	0		1.70076e-10	0
'EX_fuc_L(e)'	0	2.00089e-11	0	2.00089e-11	2.00089e-11	0		2.00089e-11	0		2.00089e-11	0		2.00089e-11	0
'EX_fum(e)'	0	-1.00044e-11	0	-1.00044e-11	-1.00044e-11	0		-1.00044e-11	0		-1.00044e-11	0		-1.00044e-11	0
'EX_g1p(e)'	0	1.50067e-11	0	1.50067e-11	1.50067e-11	0		1.50067e-11	0		1.50067e-11	0		1.50067e-11	0
'EX_g3pc(e)'	0	5.00832e-26	0	5.00832e-26	5.00832e-26	0		5.00832e-26	0		5.00832e-26	0		5.00832e-26	0
'EX_g3pe(e)'	0	-1.00044e-11	0	-1.00044e-11	-1.00044e-11	0		-1.00044e-11	0		-1.00044e-11	0		-1.00044e-11	0
'EX_g3pg(e)'	0	-1.00044e-11	0	-1.00044e-11	-1.00044e-11	0		-1.00044e-11	0		-1.00044e-11	0		-1.00044e-11	0
'EX_g3pi(e)'	0	5.00832e-26	0	5.00832e-26	5.00832e-26	0		5.00832e-26	0		5.00832e-26	0		5.00832e-26	0
'EX_g3ps(e)'	0	5.00832e-26	0	5.00832e-26	5.00832e-26	0		5.00832e-26	0		5.00832e-26	0		5.00832e-26	0
'EX_g6p(e)'	0	5.00832e-26	0	5.00832e-26	5.00832e-26	0		5.00832e-26	0		5.00832e-26	0		5.00832e-26	0
'EX_gal1p(e)'	0	1.50067e-11	0	1.50067e-11	1.50067e-11	0		1.50067e-11	0		1.50067e-11	0		1.50067e-11	0
'EX_gal(e)'	0	5.00832e-26	0	5.00832e-26	5.00832e-26	0		5.00832e-26	0		5.00832e-26	0		5.00832e-26	0
'EX_gal_bD(e)'	0	-6.50289e-11	0	-6.50289e-11	-6.50289e-11	0		-6.50289e-11	0		-6.50289e-11	0		-6.50289e-11	0
'EX_galct_D(e)'	0	1.00044e-11	0	1.00044e-11	1.00044e-11	0		1.00044e-11	0		1.00044e-11	0		1.00044e-11	0
'EX_galctn_D(e)'	0	5.00832e-26	0	5.00832e-26	5.00832e-26	0		5.00832e-26	0		5.00832e-26	0		5.00832e-26	0
'EX_galctn_L(e)'	0	5.00832e-26	0	5.00832e-26	5.00832e-26	0		5.00832e-26	0		5.00832e-26	0		5.00832e-26	0
'EX_galt(e)'	0	5.00832e-26	0	5.00832e-26	5.00832e-26	0		5.00832e-26	0		5.00832e-26	0		5.00832e-26	0
'EX_galur(e)'	0	1.10049e-10	0	1.10049e-10	1.10049e-10	0		1.10049e-10	0		1.10049e-10	0		1.10049e-10	0
'EX_gam6p(e)'	0	5.00832e-26	0	5.00832e-26	5.00832e-26	0		5.00832e-26	0		5.00832e-26	0		5.00832e-26	0
'EX_gam(e)'	0	5.00832e-26	0	5.00832e-26	5.00832e-26	0		5.00832e-26	0		5.00832e-26	0		5.00832e-26	0
'EX_gbbtn(e)'	0	0	0	0	0	0		0	0		0	0		0	0
'EX_gdp(e)'	0	1.00044e-11	0	1.00044e-11	1.00044e-11	0		1.00044e-11	0		1.00044e-11	0		1.00044e-11	0
'EX_glc(e)'	-10	-10	-10	0	-10	-10		-10	-10		-10	-10		-10	-10
'EX_glcn(e)'	0	-1.00044e-11	0	-1.00044e-11	-1.00044e-11	0		-1.00044e-11	0		-1.00044e-11	0		-1.00044e-11	0
'EX_glcr(e)'	0	1.00044e-11	0	1.00044e-11	1.00044e-11	0		1.00044e-11	0		1.00044e-11	0		1.00044e-11	0
'EX_glcur1p(e)'	0	1.50067e-11	0	1.50067e-11	1.50067e-11	0		1.50067e-11	0		1.50067e-11	0		1.50067e-11	0
'EX_glcur(e)'	0	1.70076e-10	0	1.70076e-10	1.70076e-10	0		1.70076e-10	0		1.70076e-10	0		1.70076e-10	0
'EX_gln_L(e)'	0	5.00832e-26	0	5.00832e-26	5.00832e-26	0		5.00832e-26	0		5.00832e-26	0		5.00832e-26	0
'EX_glu_L(e)'	0	-1.00044e-11	0	-1.00044e-11	-1.00044e-11	0		-1.00044e-11	0		-1.00044e-11	0		-1.00044e-11	0
'EX_gly(e)'	0	5.00832e-26	0	5.00832e-26	5.00832e-26	0		5.00832e-26	0		5.00832e-26	0		5.00832e-26	0
'EX_glyald(e)'	0	-5.00222e-11	0	-5.00222e-11	-5.00222e-11	0		-5.00222e-11	0		-5.00222e-11	0		-5.00222e-11	0
'EX_glyb(e)'	0	5.00832e-26	0	5.00832e-26	5.00832e-26	0		5.00832e-26	0		5.00832e-26	0		5.00832e-26	0
'EX_glyc2p(e)'	0	5.00832e-26	0	5.00832e-26	5.00832e-26	0		5.00832e-26	0		5.00832e-26	0		5.00832e-26	0
'EX_glyc3p(e)'	0	-1.00044e-11	0	-1.00044e-11	-1.00044e-11	0		-1.00044e-11	0		-1.00044e-11	0		-1.00044e-11	0
'EX_glyc(e)'	0	-3.00133e-11	0	-3.00133e-11	-3.00133e-11	0		-3.00133e-11	0		-3.00133e-11	0		-3.00133e-11	0
'EX_glyc_R(e)'	0	-1.00044e-11	0	-1.00044e-11	-1.00044e-11	0		-1.00044e-11	0		-1.00044e-11	0		-1.00044e-11	0
'EX_glyclt(e)'	0	-1.00044e-11	0	-1.00044e-11	6.70164e-05	6.72677e-05		9.72584e-05	0		18.2676	18.3687		8.26089e-05	9.25117e-05
'EX_gmp(e)'	0	5.00832e-26	0	5.00832e-26	5.00832e-26	0		5.00832e-26	0		5.00832e-26	0		5.00832e-26	0
'EX_gsn(e)'	0	1.00044e-10	0	1.00044e-10	1.00044e-10	0		1.00044e-10	0		1.00044e-10	0		1.00044e-10	0
'EX_gthox(e)'	0	1.00044e-11	0	1.00044e-11	1.00044e-11	0		1.00044e-11	0		1.00044e-11	0		1.00044e-11	0
'EX_gthrd(e)'	0	-1.00044e-11	0	-1.00044e-11	-1.00044e-11	0		-1.00044e-11	0		-1.00044e-11	0		-1.00044e-11	0
'EX_gtp(e)'	0	5.00832e-26	0	5.00832e-26	5.00832e-26	0		5.00832e-26	0		5.00832e-26	0		5.00832e-26	0
'EX_gua(e)'	0	-1.00044e-11	0	-1.00044e-11	-1.00044e-11	0		-1.00044e-11	0		-1.00044e-11	0		-1.00044e-11	0
'EX_h2(e)'	0	2.50111e-11	0	2.50111e-11	2.50111e-11	0		2.50111e-11	0		2.50111e-11	0		2.50111e-11	0
'EX_h2o2(e)'	0	3.00133e-11	0	3.00133e-11	3.00133e-11	0		3.00133e-11	0		3.00133e-11	0		3.00133e-11	0
'EX_h2o(e)'	43.7089	13.0572	13.0572	-1.68122e-07	2.86841	2.87916		3.83847	11.392		4.54952	0		0	0
'EX_h2s(e)'	0	0	0	0	0	0		0	0		0	0		0	0
'EX_h(e)'	9.81144	36.3398	36.3398	4.73354e-07	19.5095	19.5076		32.644	24.5037		36.4791	43.8853		57.5435	46.9576
'EX_hacolipa(e)'	0	0	0	0	0	0		0	0		0	0		0	0
'EX_halipa(e)'	0	0	0	0	0	0		0	0		0	0		0	0
'EX_hdca(e)'	0	0	0	0	0	0		0	0		0	0		0	0
'EX_hdcea(e)'	0	0	0	0	0	0		0	0		0	0		0	0
'EX_hg2(e)'	0	1.00044e-11	0	1.00044e-11	1.00044e-11	0		1.00044e-11	0		1.00044e-11	0		1.00044e-11	0
'EX_his_L(e)'	0	-1.00044e-11	0	-1.00044e-11	-1.00044e-11	0		-1.00044e-11	0		-1.00044e-11	0		-1.00044e-11	0
'EX_hom_L(e)'	0	0	0	0	0	0		0	0		0	0		0	0
'EX_hxa(e)'	-8.87879e-28	-1.00044e-11	0	-1.00044e-11	-1.00044e-11	0		-1.00044e-11	0		-1.00044e-11	0		-1.00044e-11	0
'EX_hxan(e)'	0	-3.00133e-11	0	-3.00133e-11	-3.00133e-11	0		-3.00133e-11	0		-3.00133e-11	0		-3.00133e-11	0
'EX_idon_L(e)'	0	-3.00133e-11	0	-3.00133e-11	-3.00133e-11	0		-3.00133e-11	0		-3.00133e-11	0		-3.00133e-11	0
'EX_ile_L(e)'	0	-1.00044e-11	0	-1.00044e-11	-1.00044e-11	0		-1.00044e-11	0		-1.00044e-11	0		-1.00044e-11	0
'EX_imp(e)'	0	5.00832e-26	0	5.00832e-26	5.00832e-26	0		5.00832e-26	0		5.00832e-26	0		5.00832e-26	0
'EX_indole(e)'	0	-1.00044e-11	0	-1.00044e-11	-1.00044e-11	0		-1.00044e-11	0		-1.00044e-11	0		-1.00044e-11	0
'EX_inost(e)'	0	1.50067e-11	0	1.50067e-11	1.50067e-11	0		1.50067e-11	0		1.50067e-11	0		1.50067e-11	0
'EX_ins(e)'	0	-5.00222e-11	0	-5.00222e-11	-5.00222e-11	0		-5.00222e-11	0		-5.00222e-11	0		-5.00222e-11	0
'EX_isetac(e)'	0	5.00832e-26	0	5.00832e-26	5.00832e-26	0		5.00832e-26	0		5.00832e-26	0		5.00832e-26	0
'EX_k(e)'	-0.157277	-0.0208382	-0.0208382	-1.25743e-09	-0.0177909	-0.0178576		-0.0258803	-0.018863		-0.0230413	-0.0192266		-0.0225593	-0.0245592
'EX_kdo2lipid4(e)'	0	0	0	0	0	0		0	0		0	0		-4.33681e-19	0
'EX_lac_D(e)'	0	-3.00133e-11	0	-3.00133e-11	18.5225	18.517		-3.00133e-11	0		-3.00133e-11	0		-3.00133e-11	0
'EX_lac_L(e)'	0	1.30058e-10	0	1.30058e-10	1.30058e-10	0		1.30058e-10	0		1.30058e-10	0		1.30058e-10	0
'EX_lcts(e)'	0	1.75078e-11	0	1.75078e-11	1.75078e-11	0		1.75078e-11	0		1.75078e-11	0		1.75078e-11	0
'EX_leu_L(e)'	0	-1.00044e-11	0	-1.00044e-11	-1.00044e-11	0		-1.00044e-11	0		-1.00044e-11	0		-1.00044e-11	0
'EX_lipa(e)'	0	0	0	0	0	0		0	0		0	0		0	0
'EX_lipa_cold(e)'	-6.70504e-30	0	0	0	0	0		0	0		0	0		0	0
'EX_lys_L(e)'	0	-1.00044e-11	0	-1.00044e-11	-1.00044e-11	0		-1.00044e-11	0		-1.00044e-11	0		-1.00044e-11	0
'EX_lyx_L(e)'	0	5.00832e-26	0	5.00832e-26	5.00832e-26	0		5.00832e-26	0		5.00832e-26	0		5.00832e-26	0
'EX_mal_D(e)'	0	5.00832e-26	0	5.00832e-26	5.00832e-26	0		5.00832e-26	0		5.00832e-26	0		5.00832e-26	0
'EX_mal_L(e)'	0	5.00832e-26	0	5.00832e-26	5.00832e-26	0		5.00832e-26	0		5.00832e-26	0		5.00832e-26	0
'EX_malt(e)'	0	0	0	0	0	0		0	0		0	0		0	0
'EX_malthx(e)'	0	0	0	0	0	0		0	0		0	0		0	0
'EX_maltpt(e)'	0	0	0	0	0	0		0	0		0	0		0	0
'EX_malttr(e)'	0	0	0	0	0	0		0	0		0	0		0	0
'EX_maltttr(e)'	0	0	0	0	0	0		0	0		0	0		0	0
'EX_man6p(e)'	0	5.00832e-26	0	5.00832e-26	5.00832e-26	0		5.00832e-26	0		5.00832e-26	0		5.00832e-26	0
'EX_man(e)'	0	5.00832e-26	0	5.00832e-26	5.00832e-26	0		5.00832e-26	0		5.00832e-26	0		5.00832e-26	0
'EX_manglyc(e)'	0	5.00832e-26	0	5.00832e-26	5.00832e-26	0		5.00832e-26	0		5.00832e-26	0		5.00832e-26	0
'EX_melib(e)'	0	-5.00222e-12	0	-5.00222e-12	-5.00222e-12	0		-5.00222e-12	0		-5.00222e-12	0		-5.00222e-12	0
'EX_met_D(e)'	0	0	0	0	0	0		0	0		0	0		0	0
'EX_met_L(e)'	0	5.00832e-26	0	5.00832e-26	5.00832e-26	0		5.00832e-26	0		5.00832e-26	0		5.00832e-26	0
'EX_metsox_R_L(e)'	0	5.00832e-26	0	5.00832e-26	5.00832e-26	0		5.00832e-26	0		5.00832e-26	0		5.00832e-26	0
'EX_metsox_S_L(e)'	0	5.00832e-26	0	5.00832e-26	5.00832e-26	0		5.00832e-26	0		5.00832e-26	0		5.00832e-26	0
'EX_mg2(e)'	-0.00699158	-0.000926339	-0.000926339	-5.58772e-11	-0.000790873	-0.000793839		-0.00115048	-0.000838534		-0.00102427	-0.000854697		-0.00100285	-0.00109175
'EX_minohp(e)'	0	0	0	0	0	0		0	0		0	0		0	0
'EX_mmet(e)'	0	5.00832e-26	0	5.00832e-26	5.00832e-26	0		5.00832e-26	0		5.00832e-26	0		5.00832e-26	0
'EX_mn2(e)'	-0.00279663	-0.000370535	-0.000370535	-2.23964e-11	-0.000316349	-0.000317536		-0.000460191	-0.000335414		-0.00040971	-0.000341879		-0.000401139	-0.0004367
'EX_mnl(e)'	0	5.00832e-26	0	5.00832e-26	5.00832e-26	0		5.00832e-26	0		5.00832e-26	0		5.00832e-26	0
'EX_mobd(e)'	-0.00279663	-0.000370535	-0.000370535	-2.23964e-11	-0.000316349	-0.000317536		-0.000460191	-0.000335414		-0.00040971	-0.000341879		-0.000401139	-0.0004367
'EX_mso3(e)'	0	5.00832e-26	0	5.00832e-26	5.00832e-26	0		5.00832e-26	0		5.00832e-26	0		5.00832e-26	0
'EX_n2o(e)'	0	1.00044e-11	0	1.00044e-11	1.00044e-11	0		1.00044e-11	0		1.00044e-11	0		1.00044e-11	0
'EX_na1(e)'	4.51665e-14	0	0	0	0	0		0	0		0	0		0	0
'EX_nac(e)'	0	5.00832e-26	0	5.00832e-26	5.00832e-26	0		5.00832e-26	0		5.00832e-26	0		5.00832e-26	0
'EX_nh4(e)'	-9.55004	-1.26532	-1.26532	-6.96632e-08	-1.08028	-1.08433		-1.57147	-1.14538		-1.39909	-1.16746		-1.36982	-1.49126
'EX_ni2(e)'	0	0	0	0	0	0		0	0		0	0		0	0
'EX_nmn(e)'	0	5.00832e-26	0	5.00832e-26	5.00832e-26	0		5.00832e-26	0		5.00832e-26	0		5.00832e-26	0
'EX_no2(e)'	0	-5.80258e-10	0	-5.80258e-10	4.00178e-10	0		4.00178e-10	0		4.00178e-10	0		4.00178e-10	0
'EX_no3(e)'	0	5.00832e-26	0	5.00832e-26	5.00832e-26	0		5.00832e-26	0		5.00832e-26	0		5.00832e-26	0
'EX_no(e)'	0	1.00044e-11	0	1.00044e-11	1.00044e-11	0		1.00044e-11	0		1.00044e-11	0		1.00044e-11	0
'EX_o16a4colipa(e)'	0	2.00089e-11	0	2.00089e-11	2.00089e-11	0		2.00089e-11	0		2.00089e-11	0		2.00089e-11	0
'EX_o2(e)'	-18.5	-12.3983	-12.3983	-3.59896e-07	-1.95364e-10	0		-3.97943	-8.36843		-18.5	-16.9431		-18.5	-14.902
'EX_o2s(e)'	0	0	0	0	0	0		0	0		0	0		0	0
'EX_ocdca(e)'	0	0	0	0	0	0		0	0		0	0		0	0
'EX_ocdcea(e)'	0	0	0	0	0	0		0	0		0	0		0	0
'EX_octa(e)'	0	5.00832e-26	0	5.00832e-26	5.00832e-26	0		5.00832e-26	0		5.00832e-26	0		5.00832e-26	0
'EX_orn(e)'	0	-1.00044e-11	0	-1.00044e-11	-1.00044e-11	0		-1.00044e-11	0		-1.00044e-11	0		-1.00044e-11	0
'EX_orot(e)'	0	5.00832e-26	0	5.00832e-26	5.00832e-26	0		5.00832e-26	0		5.00832e-26	0		5.00832e-26	0
'EX_pacald(e)'	0	1.00044e-11	0	1.00044e-11	1.00044e-11	0		1.00044e-11	0		1.00044e-11	0		1.00044e-11	0
'EX_peamn(e)'	0	5.00832e-26	0	5.00832e-26	5.00832e-26	0		5.00832e-26	0		5.00832e-26	0		5.00832e-26	0
'EX_phe_L(e)'	0	-4.00178e-11	0	-4.00178e-11	-4.00178e-11	0		-4.00178e-11	0		-4.00178e-11	0		-4.00178e-11	0
'EX_pheme(e)'	0	0	0	0	0	0		0	0		0	0		0	0
'EX_pi(e)'	-0.851314	-0.112793	-0.112793	-6.1251e-09	-0.0962988	-0.0966599		-0.140085	-0.102102		-0.124718	-0.10407		-0.122109	-0.132934
'EX_pnto_R(e)'	0	5.00832e-26	0	5.00832e-26	5.00832e-26	0		5.00832e-26	0		5.00832e-26	0		5.00832e-26	0
'EX_ppa(e)'	0	5.00832e-26	0	5.00832e-26	5.00832e-26	0		5.00832e-26	0		5.00832e-26	0		5.00832e-26	0
'EX_ppal(e)'	0	1.00044e-11	0	1.00044e-11	1.00044e-11	0		1.00044e-11	0		1.00044e-11	0		1.00044e-11	0
'EX_pppn(e)'	0	1.00044e-11	0	1.00044e-11	1.00044e-11	0		1.00044e-11	0		0	0		1.00044e-11	0
'EX_ppt(e)'	0	5.00832e-26	0	5.00832e-26	5.00832e-26	0		5.00832e-26	0		0	0		5.00832e-26	0
'EX_pro_L(e)'	0	-1.00044e-11	0	-1.00044e-11	-1.00044e-11	0		-1.00044e-11	0		0	0		-1.00044e-11	0
'EX_progly(e)'	0	5.00832e-26	0	5.00832e-26	5.00832e-26	0		5.00832e-26	0		0	0		5.00832e-26	0
'EX_psclys(e)'	0	5.00832e-26	0	5.00832e-26	5.00832e-26	0		5.00832e-26	0		0	0		5.00832e-26	0
'EX_pser_L(e)'	0	5.00832e-26	0	5.00832e-26	5.00832e-26	0		5.00832e-26	0		0	0		5.00832e-26	0
'EX_ptrc(e)'	0	-1.00044e-11	0	-1.00044e-11	-1.00044e-11	0		-1.00044e-11	0		0	0		-1.00044e-11	0
'EX_pyr(e)'	0	-3.00133e-11	0	-3.00133e-11	-3.00133e-11	0		-3.00133e-11	0		1.00044e-11	0		-3.00133e-11	0
'EX_r5p(e)'	0	5.00832e-26	0	5.00832e-26	5.00832e-26	0		5.00832e-26	0		1.00044e-11	0		5.00832e-26	0
'EX_rib_D(e)'	0	1.50067e-11	0	1.50067e-11	1.50067e-11	0		1.50067e-11	0		5.00222e-12	0		1.50067e-11	0
'EX_rmn(e)'	0	5.00832e-26	0	5.00832e-26	5.00832e-26	0		5.00832e-26	0		5.00222e-12	0		5.00832e-26	0
'EX_sbt_D(e)'	0	5.00832e-26	0	5.00832e-26	5.00832e-26	0		5.00832e-26	0		5.00222e-12	0		5.00832e-26	0
'EX_ser_D(e)'	0	5.00832e-26	0	5.00832e-26	5.00832e-26	0		5.00832e-26	0		0	0		5.00832e-26	0
'EX_ser_L(e)'	0	-1.00044e-11	0	-1.00044e-11	-1.00044e-11	0		-1.00044e-11	0		-5.00832e-26	0		-1.00044e-11	0
'EX_skm(e)'	0	5.00832e-26	0	5.00832e-26	5.00832e-26	0		5.00832e-26	0		-5.00832e-26	0		5.00832e-26	0
'EX_so2(e)'	0	0	0	0	0	0		0	0		-5.00832e-26	0		0	0
'EX_so3(e)'	0	1.50067e-11	0	1.50067e-11	1.50067e-11	0		1.50067e-11	0		-5.00832e-26	0		1.50067e-11	0
'EX_so4(e)'	-0.221614	-0.0293624	-0.0293624	-1.49177e-09	-0.0250685	-0.0251625		-0.036467	-0.0265793		1.00044e-11	-0.0270916		-0.0317875	-0.0346055
'EX_spmd(e)'	0	5.00832e-26	0	5.00832e-26	5.00832e-26	0		5.00832e-26	0		-5.00832e-26	0		5.00832e-26	0
'EX_succ(e)'	0	9.96653	9.96653	-3.38585e-07	0.0334318	0.0335571		-1.00044e-11	0		1.00044e-11	0		-1.00044e-11	0
'EX_sucr(e)'	0	5.00832e-26	0	5.00832e-26	5.00832e-26	0		5.00832e-26	0		1.00044e-11	0		5.00832e-26	0
'EX_sulfac(e)'	0	5.00832e-26	0	5.00832e-26	5.00832e-26	0		5.00832e-26	0		1.00044e-11	0		5.00832e-26	0
'EX_tartr_L(e)'	0	1.00044e-11	0	1.00044e-11	1.00044e-11	0		1.00044e-11	0		1.00044e-11	0		1.00044e-11	0
'EX_taur(e)'	0	5.00832e-26	0	5.00832e-26	5.00832e-26	0		5.00832e-26	0		-5.00832e-26	0		5.00832e-26	0
'EX_tcynt(e)'	0	1.50067e-11	0	1.50067e-11	1.50067e-11	0		1.50067e-11	0		0	0		1.50067e-11	0
'EX_thm(e)'	0	5.00832e-26	0	5.00832e-26	5.00832e-26	0		5.00832e-26	0		0	0		5.00832e-26	0
'EX_thr_L(e)'	0	-1.00044e-11	0	-1.00044e-11	-1.00044e-11	0		-1.00044e-11	0		0	0		-1.00044e-11	0
'EX_thrp(e)'	0	5.00832e-26	0	5.00832e-26	5.00832e-26	0		5.00832e-26	0		0	0		5.00832e-26	0
'EX_thym(e)'	0	-1.00044e-11	0	-1.00044e-11	-1.00044e-11	0		-1.00044e-11	0		0	0		-1.00044e-11	0
'EX_thymd(e)'	0	-5.00222e-11	0	-5.00222e-11	-5.00222e-11	0		-5.00222e-11	0		0	0		-5.00222e-11	0
'EX_tma(e)'	0	2.00089e-11	0	2.00089e-11	2.00089e-11	0		2.00089e-11	0		0	0		2.00089e-11	0
'EX_tmao(e)'	0	5.00832e-26	0	5.00832e-26	5.00832e-26	0		5.00832e-26	0		0	0		5.00832e-26	0
'EX_tre(e)'	0	5.00832e-26	0	5.00832e-26	5.00832e-26	0		5.00832e-26	0		0	0		5.00832e-26	0
'EX_trp_L(e)'	0	-3.00133e-11	0	-3.00133e-11	-3.00133e-11	0		-3.00133e-11	0		0	0		-3.00133e-11	0
'EX_tsul(e)'	0	5.00832e-26	0	5.00832e-26	5.00832e-26	0		5.00832e-26	0		0	0		5.00832e-26	0
'EX_ttdca(e)'	0	0	0	0	0	0		0	0		0	0		0	0
'EX_ttdcea(e)'	0	0	0	0	0	0		0	0		0	0		0	0
'EX_tungs(e)'	0	0	0	0	0	0		0	0		0	0		0	0
'EX_tym(e)'	0	5.00832e-26	0	5.00832e-26	5.00832e-26	0		5.00832e-26	0		0	0		5.00832e-26	0
'EX_tyr_L(e)'	0	-6.00267e-11	0	-6.00267e-11	-6.00267e-11	0		-6.00267e-11	0		0	0		-6.00267e-11	0
'EX_tyrp(e)'	0	5.00832e-26	0	5.00832e-26	5.00832e-26	0		5.00832e-26	0		0	0		5.00832e-26	0
'EX_uacgam(e)'	0	5.00832e-26	0	5.00832e-26	5.00832e-26	0		5.00832e-26	0		0	0		5.00832e-26	0
'EX_udpacgal(e)'	0	5.00832e-26	0	5.00832e-26	5.00832e-26	0		5.00832e-26	0		0	0		5.00832e-26	0
'EX_udpg(e)'	0	5.00832e-26	0	5.00832e-26	5.00832e-26	0		5.00832e-26	0		0	0		5.00832e-26	0
'EX_udpgal(e)'	0	5.00832e-26	0	5.00832e-26	5.00832e-26	0		5.00832e-26	0		0	0		5.00832e-26	0
'EX_udpglcur(e)'	0	5.00832e-26	0	5.00832e-26	5.00832e-26	0		5.00832e-26	0		0	0		5.00832e-26	0
'EX_ump(e)'	0	1.60071e-10	0	1.60071e-10	1.60071e-10	0		1.60071e-10	0		0	0		1.60071e-10	0
'EX_ura(e)'	0	-3.00133e-11	0	-3.00133e-11	-3.00133e-11	0		-3.00133e-11	0		0	0		-3.00133e-11	0
'EX_urea(e)'	0	1.00044e-11	0	1.00044e-11	1.00044e-11	0		1.00044e-11	0		0	0		1.00044e-11	0
'EX_uri(e)'	0	-2.45109e-10	0	-2.45109e-10	-2.45109e-10	0		-2.45109e-10	0		0	0		-2.45109e-10	0
'EX_val_L(e)'	0	-1.00044e-11	0	-1.00044e-11	-1.00044e-11	0		-1.00044e-11	0		0	0		-1.00044e-11	0
'EX_xan(e)'	0	-1.00044e-11	0	-1.00044e-11	-1.00044e-11	0		-1.00044e-11	0		0	0		-1.00044e-11	0
'EX_xmp(e)'	0	5.00832e-26	0	5.00832e-26	5.00832e-26	0		5.00832e-26	0		0	0		5.00832e-26	0
'EX_xtsn(e)'	0	-5.00222e-11	0	-5.00222e-11	-5.00222e-11	0		-5.00222e-11	0		0	0		-5.00222e-11	0
'EX_xyl_D(e)'	0	5.00832e-26	0	5.00832e-26	5.00832e-26	0		5.00832e-26	0		0	0		5.00832e-26	0
'EX_xylu_L(e)'	0	5.00832e-26	0	5.00832e-26	5.00832e-26	0		5.00832e-26	0		0	0		5.00832e-26	0
'EX_zn2(e)'	-0.00279663	-0.000370535	-0.000370535	-2.23964e-11	-0.000316349	-0.000317536		-0.000460191	-0.000335414		0	-0.000341879		-0.000401139	-0.0004367
'Ec_biomass_iAF1260_core_59p81M'	0.885571	0.117332	0.117332	7.08015e-09	0.100174	0.10055		0.145722	0.106211		0	0.108258		0.127023	0.138284
'F6PA'	0	-3.00133e-11	5.6622	-5.6622	-3.00133e-11	0		-3.00133e-11	0.0150074		0	0		-3.00133e-11	0
'F6PP'	0	0	0	0	0	0		0	0		0	0		0	0
'F6Pt6_2pp'	0	1.00044e-11	0	1.00044e-11	1.00044e-11	0		1.00044e-11	0		0	0		1.00044e-11	0
'F6Ptex'	0	-5.00832e-26	0	-5.00832e-26	-5.00832e-26	0		-5.00832e-26	0		5.00222e-12	0		-5.00832e-26	0
'FA100ACPHi'	1.78212e-27	0	0	0	0	0		0	0		5.00222e-12	0		0	0
'FA120ACPHi'	0	0	0	0	0	0		0	0		0	0		0	0
'FA140ACPHi'	0	0	0	0	0	0		0	0		-1.00044e-11	0		0	0
'FA141ACPHi'	0	0	0	0	0	0		0	0		-1.50067e-11	0		0	0
'FA160ACPHi'	0	0	0	0	0	0		0	0		-1.50067e-11	0		0	0
'FA161ACPHi'	0	0	0	0	0	0		0	0		-1.50067e-11	0		0	0
'FA80ACPHi'	-4.96944e-30	0	0	0	0	0		0	0		0.0461657	0		0	0
'FACOAE100'	-1.77366e-27	3.00133e-11	0	3.00133e-11	3.00133e-11	0		3.00133e-11	0		0.0266506	0		3.00133e-11	0
'FACOAE120'	0	0	0	0	0	0		0	0		0.0195151	0		0	0
'FACOAE140'	0	0	0	0	0	0		0	0		0.016557	0		0	0
'FACOAE141'	0	0	0	0	0	0		0	0		0.0195151	0		-6.00267e-11	0
'FACOAE160'	0	0	0	0	0	0		0	0		0.016557	0		0	0
'FACOAE161'	0	0	0	0	0	0		0	0		0.0195151	0		0	0
'FACOAE180'	0	0	0	0	0	0		0	0		0	0		0	0
'FACOAE181'	0	0	0	0	0	0		0	0		0	0		0	0
'FACOAE60'	0	-1.00044e-11	0	-1.00044e-11	-1.00044e-11	0		-1.00044e-11	0		0.0461657	0		-1.00044e-11	0
'FACOAE80'	3.58149e-30	0	0	0	0	0		0	0		0.0461657	0		0	0
'FACOAL100t2pp'	0	1.00044e-11	0	1.00044e-11	1.00044e-11	0		1.00044e-11	0		0.0461657	0		1.00044e-11	0
'FACOAL120t2pp'	-1.76769e-27	0	0	0	0	0		0	0		1.00044e-11	0		0	0
'FACOAL140t2pp'	0	0	0	0	0	0		0	0		1.00044e-11	0		0	0
'FACOAL141t2pp'	1.58907e-33	0	0	0	0	0		0	0		0	0		-6.00267e-11	0
'FACOAL160t2pp'	0	0	0	0	0	0		0	0		2.50111e-11	0		0	0
'FACOAL161t2pp'	0	0	0	0	0	0		0	0		2.50111e-11	0		0	0
'FACOAL180t2pp'	0	0	0	0	0	0		0	0		2.50111e-11	0		0	0
'FACOAL181t2pp'	0	0	0	0	0	0		0	0		2.50111e-11	0		0	0
'FACOAL60t2pp'	0	0	0	0	0	0		0	0		0.0461657	0		0	0
'FACOAL80t2pp'	0	1.00044e-11	0	1.00044e-11	1.00044e-11	0		1.00044e-11	0		0.0266506	0		1.00044e-11	0
'FADRx'	0	0	0	0	0	0		0	0		0.0195151	0		12.1448	8.01039
'FADRx2'	0	0	0	0	0	0		0	0		0.0266506	0		0	0
'FALDH2'	0	-1.00044e-11	0	-1.00044e-11	-1.00044e-11	0		-1.00044e-11	0		0.0195151	0		-1.00044e-11	0
'FALDtex'	0	-9.004e-11	0	-9.004e-11	-9.004e-11	0		-9.004e-11	0		0.016557	0		-9.004e-11	0
'FALDtpp'	0	-9.004e-11	0	-9.004e-11	-9.004e-11	0		-9.004e-11	0		0.0195151	0		-9.004e-11	0
'FALGTHLs'	0	-3.00133e-11	0	-3.00133e-11	-3.00133e-11	0		-3.00133e-11	0		0	0		-3.00133e-11	0
'FBA'	7.64384	9.89835	4.23616	5.6622	8.26559	8.47249		1.00044e-11	0		0	0		9.88996	9.8802
'FBP'	0	0	0	0	0	0		0	0		0.0461657	0		0	0
'FCI'	0	5.16988e-26	0	5.16988e-26	5.16988e-26	0		5.16988e-26	0		0.0461657	0		5.16988e-26	0
'FCLK'	0	5.16988e-26	0	5.16988e-26	5.16988e-26	0		5.16988e-26	0		0.0461657	0		5.16988e-26	0
'FCLPA'	0	5.16988e-26	0	5.16988e-26	5.16988e-26	0		5.16988e-26	0		0.0461657	0		5.16988e-26	0
'FCLT'	0.000197482	2.61651e-05	2.61651e-05	1.57887e-12	2.23388e-05	2.24226e-05		3.24961e-05	2.3685e-05		0.0266506	2.41415e-05		2.83262e-05	3.08372e-05
'FDH4pp'	0	0	0	0	0	0		0	0		0.0195151	0		0	0
'FDH5pp'	0	0	0	0	0	0		0	0		0.0266506	0		0	0
'FDMO'	0	1.00044e-11	0	1.00044e-11	1.00044e-11	0		1.00044e-11	0		0.0195151	0		1.00044e-11	0
'FDMO2'	0	1.00044e-11	0	1.00044e-11	1.00044e-11	0		1.00044e-11	0		0.016557	0		1.00044e-11	0
'FDMO3'	0	1.00044e-11	0	1.00044e-11	1.00044e-11	0		1.00044e-11	0		0.0195151	0		1.00044e-11	0
'FDMO4'	0	1.00044e-11	0	1.00044e-11	1.00044e-11	0		1.00044e-11	0		0	0		1.00044e-11	0
'FDMO6'	0	1.00044e-11	0	1.00044e-11	1.00044e-11	0		1.00044e-11	0		0	0		1.00044e-11	0
'FE2abcpp'	0	0	0	0	0	0		0	0		0.0461657	0		0	0
'FE2t2pp'	0	0	0	0	0	0		0	0.000802104		0.0461657	0		0	0
'FE2t3pp'	0	0	0	0	0	0		0	0		1.00044e-11	5.6817		24.2887	16.0197
'FE2tex'	0.00668783	0.000886094	0.000886094	5.34395e-11	0.000756514	0.000759351		0.00110049	0.000802104		1.00044e-11	-5.6817		-24.2887	-16.0197
'FE2tpp'	0.00668783	0.000886094	0.000886094	5.34693e-11	0.000756514	0.000759351		0.00110049	0		-1.50067e-11	0		0	0
'FE3DCITabcpp'	0	5.00222e-12	0	5.00222e-12	5.00222e-12	0		5.00222e-12	0		1.00044e-11	0		5.00222e-12	0
'FE3DCITtonex'	0	0	0	0	0	0		0	0		-1.00044e-11	0		0	0
'FE3DHBZR'	0	5.00222e-12	0	5.00222e-12	5.00222e-12	0		5.00222e-12	0		0	0		5.00222e-12	0
'FE3DHBZSabcpp'	0	5.00222e-12	0	5.00222e-12	5.00222e-12	0		5.00222e-12	0		0	0		5.00222e-12	0
'FE3DHBZStonex'	0	0	0	0	0	0		0	0		0	0		0	0
'FE3HOXR1'	0	0	0	0	0	0		0	0		0	0		0	0
'FE3HOXR2'	0	0	0	0	0	0		0	0		1.00044e-11	0		0	0
'FE3HOXR3'	0	0	0	0	0	0		0	0		7.00311e-11	0		0	0
'FE3HOXUtex'	0	0	0	0	0	0		0	0		3.00133e-11	0		0	0
'FE3HOXUtpp'	0	0	0	0	0	0		0	0		3.00133e-11	0		0	0
'FE3HOXabcpp'	0	0	0	0	0	0		0	0		0	0		0	0
'FE3HOXexs'	0	0	0	0	0	0		0	0		0.00504677	0		0	0
'FE3HOXtonex'	0	0	0	0	0	0		0	0		-1.20053e-10	0		0	0
'FE3Ri'	0	-6.33703e-13	0	-6.33703e-13	0	0		0	0		0	2.84126		12.1448	8.01039
'FE3abcpp'	0.00629287	0.000833763	0.000833763	4.03071e-11	0.000711836	0.000714505		0.0010355	0.000754734		0	5.68329		24.2905	16.0218
'FE3tex'	0.00629287	0.000833763	0.000833763	4.02673e-11	0.000711836	0.000714505		0.0010355	0.000754734		0	5.68329		24.2905	16.0218
'FECRMR1'	0	0	0	0	0	0		0	0		0	0		0	0
'FECRMR2'	0	0	0	0	0	0		0	0		0	0		0	0
'FECRMR3'	0	0	0	0	0	0		0	0		0	0		0	0
'FECRMUtex'	0	0	0	0	0	0		0	0		3.00133e-11	0		0	0
'FECRMUtpp'	0	0	0	0	0	0		0	0		0	0		0	0
'FECRMabcpp'	0	0	0	0	0	0		0	0		0	0		0	0
'FECRMexs'	0	0	0	0	0	0		0	0		0	0		0	0
'FECRMtonex'	0	0	0	0	0	0		0	0		5.00222e-12	0		0	0
'FEENTERR1'	0	8.33703e-13	0	8.33703e-13	0	0		0	0		5.00222e-12	0		0	0
'FEENTERR2'	0	0	0	0	0	0		0	0		0	0		0	0
'FEENTERR3'	0	0	0	0	0	0		0	0		4.00178e-11	0		0	0
'FEENTERabcpp'	0	0	0	0	0	0		0	0		3.00133e-11	0		0	0
'FEENTERexs'	0	0	0	0	0	0		0	0		0	0		0	0
'FEENTERtex'	0	1.66741e-12	0	1.66741e-12	0	0		1.66741e-12	0		1.00044e-11	0		0	0
'FEENTERtonex'	0	0	0	0	0	0		0	0		1.00044e-11	0		0	0
'FEENTERtpp'	0	1.66741e-12	0	1.66741e-12	0	0		1.66741e-12	0		999.912	0		0	0
'FEOXAMR1'	0	0	0	0	0	0		0	0		1.00044e-11	0		0	0
'FEOXAMR2'	0	0	0	0	0	0		0	0		-1.00044e-11	0		0	0
'FEOXAMR3'	0	0	0	0	0	0		0	0		0.215448	0		0	0
'FEOXAMUtex'	0	0	0	0	0	0		0	0		3.00133e-11	0		0	0
'FEOXAMUtpp'	0	0	0	0	0	0		0	0		3.00133e-11	0		0	0
'FEOXAMabcpp'	0	0	0	0	0	0		0	0		0	0		0	0
'FEOXAMexs'	0	0	0	0	0	0		0	0		0	0		0	0
'FEOXAMtonex'	0	0	0	0	0	0		0	0		0.313066	0		0	0
'FEROpp'	0	0	0	0	0	0		0	0		1000	0		0	0
'FFSD'	0	1.00044e-11	0	1.00044e-11	1.00044e-11	0		1.00044e-11	0		2.50111e-11	0		1.00044e-11	0
'FHL'	0	0	0	0	0	0		0	0		-1.50067e-11	0		0	0
'FLDR'	0	0.00941122	0.00624091	0.00317032	0.00532825	0.00534823		0.00393742	14.8508		-3.00133e-11	0.00283311		0.00675636	0.0073553
'FLVR'	0	0	0	0	0	0		0	0		2.50111e-11	0		0	0
'FLVRx'	0	0	0	0	0	0		0	0		-1.50067e-11	0		0	0
'FMETTRS'	0	0	0	0	0	0		0	0		0	0		0	0
'FMNAT'	0.000197482	2.61651e-05	2.61651e-05	1.57887e-12	2.23388e-05	2.24226e-05		3.24961e-05	2.3685e-05		0	2.41415e-05		2.83262e-05	3.08372e-05
'FMNRx'	0	5.00222e-11	0	5.00222e-11	5.00222e-11	0		5.00222e-11	0		4.00178e-11	0		5.00222e-11	0
'FMNRx2'	0	0	0	0	0	0		0	0		-3.00133e-11	0		0	0
'FORt2pp'	0	0	0	0	0	0		0	0		0.0383762	0		0	0
'FORtex'	-0.00217231	-15.3291	-15.3291	-1.09401e-06	1.00044e-11	0		-8.57851	0		0.0383762	-18.8398		-32.0872	-29.6667
'FORtppi'	0.00217231	15.3291	15.3291	1.09401e-06	-1.00044e-11	0		8.57851	0		0.0376886	18.8398		32.0872	29.6667
'FRD2'	0.294955	26.4586	1.70084	24.7578	0.0331365	0.0332608		0.0482035	16.7364		0.0753775	0		0	0
'FRD3'	0	1.50067e-11	0	1.50067e-11	1.50067e-11	0		1.50067e-11	7.1055e-05		0.113426	0		1.50067e-11	0
'FRUK'	0	1.00044e-11	0	1.00044e-11	1.00044e-11	0		1.00044e-11	0		5.00222e-12	0		1.00044e-11	0
'FRULYSDG'	0	2.00089e-11	0	2.00089e-11	2.00089e-11	0		2.00089e-11	0		0	0		2.00089e-11	0
'FRULYSE'	0	1.00044e-11	0	1.00044e-11	1.00044e-11	0		1.00044e-11	0		1.00044e-11	0		1.00044e-11	0
'FRULYSK'	0	2.00089e-11	0	2.00089e-11	2.00089e-11	0		2.00089e-11	0		-5.00832e-26	0		2.00089e-11	0
'FRULYSt2pp'	0	1.00044e-11	0	1.00044e-11	1.00044e-11	0		1.00044e-11	0		5.00222e-12	0		1.00044e-11	0
'FRULYStex'	0	-5.00832e-26	0	-5.00832e-26	-5.00832e-26	0		-5.00832e-26	0		0	0		-5.00832e-26	0
'FRUURt2rpp'	0	-1.50067e-10	0	-1.50067e-10	-1.50067e-10	0		-1.50067e-10	0		1.00044e-11	0		-1.50067e-10	0
'FRUURtex'	0	-1.70076e-10	0	-1.70076e-10	-1.70076e-10	0		-1.70076e-10	0		-5.00832e-26	0		-1.70076e-10	0
'FRUpts2pp'	0	1.00044e-11	0	1.00044e-11	1.00044e-11	0		1.00044e-11	0		1.00044e-11	0		1.00044e-11	0
'FRUptspp'	0	1.00044e-11	0	1.00044e-11	1.00044e-11	0		1.00044e-11	0		3.00133e-11	0		1.00044e-11	0
'FRUtex'	0	-5.00832e-26	0	-5.00832e-26	-5.00832e-26	0		-5.00832e-26	0		0	0		-5.00832e-26	0
'FTHFD'	0	0	0	0	0	0		0	0		-1.00044e-11	0		25.939	21.4785
'FUCtex'	0	-2.00089e-11	0	-2.00089e-11	-2.00089e-11	0		-2.00089e-11	0		-2.00089e-11	0		-2.00089e-11	0
'FUCtpp'	0	5.16988e-26	0	5.16988e-26	5.16988e-26	0		5.16988e-26	0		0	0		5.16988e-26	0
'FUM'	4.31172	-1.57908	-1.57908	5.87238e-07	0.0708208	0.0710947		0.165589	0.110535		1.20053e-10	18.4813		0.611127	0.553292
'FUMt2_2pp'	0	0	0	0	0	0		0	0		0	0		4.00178e-11	0
'FUMt2_3pp'	0	0	0	0	0	0		0	0		0	0		0	0
'FUMtex'	0	1.00044e-11	0	1.00044e-11	1.00044e-11	0		1.00044e-11	0		0.0461657	0		1.00044e-11	0
'G1PACT'	0.0836511	0.0110832	0.0110832	6.48782e-10	0.00946244	0.00949792		0.0137649	0.0100327		0.0383762	0.0102261		0.0119986	0.0130623
'G1PPpp'	0	2.50111e-11	0	2.50111e-11	2.50111e-11	0		2.50111e-11	0		0	0		2.50111e-11	0
'G1PTT'	0	0	0	0	0	0		2.00089e-11	0		0	0		0	0
'G1Ptex'	0	-1.50067e-11	0	-1.50067e-11	-1.50067e-11	0		-1.50067e-11	0		0	0		-1.50067e-11	0
'G1SAT'	0.00315972	0.000418642	0.000418642	2.52284e-11	0.000357421	0.000358761		0.000519937	0.00037896		18.4071	0.000386265		0.000453219	0.000493396
'G2PPpp'	0	1.00044e-11	0	1.00044e-11	1.00044e-11	0		1.00044e-11	0		18.4071	0		1.00044e-11	0
'G3PAT120'	-8.83847e-28	0	0	0	0	0		0	0		-0.0383762	0		0	0
'G3PAT140'	-1.78386e-30	0	0	0	0	0		0	0		0	0		0	0
'G3PAT141'	7.94537e-34	0	0	0	0	0		0	0		0	0		0	0
'G3PAT160'	0.0565083	0.00748697	0.00748697	4.51784e-10	0.0063921	0.00641607		0.00929854	0.00677731		0	0.00690794		0.00810535	0.00882388
'G3PAT161'	0.0666038	0.00882456	0.00882456	5.32498e-10	0.00753408	0.00756234		0.0109598	0.00798811		0	0.00814208		0.00955341	0.0104003
'G3PAT180'	0	0	0	0	0	0		0	0		-0.000614565	0		0	0
'G3PAT181'	0	0	0	0	0	0		0	0		0.000614565	0		0	0
'G3PCabcpp'	0	5.00222e-12	0	5.00222e-12	5.00222e-12	0		5.00222e-12	0		1.00044e-11	0		5.00222e-12	0
'G3PCtex'	0	-5.00832e-26	0	-5.00832e-26	-5.00832e-26	0		-5.00832e-26	0		0	0		-5.00832e-26	0
'G3PD2'	-0.123112	-0.0163115	-0.0163115	-8.34164e-10	-0.0139262	-0.0139784		-0.0202583	-14.4295		8.67941e-05	-0.01505		-0.0176588	-0.0192242
'G3PD5'	0	0	0	0	0	0		0	0		8.67941e-05	0		0	0
'G3PD6'	0	0	0	0	0	0		0	14.4147		0	0		0	0
'G3PD7'	0	0	0	0	0	0		0	0		3.00133e-11	0		0	0
'G3PEabcpp'	0	2.00089e-11	0	2.00089e-11	0	0		0	0		3.00133e-11	0		0	0
'G3PEtex'	0	1.00044e-11	0	1.00044e-11	1.00044e-11	0		1.00044e-11	0		0.29378	0		1.00044e-11	0
'G3PGabcpp'	-5.68894e-30	0	0	0	0	0		0	0		-1000	0		0	0
'G3PGtex'	0	1.00044e-11	0	1.00044e-11	1.00044e-11	0		1.00044e-11	0		0	0		1.00044e-11	0
'G3PIabcpp'	0	1.00044e-11	0	1.00044e-11	1.00044e-11	0		1.00044e-11	0		-1.00044e-11	0		1.00044e-11	0
'G3PItex'	0	-5.00832e-26	0	-5.00832e-26	-5.00832e-26	0		-5.00832e-26	0		0	0		-5.00832e-26	0
'G3PSabcpp'	0	1.00044e-11	0	1.00044e-11	1.00044e-11	0		1.00044e-11	0		0	0		1.00044e-11	0
'G3PStex'	0	-5.00832e-26	0	-5.00832e-26	-5.00832e-26	0		-5.00832e-26	0		0	0		-5.00832e-26	0
'G3PT'	-5.68894e-30	0	0	0	-8.00355e-11	0		0	0		0	0		-8.00355e-11	0
'G5SADs'	0.1958	0.0259422	0.0259422	1.54541e-09	0.0221485	0.0222315		0.0322192	0.0234832		1.20053e-10	0.0239358		0.0280848	0.0305745
'G5SD'	0.1958	0.0259422	0.0259422	1.54541e-09	0.0221485	0.0222315		0.0322192	0.0234832		8.50378e-11	0.0239358		0.0280848	0.0305745
'G6PDA'	0	0	0	0	0	0		0	0		5.00222e-12	0		0	0
'G6PDH2r'	4.76689	-1.00044e-11	0	-1.00044e-11	1.6476	1.65378		-1.00044e-11	0		0	0		-8.00355e-11	0
'G6PP'	0	0	0	0	0	0		0	0		5.00222e-12	0		0	0
'G6Pt6_2pp'	0	1.00044e-11	0	1.00044e-11	1.00044e-11	0		1.00044e-11	0		0	0		1.00044e-11	0
'G6Ptex'	0	-5.00832e-26	0	-5.00832e-26	-5.00832e-26	0		-5.00832e-26	0		0	0		-5.00832e-26	0
'GAL1PPpp'	0	2.50111e-11	0	2.50111e-11	2.50111e-11	0		2.50111e-11	0		5.78629e-05	0		2.50111e-11	0
'GAL1Ptex'	0	-1.50067e-11	0	-1.50067e-11	-1.50067e-11	0		-1.50067e-11	0		0.0319545	0		-1.50067e-11	0
'GALBDtex'	0	-5.00832e-26	0	-5.00832e-26	-5.00832e-26	0		-5.00832e-26	0		0.0386889	0		-5.00832e-26	0
'GALCTD'	0	1.00044e-11	0	1.00044e-11	1.00044e-11	0		1.00044e-11	0		0.0579542	0		1.00044e-11	0
'GALCTLO'	0	1.00044e-11	0	1.00044e-11	1.00044e-11	0		1.00044e-11	0		0.0386889	0		1.00044e-11	0
'GALCTND'	0	1.00044e-11	0	1.00044e-11	1.00044e-11	0		1.00044e-11	0		6.50289e-11	0		1.00044e-11	0
'GALCTNLt2pp'	0	1.00044e-11	0	1.00044e-11	1.00044e-11	0		1.00044e-11	0		0	0		1.00044e-11	0
'GALCTNLtex'	0	-5.00832e-26	0	-5.00832e-26	-5.00832e-26	0		-5.00832e-26	0		0	0		-5.00832e-26	0
'GALCTNt2pp'	0	1.00044e-11	0	1.00044e-11	1.00044e-11	0		1.00044e-11	0		0	0		1.00044e-11	0
'GALCTNtex'	0	-5.00832e-26	0	-5.00832e-26	-5.00832e-26	0		-5.00832e-26	0		0	0		-5.00832e-26	0
'GALCTt2rpp'	0	1.00044e-11	0	1.00044e-11	1.00044e-11	0		1.00044e-11	0		0	0		1.00044e-11	0
'GALCTtex'	0	-1.00044e-11	0	-1.00044e-11	-1.00044e-11	0		-1.00044e-11	0		-1.00044e-11	0		-1.00044e-11	0
'GALKr'	0	8.75389e-11	0	8.75389e-11	8.75389e-11	0		8.75389e-11	0		0	0		8.75389e-11	0
'GALM2pp'	0	1.00044e-11	0	1.00044e-11	1.00044e-11	0		1.00044e-11	0		0	0		1.00044e-11	0
'GALS3'	0	5.00222e-12	0	5.00222e-12	5.00222e-12	0		5.00222e-12	0		0	0		5.00222e-12	0
'GALT1'	0	0	0	0	0	0		2.00089e-11	0		0	0		0	0
'GALTptspp'	0	1.00044e-11	0	1.00044e-11	1.00044e-11	0		1.00044e-11	0		0	0		1.00044e-11	0
'GALTtex'	0	-5.00832e-26	0	-5.00832e-26	-5.00832e-26	0		-5.00832e-26	0		8.00355e-11	0		-5.00832e-26	0
'GALURt2rpp'	0	-9.004e-11	0	-9.004e-11	-9.004e-11	0		-9.004e-11	0		1.00044e-11	0		-9.004e-11	0
'GALURtex'	0	-1.10049e-10	0	-1.10049e-10	-1.10049e-10	0		-1.10049e-10	0		0	0		-1.10049e-10	0
'GALUi'	0	-1.00044e-11	0	-1.00044e-11	-1.00044e-11	0		7.00311e-11	0		1.00044e-11	0		-1.00044e-11	0
'GALabcpp'	0	2.75122e-11	0	2.75122e-11	2.75122e-11	0		2.75122e-11	0		0	0		2.75122e-11	0
'GALt2pp'	0	2.75122e-11	0	2.75122e-11	2.75122e-11	0		2.75122e-11	0		0	0		2.75122e-11	0
'GALtex'	0	6.50289e-11	0	6.50289e-11	6.50289e-11	0		6.50289e-11	0		-5.97721e-11	0		6.50289e-11	0
'GAM6Pt6_2pp'	0	1.00044e-11	0	1.00044e-11	1.00044e-11	0		1.00044e-11	0		0.00827852	0		1.00044e-11	0
'GAMAN6Ptex'	0	-5.00832e-26	0	-5.00832e-26	-5.00832e-26	0		-5.00832e-26	0		0.00975753	0		-5.00832e-26	0
'GAMptspp'	0	1.00044e-11	0	1.00044e-11	1.00044e-11	0		1.00044e-11	0		0	0		1.00044e-11	0
'GAMtex'	0	-5.00832e-26	0	-5.00832e-26	-5.00832e-26	0		-5.00832e-26	0		0	0		-5.00832e-26	0
'GAPD'	16.2929	19.7194	19.7194	-1.21764e-08	18.1127	18.3191		9.77769	9.85298		-0.0383762	9.83485		19.6962	19.6692
'GARFT'	0.395787	0.0524391	0.0524391	2.66375e-09	-0.0263371	-0.133141		0.0651274	-0.140637		0	0.0483545		0.0567702	0.0618028
'GART'	0	0	0	0	0.0711076	0.178079		0	0.188105		5.78627e-05	2.90221e-05		0	0
'GBBTNtex'	0	0	0	0	0	0		0	0		0.0702455	0		0	0
'GCALDD'	0.000592447	7.84953e-05	7.84953e-05	1.47411e-11	6.70164e-05	6.72677e-05		9.74882e-05	7.1055e-05		0.0579542	7.24246e-05		8.49785e-05	9.25117e-05
'GDMANE'	0	0	0	0	0	0		0	0		-0.0579542	0		0	0
'GDPDPK'	0	0	0	0	0	0		0	0		0	0		0	0
'GDPMNH'	0	0	0	0	0	0		0	0		3.00133e-11	0		0	0
'GDPMNP'	0	0	0	0	0	0		0	0		3.00133e-11	0		0	0
'GDPtex'	0	-1.00044e-11	0	-1.00044e-11	-1.00044e-11	0		-1.00044e-11	0		0	0		-1.00044e-11	0
'GF6PTA'	0.0836511	0.0110832	0.0110832	5.63744e-10	0.00946243	0.00949792		0.0137649	0.0100327		1.00044e-11	0.0102261		0.0119986	0.0130623
'GGGABADr'	0	0	0	0	0	0		0	0		0.0036041	0		0	0
'GGGABAH'	0	0	0	0	0	0		0	0		1.00044e-11	0		0	0
'GGPTRCO'	0	0	0	0	0	0		0	0		0	0		0	0
'GGPTRCS'	0	0	0	0	0	0		0	0		0.00540614	0		0	0
'GHMT2r'	0.987174	0.130794	0.130794	6.98773e-09	0.0460893	-0.0604426		0.162441	-0.0638456		0	0.120664		13.1111	10.8934
'GK1'	0.215402	0.0285393	0.0285393	1.7222e-09	0.0243658	0.0244572		14.8461	14.8653		-0.0756273	0.0263321		0.0308965	0.0336354
'GLBRAN2'	0	0	1000	-1000	0	0		0	1000		0	1000		0	1000
'GLCATr'	0	0	0	0	0	0		0	0		0	0		0	0
'GLCDpp'	0	-8.00355e-11	0	-8.00355e-11	-8.00355e-11	0		0	0		1.00044e-11	9.90621		0	0
'GLCNt2rpp'	0	-7.00311e-11	0	-7.00311e-11	-7.00311e-11	0		1.00044e-11	0		1.00044e-11	9.90621		1.00044e-11	0
'GLCNtex'	0	1.00044e-11	0	1.00044e-11	1.00044e-11	0		1.00044e-11	0		1.00044e-11	0		1.00044e-11	0
'GLCP'	0	0	0	0	0	0		0	0		-5.00832e-26	0		0	0
'GLCP2'	0	0	0	0	0	0		0	0		5.00222e-11	0		0	999.569
'GLCRAL'	0	2.00089e-11	0	2.00089e-11	2.00089e-11	0		2.00089e-11	0		5.00222e-11	0		2.00089e-11	0
'GLCRD'	0	1.00044e-11	0	1.00044e-11	1.00044e-11	0		1.00044e-11	0		0	0		1.00044e-11	0
'GLCRt2rpp'	0	1.00044e-11	0	1.00044e-11	1.00044e-11	0		1.00044e-11	0		0	0		1.00044e-11	0
'GLCRtex'	0	-1.00044e-11	0	-1.00044e-11	-1.00044e-11	0		-1.00044e-11	0		0	0		-1.00044e-11	0
'GLCS1'	0	0	0	0	0	0		0	0		1.00044e-11	0		0	999.569
'GLCTR1'	0	0	0	0	0	0		2.00089e-11	0		1.00044e-11	0		0	0
'GLCTR2'	0	0	0	0	0	0		2.00089e-11	0		1.00044e-11	0		0	0
'GLCTR3'	0	0	0	0	0	0		2.00089e-11	0		1.00044e-11	0		0	0
'GLCUR1Ptex'	0	-1.50067e-11	0	-1.50067e-11	-1.50067e-11	0		-1.50067e-11	0		3.00133e-11	0		-1.50067e-11	0
'GLCURt2rpp'	0	-9.004e-11	0	-9.004e-11	-9.004e-11	0		-9.004e-11	0		3.00133e-11	0		-9.004e-11	0
'GLCURtex'	0	-1.70076e-10	0	-1.70076e-10	-1.70076e-10	0		-1.70076e-10	0		3.00133e-11	0		-1.70076e-10	0
'GLCabcpp'	0	0	0	0	0	0		0	0		3.00133e-11	0		-5.50244e-11	0
'GLCptspp'	10	10	10	5.49996e-11	10	10		8.99215	0		1.00044e-11	0		0	0
'GLCt2pp'	0	2.50111e-11	0	2.50111e-11	0	0		1.00785	10		1.00044e-11	0.093787		10	10
'GLCtex'	-990	-30	10	-40	-30	10		-30	10		-5.00832e-26	10		-30	10
'GLCtexi'	1000	40	0	40	40	0		40	0		0	0		40	0
'GLDBRAN2'	0	0	1000	-1000	0	0		0	1000		0	1000		0	0.431054
'GLGC'	0	0	0	0	0	0		0	0		0	0		0	999.569
'GLNS'	1.60069	0.21208	0.21208	1.13412e-08	0.267986	0.181745		0.263396	1.09313		0	0.195679		0.229597	0.24995
'GLNTRS'	0	0	0	0	0	0		0	0		0	0		0	0
'GLNabcpp'	0	1.00044e-11	0	1.00044e-11	1.00044e-11	0		1.00044e-11	0		0	0		1.00044e-11	0
'GLNtex'	0	-5.00832e-26	0	-5.00832e-26	-5.00832e-26	0		-5.00832e-26	0		0	0		-5.00832e-26	0
'GLTPD'	0	1.00044e-11	0	1.00044e-11	1.00044e-11	0		1.00044e-11	0		0	0		1.00044e-11	0
'GLU5K'	0.1958	0.0259422	0.0259422	1.54541e-09	0.0221485	0.0222315		0.0322192	0.0234832		5.00222e-12	0.0239358		0.0280848	0.0305745
'GLUABUTt7pp'	1.11371e-13	1000	0	1000	-1.00044e-11	0		-1.00044e-11	0		3.50155e-11	0		999.999	0
'GLUCYS'	0	0	0	0	0	0		0	0		3.50155e-11	0		0	0
'GLUDC'	0	0	0	0	0	0		0	0		3.50155e-11	0		0	0
'GLUDy'	-7.56253	-1.00199	-1.00199	-5.72262e-08	-0.849928	-0.853124		-1.24443	0		2.00089e-11	-13.4148		-20.563	-20.6129
'GLUN'	0	0	0	0	0	0		0	0		1.00044e-11	0		0	0
'GLUNpp'	0	1.00044e-11	0	1.00044e-11	1.00044e-11	0		1.00044e-11	0		0	0		1.00044e-11	0
'GLUPRT'	0.395787	0.0524391	0.0524391	2.66376e-09	0.0447705	0.0449384		0.0651274	0.0474686		0	0.0483835		0.0567702	0.0618028
'GLUR'	-0.0246012	-0.00325949	-0.00325949	-1.76689e-10	-0.00278283	-0.00279327		-0.00404816	-0.00295054		2.89314e-05	-0.00300741		-0.0035287	-0.00384152
'GLUSy'	0	0	0	0	0	0		0	0.901148		0	0		0	0
'GLUTRR'	0.00315972	0.000418642	0.000418642	2.5262e-11	0.000357421	0.000358761		0.000519937	0.00037896		5.00222e-11	0.000386265		0.000453219	0.000493396
'GLUTRS'	0.00315972	0.000418642	0.000418642	2.5262e-11	0.000357421	0.000358761		0.000519937	0.00037896		1.00044e-11	0.000386265		0.000453219	0.000493396
'GLUabcpp'	0	0	0	0	1.13352	0		0	0		-5.00832e-26	0		0	0
'GLUt2rpp'	-1000	-1000	0	-1000	-1.13352	0		7.00311e-11	0		1.00044e-11	0		-1000	-1000
'GLUt4pp'	1000	1.60071e-10	0	1.60071e-10	0	0		0	0		0	0		0.000601709	1000
'GLUtex'	0	1.00044e-11	0	1.00044e-11	1.00044e-11	0		1.00044e-11	0		0.00737426	0		1.00044e-11	0
'GLXCL'	0	-6.00267e-11	0	-6.00267e-11	2.00089e-11	0		-6.00267e-11	5.57966e-06		0.00737426	0		-6.00267e-11	0
'GLYALDtex'	0	5.00222e-11	0	5.00222e-11	5.00222e-11	0		5.00222e-11	0		0	0		5.00222e-11	0
'GLYALDtpp'	0	5.00222e-11	0	5.00222e-11	5.00222e-11	0		5.00222e-11	0		0	0		5.00222e-11	0
'GLYAT'	1.9773e-24	-1.00044e-11	0	-1.00044e-11	-0.0600478	-0.166978		-1.00044e-11	0		0	0		4.6374	0
'GLYBabcpp'	0	0	0	0	0	0		0	0		0	0		0	0
'GLYBt2pp'	0	0	0	0	0	0		0	0		5.78627e-05	0		0	0
'GLYBtex'	0	-5.00832e-26	0	-5.00832e-26	-5.00832e-26	0		-5.00832e-26	0		5.00222e-12	0		-5.00832e-26	0
'GLYC2Ptex'	0	-5.00832e-26	0	-5.00832e-26	-5.00832e-26	0		-5.00832e-26	0		0	0		-5.00832e-26	0
'GLYC3Pabcpp'	0	0	0	0	0	0		0	0		0	0		0	0
'GLYC3Pt6pp'	-8.79949e-28	4.00178e-11	0	4.00178e-11	4.00178e-11	0		6.00267e-11	0		0	0		0	0
'GLYC3Ptex'	0	1.00044e-11	0	1.00044e-11	1.00044e-11	0		1.00044e-11	0		0	0		1.00044e-11	0
'GLYCAt2rpp'	0	3.00133e-11	0	3.00133e-11	3.00133e-11	0		3.00133e-11	0		0	0		3.00133e-11	0
'GLYCAtex'	0	3.00133e-11	0	3.00133e-11	3.00133e-11	0		3.00133e-11	0		0	0		3.00133e-11	0
'GLYCDx'	0	0	0	0	0	0		0	0		0	0		0	0
'GLYCK'	2.88785e-28	0	0	0	8.00355e-11	0		0	0		0	0		0	0
'GLYCK2'	0	0	0	0	0	0		0	5.57966e-06		0	0		0	0
'GLYCL'	0.0488862	0.0064771	0.00647709	1.66737e-10	0	0		0.00804431	0		5.00222e-12	0.00596166		12.9765	10.7469
'GLYCLTDx'	0	0	0	0	0	0		0	0		0	18.3686		0	0
'GLYCLTDy'	0	0	0	0	0	0		0	0		5.00222e-12	0		0	0
'GLYCLTt2rpp'	0	1.00044e-11	0	1.00044e-11	-6.70164e-05	-6.72677e-05		-9.72584e-05	0		-1.00044e-11	-18.3687		-8.26089e-05	-9.25117e-05
'GLYCLTt4pp'	0	0	0	0	0	0		0	0		0	0		0	0
'GLYCLTtex'	0	1.00044e-11	0	1.00044e-11	-6.70164e-05	-6.72677e-05		-9.72584e-05	0		0	-18.3687		-8.26089e-05	-9.25117e-05
'GLYCTO2'	0.000592447	0	0	0	0	0		2.29769e-07	0		2.00089e-11	0		2.36954e-06	0
'GLYCTO3'	0	7.84953e-05	7.84953e-05	2.47455e-11	0	0		0	0		0.0383762	0		0	0
'GLYCTO4'	0	0	0	0	0	0		0	7.1055e-05		0.0383762	0		0	0
'GLYCtex'	0	1.00044e-11	0	1.00044e-11	1.00044e-11	0		1.00044e-11	0		0	0		1.00044e-11	0
'GLYCtpp'	-5.68894e-30	-2.00089e-11	0	-2.00089e-11	-3.00133e-11	0		-3.00133e-11	0		0	0		-3.00133e-11	0
'GLYK'	0	7.00311e-11	0	7.00311e-11	0	0		8.00355e-11	0		0	0		0	0
'GLYOX'	0	1.00044e-11	0	1.00044e-11	0	0		0	0		1.00044e-11	0		0	0
'GLYOX3'	0	0	0	0	0	0		0	0		-0.35415	0		0	0
'GLYTRS'	0	0	0	0	0	0		0	0		1.00044e-11	0		0	0
'GLYt2pp'	0	1.00044e-11	0	1.00044e-11	1.00044e-11	0		1.00044e-11	0		1.00044e-11	0		1.00044e-11	0
'GLYt4pp'	0	1.00044e-11	0	1.00044e-11	1.00044e-11	0		1.00044e-11	0		-5.00832e-26	0		1.00044e-11	0
'GLYtex'	0	-5.00832e-26	0	-5.00832e-26	-5.00832e-26	0		-5.00832e-26	0		0	0		-5.00832e-26	0
'GMAND'	0	0	0	0	0	0		0	0		-1.00044e-11	0		0	0
'GMHEPAT'	0	0	0	0	0	0		8.00355e-11	0		0	0		0	0
'GMHEPK'	0	0	0	0	0	0		8.00355e-11	0		0.0312796	0		0	0
'GMHEPPA'	0	0	0	0	0	0		8.00355e-11	0		0	0		0	0
'GMPR'	0	0	0	0	0	0		0	0		0	0		0	0
'GMPS2'	0.215402	0.0285393	0.0285393	1.57713e-09	0.0243658	0.0244572		0.0354448	0.0258342		2.00089e-11	0.0263321		0.0308965	0.0336354
'GMPtex'	0	-5.00832e-26	0	-5.00832e-26	-5.00832e-26	0		-5.00832e-26	0		1.00044e-11	0		-5.00832e-26	0
'GND'	4.76689	-1.00044e-11	0	-1.00044e-11	0	0.320114		0	0		0	0		0	0
'GNK'	0	0	0	0	0	0		8.00355e-11	0		0	9.90621		8.00355e-11	0
'GOFUCR'	0	0	0	0	0	0		0	0		7.47286e-05	0		0	0
'GP4GH'	0	0	0	0	0	0		0	0		0.0429157	0		0	0
'GPDDA1'	0	0	0	0	0	0		0	0		0.35415	0		0	0
'GPDDA1pp'	0	1.00044e-11	0	1.00044e-11	1.00044e-11	0		1.00044e-11	0		0	0		1.00044e-11	0
'GPDDA2'	0	0	0	0	0	0		0	0		0.000295541	0		0	0
'GPDDA2pp'	0	-1.00044e-11	0	-1.00044e-11	-1.00044e-11	0		-1.00044e-11	0		0	0		1.00044e-11	0
'GPDDA3'	0	1.00044e-11	0	1.00044e-11	1.00044e-11	0		1.00044e-11	0		0	0		1.00044e-11	0
'GPDDA3pp'	0	1.00044e-11	0	1.00044e-11	1.00044e-11	0		1.00044e-11	0		0	0		1.00044e-11	0
'GPDDA4'	0	0	0	0	0	0		0	0		-0.595015	0		0	0
'GPDDA4pp'	5.68894e-30	0	0	0	1.00044e-11	0		0	0		0	0		1.00044e-11	0
'GPDDA5'	0	0	0	0	0	0		0	0		0	0		0	0
'GPDDA5pp'	0	1.00044e-11	0	1.00044e-11	1.00044e-11	0		1.00044e-11	0		0	0		1.00044e-11	0
'GRTT'	0.000246189	3.26183e-05	3.26184e-05	-6.69544e-11	2.78483e-05	2.79528e-05		4.05107e-05	2.95266e-05		0	3.00957e-05		3.53124e-05	3.84428e-05
'GRXR'	0	0.0319698	0.0351401	-0.00317032	0.0300013	0.00263138		14.8543	0		0	0.00868337		0.0380424	0.0414148
'GSNK'	0	0	0	0	0	0		0	0		1.00044e-11	0		0	0
'GSNt2pp'	0	1.10049e-10	0	1.10049e-10	0	0		0	0		0	0		0	0
'GSNtex'	0	-1.00044e-10	0	-1.00044e-10	-1.00044e-10	0		-1.00044e-10	0		0	0		-1.00044e-10	0
'GSPMDA'	0	0	0	0	0	0		0	0		1.00044e-11	0		0	0
'GSPMDS'	0	0	0	0	0	0		0	0		0	0		0	0
'GTHOXtex'	0	-1.00044e-11	0	-1.00044e-11	-1.00044e-11	0		-1.00044e-11	0		8.39	0		-1.00044e-11	0
'GTHOr'	0	0.0319698	0.0351401	-0.00317032	0.0300013	0.00263138		14.8543	0		0.0122913	0.00868337		0.0380424	0.0414148
'GTHRDHpp'	0	1.40062e-10	0	1.40062e-10	4.00178e-11	0		4.00178e-11	0		0	0		4.00178e-11	0
'GTHRDabc2pp'	0	1.30058e-10	0	1.30058e-10	3.00133e-11	0		3.00133e-11	0		1.00044e-11	0		3.00133e-11	0
'GTHRDabcpp'	0	0	0	0	0	0		0	0		-5.00832e-26	0		0	0
'GTHRDtex'	0	1.00044e-11	0	1.00044e-11	1.00044e-11	0		1.00044e-11	0		0	0		1.00044e-11	0
'GTHS'	0	0	0	0	0	0		0	0		0	0		0	0
'GTPCI'	0.000592447	7.84953e-05	7.84953e-05	4.73662e-12	6.70164e-05	6.72677e-05		9.74882e-05	7.1055e-05		0.0319545	7.24246e-05		8.49785e-05	9.25117e-05
'GTPCII2'	0.000394965	5.23302e-05	5.23302e-05	3.15775e-12	4.46776e-05	4.48451e-05		6.49921e-05	4.737e-05		0	4.82831e-05		5.66523e-05	6.16745e-05
'GTPDPDP'	0	0	0	0	0	0		0	0		0	0		0	0
'GTPDPK'	0	0	0	0	0	0		0	0		0	0		0	0
'GTPHs'	0	0	0	0	0	0		0	0		3.00133e-11	0		0	0
'GTPtex'	0	-5.00832e-26	0	-5.00832e-26	-5.00832e-26	0		-5.00832e-26	0		1.00044e-11	0		-5.00832e-26	0
'GUAD'	0	0	0	0	0	0		0	0		-5.00832e-26	0		0	0
'GUAPRT'	0	1.45064e-10	0	1.45064e-10	3.50155e-11	0		14.8106	14.8395		-1.74483e-25	0		-5.45093e-11	0
'GUAt2pp'	0	0	0	0	0	0		0	0		-1.74483e-25	0		0	0
'GUAtex'	0	1.00044e-11	0	1.00044e-11	1.00044e-11	0		1.00044e-11	0		0	0		1.00044e-11	0
'GUAtpp'	0	1.00044e-11	0	1.00044e-11	1.00044e-11	0		1.00044e-11	0		0.000614565	0		1.00044e-11	0
'GUI1'	0	3.20142e-10	0	3.20142e-10	3.20142e-10	0		3.20142e-10	0		0	0		3.20142e-10	0
'GUI2'	0	-9.004e-11	0	-9.004e-11	-9.004e-11	0		-9.004e-11	0		0	0		-9.004e-11	0
'GUR1PPpp'	0	2.50111e-11	0	2.50111e-11	2.50111e-11	0		2.50111e-11	0		-0.000614565	0		2.50111e-11	0
'H2O2tex'	0	-3.00133e-11	0	-3.00133e-11	-3.00133e-11	0		-3.00133e-11	0		5.00222e-12	0		-3.00133e-11	0
'H2Otex'	-43.7089	-13.0572	-13.0572	1.68122e-07	-2.86841	-2.87916		-3.83847	-11.392		0	0		0	0
'H2Otpp'	-43.7089	-13.0572	-13.0572	1.69502e-07	-2.86841	-2.87916		-3.83847	-11.392		5.00222e-12	-9.90621		-5.30235e-10	0
'H2SO'	0	0	0	0	0	0		0	0		1.00044e-11	0		0	0
'H2St1pp'	0	0	0	0	0	0		0	0		1.50067e-11	0		0	0
'H2Stex'	0	0	0	0	0	0		0	0		-5.00832e-26	0		0	0
'H2tex'	0	-2.50111e-11	0	-2.50111e-11	-2.50111e-11	0		-2.50111e-11	0		0.081292	0		-2.50111e-11	0
'H2tpp'	0	2.50111e-11	0	2.50111e-11	2.50111e-11	0		2.50111e-11	0		0	0		2.50111e-11	0
'HACD1i'	8.87858e-28	3.00133e-11	0	3.00133e-11	3.00133e-11	0		3.00133e-11	0		0	0		3.00133e-11	0
'HACD2i'	8.87865e-28	0	0	0	0	0		0	0		0	0		0	0
'HACD3i'	0	-1.00044e-11	0	-1.00044e-11	-1.00044e-11	0		-1.00044e-11	0		0	0		-1.00044e-11	0
'HACD4i'	1.731e-30	-2.00089e-11	0	-2.00089e-11	-2.00089e-11	0		-2.00089e-11	0		0	0		-2.00089e-11	0
'HACD5i'	-1.76764e-27	0	0	0	0	0		0	0		0	0		0	0
'HACD6i'	-3.57078e-30	0	0	0	0	0		0	0		0	0		0	0
'HACD7i'	0	0	0	0	0	0		0	0		0	0		0	0
'HACD8i'	0	0	0	0	0	0		0	0		0	0		0	0
'HBZOPT'	0.000197482	2.61651e-05	2.61651e-05	2.68732e-12	2.23388e-05	2.24226e-05		3.24961e-05	2.3685e-05		0	2.41415e-05		2.83262e-05	3.08372e-05
'HCINNMt2rpp'	0	1.00044e-11	0	1.00044e-11	1.00044e-11	0		1.00044e-11	0		0	0		1.00044e-11	0
'HCINNMtex'	0	-1.00044e-11	0	-1.00044e-11	-1.00044e-11	0		-1.00044e-11	0		0	0		-1.00044e-11	0
'HCO3E'	2.53254	0.335545	0.335545	1.96471e-08	0.349244	0.28755		0.416734	0.30374		0.000309941	0.309595		0.363259	0.395461
'HCYSMT'	0	0	0	0	0	0		0	0		0	0		0	0
'HCYSMT2'	0	1.00044e-11	0	1.00044e-11	1.00044e-11	0		1.00044e-11	0		0	0		1.00044e-11	0
'HDCAtexi'	0	0	0	0	0	0		0	0		0	0		0	0
'HDCEAtexi'	0	0	0	0	0	0		0	0		0	0		0	0
'HDCOAI'	0	0	0	0	0	0		0	0		5.00222e-11	0		0	0
'HEMEOS'	0	0	0	0	0	0		0	0		1.00044e-11	0		0	0
'HEPK1'	0	0	0	0	0	0		2.00089e-11	0		0	0		0	0
'HEPK2'	0	0	0	0	0	0		2.00089e-11	0		0	0		0	0
'HEPT1'	0	0	0	0	0	0		2.00089e-11	0		-1.00044e-11	0		0	0
'HEPT2'	0	0	0	0	0	0		2.00089e-11	0		0.0407404	0		0	0
'HEPT3'	0	0	0	0	0	0		2.00089e-11	0		0.0482304	0		0	0
'HEPT4'	0	0	0	0	0	0		2.00089e-11	0		2.89314e-05	0		0	0
'HETZK'	0	0	0	0	0	0		0	0		0	0		0	0
'HEX1'	0	0	0	0	0	0		1.00785	0		0	0.093787		0	10
'HEX4'	0	0	0	0	0	0		0	0		1.00044e-11	0		0	0
'HEX7'	0	1.77579e-10	0	1.77579e-10	1.52568e-10	0		0	10		-5.00832e-26	0		10	0
'HEXt2rpp'	8.87879e-28	1.00044e-11	0	1.00044e-11	1.00044e-11	0		1.00044e-11	0		0	0		1.00044e-11	0
'HG2abcpp'	0	0	0	0	0	0		0	0		0	0		0	0
'HG2t3pp'	0	0	0	0	0	0		0	0		0	0		0	0
'HG2tex'	0	-1.00044e-11	0	-1.00044e-11	-1.00044e-11	0		-1.00044e-11	0		0	0		-1.00044e-11	0
'HISTD'	0.083899	0.0111161	0.0111161	6.60769e-10	0.00949048	0.00952607		0.0138057	0.0100624		0	0.0102564		0.0120342	0.013101
'HISTP'	0.083899	0.0111161	0.0111161	6.60769e-10	0.00949048	0.00952607		0.0138057	0.0100624		0	0.0102564		0.0120342	0.013101
'HISTRS'	0	0	0	0	0	0		0	0		0	0		0	0
'HISabcpp'	0	0	0	0	0	0		0	0		0	0		0	0
'HISt2rpp'	-8.68171e-30	1.00044e-11	0	1.00044e-11	1.00044e-11	0		1.00044e-11	0		0	0		1.00044e-11	0
'HIStex'	0	1.00044e-11	0	1.00044e-11	1.00044e-11	0		1.00044e-11	0		0	0		1.00044e-11	0
'HKNDDH'	0	2.00089e-11	0	2.00089e-11	2.00089e-11	0		2.00089e-11	0		0	0		2.00089e-11	0
'HKNTDH'	0	1.00044e-11	0	1.00044e-11	1.00044e-11	0		1.00044e-11	0		0	0		1.00044e-11	0
'HMBS'	0.000394965	5.23302e-05	5.23302e-05	3.15775e-12	4.46776e-05	4.48451e-05		6.49921e-05	4.737e-05		0	4.82831e-05		5.66523e-05	6.16745e-05
'HMPK1'	0	0	0	0	0	0		0	0		0	0		0	0
'HOMt2pp'	0	0	0	0	0	0		0	0		0	0		0	0
'HOMtex'	0	0	0	0	0	0		0	0		0.000307282	0		0	0
'HOPNTAL'	0	3.00133e-11	0	3.00133e-11	3.00133e-11	0		3.00133e-11	0		0.000614565	0		3.00133e-11	0
'HPPK2'	0.000592447	7.84953e-05	7.84953e-05	4.73662e-12	6.70164e-05	6.72677e-05		9.74882e-05	7.1055e-05		0	7.24246e-05		8.49785e-05	9.25117e-05
'HPPPNDO'	0	2.00089e-11	0	2.00089e-11	2.00089e-11	0		2.00089e-11	0		-5.00832e-26	0		2.00089e-11	0
'HPPPNt2rpp'	0	1.00044e-11	0	1.00044e-11	1.00044e-11	0		1.00044e-11	0		-1.13211	0		1.00044e-11	0
'HPPPNtex'	0	-1.00044e-11	0	-1.00044e-11	-1.00044e-11	0		-1.00044e-11	0		-1.13211	0		-1.00044e-11	0
'HPYRI'	0	0	-1000	1000	0	-1000		0	-1000		0	0		0	-1000
'HPYRRx'	0	0	1000	-1000	0	1000		0	1000		0	0		0	1000
'HPYRRy'	0	0	0	0	0	0		0	0		0.00040971	0		0	0
'HSDy'	-0.618238	-0.0819124	-0.0819124	-4.86274e-09	-0.129982	-0.237174		-0.101732	-0.250527		0.00040971	-0.0755774		-0.0886778	-0.096539
'HSK'	0.481928	0.0638522	0.0638522	3.82301e-09	0.114562	0.221697		0.0793021	0.234179		2.00089e-11	0.058914		0.069126	0.0752539
'HSST'	0.13631	0.0180601	0.0180601	1.03978e-09	0.0154191	0.0154769		0.02243	0.0163483		0	0.0166634		0.0195518	0.021285
'HSTPT'	0.083899	0.0111161	0.0111161	6.60769e-10	0.00949048	0.00952607		0.0138057	0.0100624		0	0.0102564		0.0120342	0.013101
'HXAND'	0	0	0	0	0	0		-7.00311e-11	0		0	0		0	0
'HXAtex'	8.87879e-28	1.00044e-11	0	1.00044e-11	1.00044e-11	0		1.00044e-11	0		0	0		1.00044e-11	0
'HXCT'	8.87873e-28	0	0	0	0	0		0	0		0	0		0	0
'HXPRT'	0	1.15051e-10	0	1.15051e-10	1.15051e-10	0		0	0		0	0		0	0
'HYD1pp'	0	3.50155e-11	0	3.50155e-11	3.50155e-11	0		3.50155e-11	0		0	0		3.50155e-11	0
'HYD2pp'	0	3.50155e-11	0	3.50155e-11	3.50155e-11	0		3.50155e-11	0		0	0		3.50155e-11	0
'HYD3pp'	0	3.50155e-11	0	3.50155e-11	3.50155e-11	0		3.50155e-11	0		0	0		3.50155e-11	0
'HYPOE'	0	0	0	0	0	0		0	0		2.89314e-05	0		0	0
'HYXNtex'	0	3.00133e-11	0	3.00133e-11	3.00133e-11	0		3.00133e-11	0		0	0		3.00133e-11	0
'HYXNtpp'	0	3.00133e-11	0	3.00133e-11	3.00133e-11	0		3.00133e-11	0		0	0		3.00133e-11	0
'Htex'	-9.81144	-36.3398	-36.3398	-4.73354e-07	-19.5095	-19.5076		-32.644	-24.5037		5.00222e-12	-43.8853		-57.5435	-46.9576
'ICDHyr'	4.34236	1.8385	1.8385	-5.72693e-07	0.107719	0.108123		0.156698	0.11421		0	0.116412		0.13659	0.148699
'ICHORS'	-1000	-121.154	-1000	878.846	-27.7351	-1000		-998.922	-1000		5.00222e-12	-1000		-998.922	-1000
'ICHORSi'	1000	121.154	1000	-878.846	27.7351	1000		998.922	1000		0	1000		998.922	1000
'ICHORT'	0	0	0	0	0	0		0	0		0	0		0	0
'ICL'	0	6.55301	6.55301	8.21902e-07	0	0		0.0139334	0		0	18.3686		0.478933	0.409379
'IDOND'	0	-4.00178e-11	0	-4.00178e-11	-4.00178e-11	0		-4.00178e-11	0		0	0		-4.00178e-11	0
'IDOND2'	0	0	0	0	0	0		0	0		0	0		0	0
'IDONt2rpp'	0	3.00133e-11	0	3.00133e-11	3.00133e-11	0		3.00133e-11	0		5.00222e-12	0		3.00133e-11	0
'IDONtex'	0	3.00133e-11	0	3.00133e-11	3.00133e-11	0		3.00133e-11	0		0	0		3.00133e-11	0
'IG3PS'	0.083899	0.0111161	0.0111161	6.60769e-10	0.00949048	0.00952607		0.0138057	0.0100624		0	0.0102564		0.0120342	0.013101
'IGPDH'	0.083899	0.0111161	0.0111161	6.60769e-10	0.00949048	0.00952607		0.0138057	0.0100624		5.00222e-12	0.0102564		0.0120342	0.013101
'IGPS'	0.0503359	0.00666917	0.00666917	3.62418e-10	0.00569389	0.00571524		0.00828285	0.00603702		18.4071	0.00615338		0.00721999	0.00786004
'ILETA'	-0.257258	-0.034085	-0.034085	-2.04683e-09	-0.0291005	-0.0292097		-0.0423323	-0.0308542		1.00044e-11	-0.0314489		-0.0369002	-0.0401714
'ILETRS'	0	0	0	0	0	0		0	0		1.00044e-11	0		0	0
'ILEabcpp'	0	0	0	0	0	0		0	0		-5.00832e-26	0		0	0
'ILEt2rpp'	0	1.00044e-11	0	1.00044e-11	1.00044e-11	0		1.00044e-11	0		5.00222e-12	0		1.00044e-11	0
'ILEtex'	0	1.00044e-11	0	1.00044e-11	1.00044e-11	0		1.00044e-11	0		0	0		1.00044e-11	0
'IMPC'	-0.479488	-0.063529	-0.063529	-3.33292e-09	-0.0542387	-0.0544421		-0.0789006	-0.0575073		0	-0.0586158		-0.068776	-0.074873
'IMPD'	0.215402	0.0285393	0.0285393	1.50709e-09	0.0243658	0.0244572		0.0354448	0.0258342		0.0208254	0.0263321		0.0308965	0.0336354
'IMPtex'	0	-5.00832e-26	0	-5.00832e-26	-5.00832e-26	0		-5.00832e-26	0		5.00222e-12	0		-5.00832e-26	0
'INDOLEt2pp'	0	114.533	0	114.533	27.9291	0		998.922	0		0	0		998.922	0
'INDOLEt2rpp'	7.60863e-28	114.533	0	114.533	27.9291	0		998.922	0		0	0		998.922	0
'INDOLEtex'	0	1.00044e-11	0	1.00044e-11	1.00044e-11	0		1.00044e-11	0		0.00040971	0		1.00044e-11	0
'INOSTt4pp'	0	0	0	0	0	0		0	0		0.00040971	0		0	0
'INSH'	0	0	0	0	0	0		0	0		0	0		0	0
'INSK'	0	0	0	0	0	0		1.85082e-10	0		-1.00166e-25	0		1.15051e-10	0
'INSTtex'	0	-1.50067e-11	0	-1.50067e-11	-1.50067e-11	0		-1.50067e-11	0		0	0		-1.50067e-11	0
'INSt2pp'	1000	0	1000	-1000	0	0		0	0		1.00044e-11	1000		0	1000
'INSt2rpp'	-1000	6.00267e-11	-1000	1000	6.00267e-11	0		6.00267e-11	0		-5.00832e-26	-1000		6.00267e-11	-1000
'INStex'	0	5.00222e-11	0	5.00222e-11	5.00222e-11	0		5.00222e-11	0		1.00044e-11	0		5.00222e-11	0
'IPDDI'	-0.00186944	3.26183e-05	3.26184e-05	-6.69048e-11	2.78483e-05	2.79528e-05		4.05107e-05	2.95266e-05		1.00044e-11	3.00957e-05		3.53124e-05	3.84428e-05
'IPDPS'	0	0.000280306	0.000280307	-7.4456e-10	0.000239315	0.000240213		0.00034813	0.000253738		-5.00832e-26	0.000258628		0.000303458	0.00033036
'IPMD'	0.39895	0.0528582	0.0528582	3.1796e-09	0.0451284	0.0452976		0.0656479	0.047848		1.00044e-11	0.0487702		0.0572239	0.0622968
'IPPMIa'	-0.39895	-0.0528582	-0.0528582	-3.1796e-09	-0.0451284	-0.0452976		-0.0656479	-0.047848		0	-0.0487702		-0.0572239	-0.0622968
'IPPMIb'	-0.39895	-0.0528582	-0.0528582	-3.1796e-09	-0.0451284	-0.0452976		-0.0656479	-0.047848		1.00044e-11	-0.0487702		-0.0572239	-0.0622968
'IPPS'	0.39895	0.0528582	0.0528582	3.1796e-09	0.0451284	0.0452976		0.0656479	0.047848		-5.00832e-26	0.0487702		0.0572239	0.0622968
'ISETACabcpp'	0	1.00044e-11	0	1.00044e-11	1.00044e-11	0		1.00044e-11	0		0.0319545	0		1.00044e-11	0
'ISETACtex'	0	-5.00832e-26	0	-5.00832e-26	-5.00832e-26	0		-5.00832e-26	0		0	0		-5.00832e-26	0
'K2L4Aabcpp'	0.0172244	0.00228211	0.00228211	1.37709e-10	0.00194838	0.00195569		0.0028343	0.0020658		0.0199695	0.00210562		0.0024706	0.00268962
'K2L4Atex'	0.0172244	0.00228211	0.00228211	1.37709e-10	0.00194838	0.00195569		0.0028343	0.0020658		0	0.00210562		0.0024706	0.00268962
'KARA1'	-0.774234	-0.102581	-0.102581	-6.17004e-09	-0.0875797	-0.0879081		-0.127401	-0.0928576		0	-0.0946474		-0.111053	-0.120898
'KARA2'	0.257258	0.034085	0.034085	2.04683e-09	0.0291005	0.0292097		0.0423323	0.0308542		1.00044e-11	0.0314489		0.0369002	0.0401714
'KAS14'	0.315122	0	0	0	0	0		0	0		1.00044e-11	0		0.0451999	0
'KAS15'	0	0.0417515	0.0417515	2.48939e-09	0.0356459	0.0357796		0.0518538	0.0377941		0	0.0385225		0	0.0492068
'KAT1'	0	0	0	0	128.858	0		999.912	0		0	0		999.876	0
'KAT2'	8.87869e-28	0	0	0	0	0		0	0		0	0		0	0
'KAT3'	0	-1.00044e-11	0	-1.00044e-11	-1.00044e-11	0		-1.00044e-11	0		36.9999	0		-1.00044e-11	0
'KAT4'	0	-2.00089e-11	0	-2.00089e-11	-2.00089e-11	0		-2.00089e-11	0		0	0		-2.00089e-11	0
'KAT5'	0	0	0	0	0	0		0	0		0	0		0	0
'KAT6'	0	0	0	0	0	0		0	0		0	0		0	0
'KAT7'	0	0	0	0	0	0		0	0		0	0		0	0
'KAT8'	0	0	0	0	0	0		0	0		1.20053e-10	0		0	0
'KDOCT2'	0.0344487	0.00456423	0.00456423	2.75418e-10	0.00389677	0.00391138		0.0056686	0.0041316		8.50378e-11	0.00421124		0.0049412	0.00537923
'KDOPP'	0.0344487	0.00456423	0.00456423	2.75418e-10	0.00389677	0.00391138		0.0056686	0.0041316		0.0234675	0.00421124		0.0049412	0.00537923
'KDOPS'	0.0344487	0.00456423	0.00456423	2.75418e-10	0.00389677	0.00391138		0.0056686	0.0041316		2.50111e-11	0.00421124		0.0049412	0.00537923
'KG6PDC'	0	1.00044e-11	0	1.00044e-11	1.00044e-11	0		1.00044e-11	0		0	0		1.00044e-11	0
'Kabcpp'	0	0	0	0	0	0		0	0		0	0		0	0
'Kt2pp'	0.157277	0.0208382	0.0208382	1.25743e-09	0.0177909	0.0178576		0.0258803	0.018863		0	0.0192266		0.0225593	0.0245592
'Kt3pp'	0	0	0	0	0	0		0	0		2.50111e-11	0		0	0
'Ktex'	0.157277	0.0208382	0.0208382	1.25743e-09	0.0177909	0.0178576		0.0258803	0.018863		-1.50067e-11	0.0192266		0.0225593	0.0245592
'LA4NTpp'	0	0	0	0	0	0		0	0		0	0		0	0
'LACZ'	0	2.75122e-11	0	2.75122e-11	2.75122e-11	0		2.75122e-11	0		0	0		2.75122e-11	0
'LACZpp'	0	-4.502e-11	0	-4.502e-11	-4.502e-11	0		-4.502e-11	0		0	0		-4.502e-11	0
'LADGMDH'	0	0	0	0	0	0		0	0		0	0		0	0
'LALDO2x'	0	-1.00044e-11	0	-1.00044e-11	-1.00044e-11	0		-1.00044e-11	0		0	0		-1.00044e-11	0
'LALGP'	0	0	0	0	0	0		0	0		0	0		0	0
'LCADi'	0	4.502e-11	0	4.502e-11	4.502e-11	0		4.502e-11	0		0	0		4.502e-11	0
'LCARR'	0	-1.00044e-11	0	-1.00044e-11	-1.00044e-11	0		-1.00044e-11	0		0.00180205	0		-1.00044e-11	0
'LCARS'	0	-5.00222e-12	0	-5.00222e-12	-5.00222e-12	0		-5.00222e-12	0		1.00044e-11	0		-5.00222e-12	0
'LCTSt3ipp'	0	-3.75167e-11	0	-3.75167e-11	-3.75167e-11	0		-3.75167e-11	0		-5.00832e-26	0		-3.75167e-11	0
'LCTStex'	0	-1.75078e-11	0	-1.75078e-11	-1.75078e-11	0		-1.75078e-11	0		1.00044e-11	0		-1.75078e-11	0
'LCTStpp'	0	-1.00044e-11	0	-1.00044e-11	-1.00044e-11	0		-1.00044e-11	0		0.0445258	0		-1.00044e-11	0
'LDH_D'	-2.66015e-28	4.502e-11	0	4.502e-11	-18.5225	-18.517		2.50111e-11	0		0.0481299	0		3.50155e-11	0
'LDH_D2'	0	0	0	0	0	0		0	0		1.00044e-11	0		0	0
'LEUTAi'	0.39895	0.0528582	0.0528582	3.1796e-09	0.0451284	0.0452976		0.0656479	0.047848		0	0.0487702		0.0572239	0.0622968
'LEUTRS'	0	0	0	0	0	0		0	0		0	0		0	0
'LEUabcpp'	0	0	0	0	0	0		0	0		0	0		0	0
'LEUt2rpp'	0	1.00044e-11	0	1.00044e-11	1.00044e-11	0		1.00044e-11	0		0	0		1.00044e-11	0
'LEUtex'	0	1.00044e-11	0	1.00044e-11	1.00044e-11	0		1.00044e-11	0		0.00827852	0		1.00044e-11	0
'LGTHL'	0	1.00044e-11	0	1.00044e-11	0	0		0	0		0.00975753	0		0	0
'LIPACabcpp'	0	0	0	0	0	0		0	0		0	0		0	0
'LIPAHT2ex'	0	0	0	0	0	0		0	0		0	0		0	0
'LIPAHTex'	0	0	0	0	0	0		0	0		0	0		0	0
'LIPAabcpp'	-6.70504e-30	0	0	0	0	0		0	0		0.000115725	0		0	0
'LIPAtex'	-6.70504e-30	0	0	0	0	0		0	0		0	0		0	0
'LPADSS'	0.0172244	0.00228211	0.00228211	1.37709e-10	0.00194838	0.00195569		0.0028343	0.0020658		-5.00832e-26	0.00210562		0.0024706	0.00268962
'LPLIPAL1A120pp'	-8.83841e-28	-2.00089e-11	0	-2.00089e-11	0	0		3.00133e-11	0		-5.00832e-26	0		0	0
'LPLIPAL1A140pp'	-1.78584e-30	0	0	0	0	0		0	0		0	0		0	0
'LPLIPAL1A141pp'	7.94537e-34	0	0	0	0	0		0	0		0	0		-6.00267e-11	0
'LPLIPAL1A160pp'	0	0	0	0	0	0		0	0		2.50111e-11	0		0	0
'LPLIPAL1A161pp'	0	3.00133e-11	0	3.00133e-11	0	0		0	0		-1.50067e-11	0		0	0
'LPLIPAL1A180pp'	0	0	0	0	0	0		0	0		0	0		0	0
'LPLIPAL1A181pp'	0	0	0	0	0	0		0	0		1.00044e-11	0		0	0
'LPLIPAL1E120pp'	0	0	0	0	0	0		-2.00089e-11	0		-3.30147e-10	0		0	0
'LPLIPAL1E140pp'	0	0	0	0	0	0		0	0		-3.50155e-10	0		0	0
'LPLIPAL1E141pp'	0	0	0	0	0	0		0	0		0	0		0	0
'LPLIPAL1E160pp'	0	0	0	0	0	0		0	0		0.0482304	0		0	0
'LPLIPAL1E161pp'	0	0	0	0	-1.99847e-11	0		0	0		1.00044e-11	0		0	0
'LPLIPAL1E180pp'	0	0	0	0	0	0		0	0		0	0		0	0
'LPLIPAL1E181pp'	0	0	0	0	0	0		0	0		-5.00832e-26	0		0	0
'LPLIPAL1G120pp'	0	2.00089e-11	0	2.00089e-11	0	0		-1.00044e-11	0		2.50111e-11	0		0	0
'LPLIPAL1G140pp'	0	0	0	0	0	0		0	0		-1.50067e-11	0		0	0
'LPLIPAL1G141pp'	0	0	0	0	0	0		0	0		0.113426	0		0	0
'LPLIPAL1G160pp'	0	0	0	0	0	0		0	0		0.0376886	0		0	0
'LPLIPAL1G161pp'	0	-3.00133e-11	0	-3.00133e-11	0	0		0	0		8.98507	0		0	0
'LPLIPAL1G180pp'	0	0	0	0	0	0		0	0		3.00133e-11	0		0	0
'LPLIPAL1G181pp'	0	0	0	0	0	0		0	0		3.00133e-11	0		0	0
'LPLIPAL2A120'	0	2.00089e-11	0	2.00089e-11	0	0		0	0		0	0		0	0
'LPLIPAL2A140'	0	0	0	0	0	0		0	0		0	0		0	0
'LPLIPAL2A141'	0	0	0	0	0	0		0	0		0	0		6.00267e-11	0
'LPLIPAL2A160'	0	0	0	0	0	0		0	0		0	0		0	0
'LPLIPAL2A161'	0	0	0	0	0	0		0	0		1.00044e-11	0		0	0
'LPLIPAL2A180'	0	0	0	0	0	0		0	0		0.0481299	0		0	0
'LPLIPAL2A181'	0	0	0	0	0	0		0	0		0.0481299	0		0	0
'LPLIPAL2ATE120'	0	0	0	0	0	0		0	0		0.00348201	0		0	0
'LPLIPAL2ATE140'	0	0	0	0	0	0		0	0		8.67941e-05	0		0	0
'LPLIPAL2ATE141'	0	0	0	0	0	0		0	0		0	0		0	0
'LPLIPAL2ATE160'	0	0	0	0	0	0		0	0		8.67941e-05	0		0	0
'LPLIPAL2ATE161'	0	0	0	0	0	0		0	0		0.0429157	0		0	0
'LPLIPAL2ATE180'	0	0	0	0	0	0		0	0		0	0		0	0
'LPLIPAL2ATE181'	0	0	0	0	0	0		0	0		-0.0429157	0		0	0
'LPLIPAL2ATG120'	0	0	0	0	0	0		0	0		1.00044e-11	0		0	0
'LPLIPAL2ATG140'	0	0	0	0	0	0		0	0		5.78627e-05	0		0	0
'LPLIPAL2ATG141'	0	0	0	0	0	0		0	0		8.67941e-05	0		0	0
'LPLIPAL2ATG160'	0	0	0	0	0	0		0	0		5.78627e-05	0		0	0
'LPLIPAL2ATG161'	0	0	0	0	0	0		0	0		0	0		0	0
'LPLIPAL2ATG180'	0	0	0	0	0	0		0	0		0.0482304	0		0	0
'LPLIPAL2ATG181'	0	0	0	0	0	0		0	0		0.0482304	0		0	0
'LPLIPAL2E120'	0	-2.00089e-11	0	-2.00089e-11	0	0		0	0		-5.00832e-26	0		0	0
'LPLIPAL2E140'	0	0	0	0	0	0		0	0		2.50111e-11	0		0	0
'LPLIPAL2E141'	0	0	0	0	0	0		0	0		-1.50067e-11	0		0	0
'LPLIPAL2E160'	-7.77517e-27	0	0	0	0	0		0	0		0	0		0	0
'LPLIPAL2E161'	7.77517e-27	0	0	0	0	0		0	0		0	0		0	0
'LPLIPAL2E180'	0	0	0	0	0	0		0	0		0	0		0	0
'LPLIPAL2E181'	0	0	0	0	0	0		0	0		2.50416e-26	0		0	0
'LPLIPAL2G120'	0	0	0	0	0	0		0	0		2.50416e-26	0		0	0
'LPLIPAL2G140'	0	0	0	0	0	0		0	0		3.60668e-05	0		0	0
'LPLIPAL2G141'	1.653e-49	0	0	0	0	0		0	0		0	0		0	0
'LPLIPAL2G160'	7.77556e-27	0	0	0	0	0		0	0		0	0		0	0
'LPLIPAL2G161'	-4.78731e-28	0	0	0	0	0		0	0		0	0		0	0
'LPLIPAL2G180'	0	0	0	0	0	0		0	0		1.00044e-11	0		0	0
'LPLIPAL2G181'	0	0	0	0	0	0		0	0		0	0		0	0
'LSERDHr'	0	-1.00044e-11	0	-1.00044e-11	-1.00044e-11	0		-1.00044e-11	0		1.00044e-11	0		-1.00044e-11	0
'LYSDC'	0	0	0	0	0	0		0	0		-5.00832e-26	0		0	0
'LYSTRS'	0	0	0	0	0	0		0	0		-2.00089e-11	0		0	0
'LYSabcpp'	0	0	0	0	0	0		0	0		2.89314e-05	0		0	0
'LYSt2pp'	0	0	0	0	0	0		0	0		0	0		0	0
'LYSt3pp'	0	-1.00044e-11	0	-1.00044e-11	-1.00044e-11	0		-1.00044e-11	0		1.00044e-11	0		-1.00045e-11	0
'LYStex'	0	1.00044e-11	0	1.00044e-11	1.00044e-11	0		1.00044e-11	0		5.78627e-05	0		1.00044e-11	0
'LYXI'	0	1.00044e-11	0	1.00044e-11	1.00044e-11	0		1.00044e-11	0		0	0		1.00044e-11	0
'LYXt2pp'	0	1.00044e-11	0	1.00044e-11	1.00044e-11	0		1.00044e-11	0		8.67941e-05	0		1.00044e-11	0
'LYXtex'	0	-5.00832e-26	0	-5.00832e-26	-5.00832e-26	0		-5.00832e-26	0		8.67941e-05	0		-5.00832e-26	0
'L_LACD2'	0	1.40062e-10	0	1.40062e-10	0	0		0	0		0	0		0	0
'L_LACD3'	0	1.40062e-10	0	1.40062e-10	0	0		0	0		-5.00832e-26	0		0	0
'L_LACt2rpp'	0	-1.10049e-10	0	-1.10049e-10	-1.10049e-10	0		-1.10049e-10	0		7.47286e-05	0		-1.10049e-10	0
'L_LACtex'	0	-1.30058e-10	0	-1.30058e-10	-1.30058e-10	0		-1.30058e-10	0		7.47286e-05	0		-1.30058e-10	0
'M1PD'	0	1.00044e-11	0	1.00044e-11	1.00044e-11	0		1.00044e-11	0		9.004e-11	0		1.00044e-11	0
'MACPD'	0	0	0	0	0	0		0	0		0	0		0	0
'MALDDH'	0	1.00044e-11	0	1.00044e-11	1.00044e-11	0		1.00044e-11	0		0	0		1.00044e-11	0
'MALDt2_2pp'	0	1.00044e-11	0	1.00044e-11	1.00044e-11	0		1.00044e-11	0		0	0		1.00044e-11	0
'MALDtex'	0	-5.00832e-26	0	-5.00832e-26	-5.00832e-26	0		-5.00832e-26	0		0	0		-5.00832e-26	0
'MALS'	0.000592447	6.55309	6.55309	8.22056e-07	0	0		0.0139337	5.98957e-05		0	0		0.478935	0.409379
'MALTATr'	0	0	0	0	0	0		0	0		1.00044e-11	0		0	0
'MALTHXabcpp'	0	1.50067e-11	0	1.50067e-11	1.50067e-11	0		1.50067e-11	0		1.00044e-11	0		1.50067e-11	0
'MALTHXtexi'	0	0	0	0	0	0		0	0		-5.00832e-26	0		0	0
'MALTPTabcpp'	0	5.00222e-12	0	5.00222e-12	5.00222e-12	0		5.00222e-12	0		0.00339522	0		5.00222e-12	0
'MALTPTtexi'	0	0	0	0	0	0		0	0		-5.00832e-26	0		0	0
'MALTTRabcpp'	0	5.00222e-12	0	5.00222e-12	5.00222e-12	0		5.00222e-12	0		-5.00832e-26	0		5.00222e-12	0
'MALTTRtexi'	0	0	0	0	0	0		0	0		0	0		0	0
'MALTTTRabcpp'	0	5.00222e-12	0	5.00222e-12	5.00222e-12	0		5.00222e-12	0		2.50111e-11	0		5.00222e-12	0
'MALTTTRtexi'	0	0	0	0	0	0		0	0		2.50111e-11	0		0	0
'MALTabcpp'	0	5.00222e-12	0	5.00222e-12	5.00222e-12	0		5.00222e-12	0		-1.50067e-11	0		5.00222e-12	0
'MALTptspp'	0	0	0	0	0	0		0	0		0	0		0	0
'MALTtexi'	0	0	0	0	0	0		0	0		0.000309941	0		0	0
'MALt2_2pp'	0	1.00044e-11	0	1.00044e-11	1.00044e-11	0		1.00044e-11	0		0.000367804	0		1.00044e-11	0
'MALt2_3pp'	0	1.00044e-11	0	1.00044e-11	1.00044e-11	0		1.00044e-11	0		0	0		1.00044e-11	0
'MALtex'	0	-5.00832e-26	0	-5.00832e-26	-5.00832e-26	0		-5.00832e-26	0		3.00133e-11	0		-5.00832e-26	0
'MAN1PT2'	0	0	0	0	0	0		0	0		3.00133e-11	0		0	0
'MAN6PI'	0	3.00133e-11	0	3.00133e-11	3.00133e-11	0		3.00133e-11	0		2.89314e-05	0		3.00133e-11	0
'MAN6Pt6_2pp'	0	1.00044e-11	0	1.00044e-11	1.00044e-11	0		1.00044e-11	0		0.0266506	0		1.00044e-11	0
'MAN6Ptex'	0	-5.00832e-26	0	-5.00832e-26	-5.00832e-26	0		-5.00832e-26	0		0	0		-5.00832e-26	0
'MANAO'	0	-1.70076e-10	0	-1.70076e-10	-1.70076e-10	0		-1.70076e-10	0		0.0266506	0		-1.70076e-10	0
'MANGLYCptspp'	0	1.00044e-11	0	1.00044e-11	1.00044e-11	0		1.00044e-11	0		0	0		1.00044e-11	0
'MANGLYCtex'	0	-5.00832e-26	0	-5.00832e-26	-5.00832e-26	0		-5.00832e-26	0		0.0195151	0		-5.00832e-26	0
'MANPGH'	0	1.00044e-11	0	1.00044e-11	1.00044e-11	0		1.00044e-11	0		0	0		1.00044e-11	0
'MANptspp'	0	1.00044e-11	0	1.00044e-11	1.00044e-11	0		1.00044e-11	0		0.016557	0		1.00044e-11	0
'MANtex'	0	-5.00832e-26	0	-5.00832e-26	-5.00832e-26	0		-5.00832e-26	0		0	0		-5.00832e-26	0
'MCITD'	0	2.00089e-11	0	2.00089e-11	2.00089e-11	0		2.00089e-11	0		0.0195151	0		2.00089e-11	0
'MCITL2'	0	2.00089e-11	0	2.00089e-11	2.00089e-11	0		2.00089e-11	0		0	0		2.00089e-11	0
'MCITS'	0	2.00089e-11	0	2.00089e-11	2.00089e-11	0		2.00089e-11	0		0.016557	0		2.00089e-11	0
'MCOATA'	2.13695	0.283132	0.283132	1.69649e-08	0.241728	0.242634		0.351639	0.256295		0	0.261235		0.306517	0.333689
'MCPST'	0	0	0	0	0	0		0	0		0.0195151	0		0	0
'MCTP1App'	0.0123006	0.00162975	0.00162975	9.83432e-11	0.00139142	0.00139663		0.00202408	0.00147527		0	0.0015037		0.00176435	0.00192076
'MCTP1Bpp'	0	0	0	0	0	0		-1.00044e-11	0		0	0		0	0
'MCTP2App'	0	-3.33481e-12	0	-3.33481e-12	8.13912e-10	0		0	0		0	0		0	0
'MDDCP1pp'	0	0	0	0	0	0		0	0		0	0		-4.9546e-12	0
'MDDCP2pp'	0	-3.33481e-12	0	-3.33481e-12	8.13912e-10	0		0	0		0	0		0	0
'MDDCP3pp'	0	0	0	0	0	0		0	0		0.0461657	0		0	0
'MDDCP4pp'	0	0	0	0	0	0		0	0		0	0		0	0
'MDDCP5pp'	0	0	0	0	0	0		-1.00044e-11	0		0.0461657	0		0	0
'MDDEP1pp'	0	-3.33481e-12	0	-3.33481e-12	8.13912e-10	0		0	0		0	0		-4.9546e-12	0
'MDDEP2pp'	0	0	0	0	0	0		0	0		0.0461657	0		0	0
'MDDEP3pp'	0	0	0	0	0	0		0	0		0	0		0	0
'MDDEP4pp'	0	-3.33481e-12	0	-3.33481e-12	8.13912e-10	0		0	0		0	0		0	0
'MDH'	4.31231	4.97401	4.97401	1.40931e-06	0.0708208	0.0710947		0.179522	0.110595		0	18.4813		1.09006	0.962671
'MDH2'	0	0	0	0	0	0		0	0		0	0		0	0
'MDH3'	0	0	0	0	0	0		0	0		0	0		0	0
'MDRPD'	0	-1.00044e-11	0	-1.00044e-11	-1.00044e-11	0		-1.00044e-11	0		0	0		-1.00044e-11	0
'ME1'	0	0	0	0	0	0		0	0		0	0		0	0
'ME2'	0	0	0	0	0	0		0	0		-3.00133e-11	0		0	0
'MECDPDH2'	0.00211563	0.000280306	0.000280307	-7.4456e-10	0.000239315	0.000240213		0.00034813	0.000253738		0	0.000258628		0.000303458	0.00033036
'MECDPS'	0.00211563	0.000280306	0.000280307	-7.4456e-10	0.000239315	0.000240213		0.00034813	0.000253738		1.00044e-11	0.000258628		0.000303458	0.00033036
'MELIBt2pp'	0	5.00222e-12	0	5.00222e-12	5.00222e-12	0		5.00222e-12	0		2.00089e-11	0		5.00222e-12	0
'MELIBt3ipp'	0	0	0	0	0	0		0	0		0	0		0	0
'MELIBtex'	0	5.00222e-12	0	5.00222e-12	5.00222e-12	0		5.00222e-12	0		0	0		5.00222e-12	0
'MEPCT'	0.00211563	0.000280306	0.000280307	-7.4456e-10	0.000239315	0.000240213		0.00034813	0.000253738		0	0.000258628		0.000303458	0.00033036
'METAT'	0.000592447	7.84953e-05	7.84953e-05	-3.05093e-12	0.000111694	0.000112113		9.74882e-05	7.1055e-05		0	7.24246e-05		8.49785e-05	9.25117e-05
'METDabcpp'	0	0	0	0	0	0		0	0		7.00311e-11	0		0	0
'METDtex'	0	0	0	0	0	0		0	0		7.00311e-11	0		0	0
'METOX1s'	0	-1.00044e-11	0	-1.00044e-11	-1.00044e-11	0		1.00044e-11	0		2.00089e-11	0		-1.00044e-11	0
'METOX2s'	0	4.24393e-07	0	4.24393e-07	1.00044e-11	0		-1.00044e-11	0		2.00089e-11	0		-1.00044e-11	0
'METS'	0.136705	0.0181125	0.0181125	1.03515e-09	0.0154638	0.0155217		0.022495	0.0163957		0	0.0167117		0.0196084	0.0213467
'METSOX1abcpp'	0	1.00044e-11	0	1.00044e-11	1.00044e-11	0		1.00044e-11	0		0	0		1.00044e-11	0
'METSOX1tex'	0	-5.00832e-26	0	-5.00832e-26	-5.00832e-26	0		-5.00832e-26	0		0	0		-5.00832e-26	0
'METSOX2abcpp'	0	1.00044e-11	0	1.00044e-11	1.00044e-11	0		1.00044e-11	0		19.6897	0		1.00044e-11	0
'METSOX2tex'	0	-5.00832e-26	0	-5.00832e-26	-5.00832e-26	0		-5.00832e-26	0		0	0		-5.00832e-26	0
'METSOXR1'	0	0	0	0	0	0		2.00089e-11	0		-1.66133e-12	0		0	0
'METSOXR2'	0	4.24403e-07	0	4.24403e-07	2.00089e-11	0		0	0		0	0		0	0
'METTRS'	0	0	0	0	0	0		0	0		2.00089e-11	0		0	0
'METabcpp'	0	1.00044e-11	0	1.00044e-11	1.00044e-11	0		1.00044e-11	0		2.00089e-11	0		1.00044e-11	0
'METtex'	0	-5.00832e-26	0	-5.00832e-26	-5.00832e-26	0		-5.00832e-26	0		1.00044e-11	0		-5.00832e-26	0
'MG2t3_2pp'	0.00699158	0.000926339	0.000926339	5.58772e-11	0.000790873	0.000793839		0.00115048	0.000838534		1.00044e-11	0.000854697		0.00100285	0.00109175
'MG2tex'	0.00699158	0.000926339	0.000926339	5.58772e-11	0.000790873	0.000793839		0.00115048	0.000838534		-5.00832e-26	0.000854697		0.00100285	0.00109175
'MG2tpp'	0	0	0	0	0	0		0	0		5.00222e-11	0		0	0
'MG2uabcpp'	0	0	0	0	0	0		0	0		5.00222e-11	0		0	0
'MGSA'	0	0	0	0	-9.83373e-12	0		-1.00044e-11	0		-1.00044e-11	0		-1.00044e-11	0
'MI1PP'	0	0	0	0	0	0		0	0		-5.00222e-12	0		0	0
'MICITD'	0	2.00089e-11	0	2.00089e-11	2.00089e-11	0		2.00089e-11	0		0	0		2.00089e-11	0
'MINOHPtexi'	0	0	0	0	0	0		0	0		0	0		0	0
'MLDCP1App'	0	0	0	0	0	0		0	0		5.00832e-26	0		0	0
'MLDCP1Bpp'	0	0	0	0	0	0		0	0		5.00832e-26	0		0	0
'MLDCP2App'	0	0	0	0	0	0		0	0		5.00832e-26	0		0	0
'MLDCP2Bpp'	0	0	0	0	0	0		0	0		5.00832e-26	0		0	0
'MLDCP3App'	-1.33037e-28	0	0	0	0	0		0	0		5.00832e-26	0		0	0
'MLDEP1pp'	-1.33037e-28	0	0	0	0	0		0	0		5.00832e-26	0		0	0
'MLDEP2pp'	0	0	0	0	0	0		-1.00044e-11	0		3.50155e-10	0		0	0
'MLTG1'	0	3.50155e-11	0	3.50155e-11	3.50155e-11	0		3.50155e-11	0		1.00044e-11	0		3.50155e-11	0
'MLTG2'	0	3.50155e-11	0	3.50155e-11	3.50155e-11	0		3.50155e-11	0		1.50067e-11	0		3.50155e-11	0
'MLTG3'	0	0	0	0	0	0		0	0		1.50067e-11	0		0	0
'MLTG4'	0	0	0	0	0	0		0	0		1.50067e-11	0		0	0
'MLTG5'	0	0	0	0	0	0		0	0		1.00044e-11	0		0	0
'MLTGY1pp'	0	-2.88027e-12	0	-2.88027e-12	8.13912e-10	0		0	0		1.00044e-11	0		-4.54768e-12	0
'MLTGY2pp'	0	0	0	0	0	0		-1.00044e-11	0		1.50067e-11	0		0	0
'MLTGY3pp'	-1.33039e-28	0	0	0	0	0		0	0		-1.00044e-11	0		0	0
'MLTGY4pp'	0	-3.33481e-12	0	-3.33481e-12	8.13912e-10	0		0	0		1.00044e-11	0		0	0
'MLTP1'	0	6.00267e-11	0	6.00267e-11	6.00267e-11	0		6.00267e-11	0		-3.00133e-11	0		6.00267e-11	0
'MLTP2'	0	5.50244e-11	0	5.50244e-11	5.50244e-11	0		5.50244e-11	0		-1.00044e-11	0		5.50244e-11	0
'MLTP3'	0	3.50155e-11	0	3.50155e-11	3.50155e-11	0		3.50155e-11	0		-1.00044e-11	0		3.50155e-11	0
'MMCD'	-2.95194e-14	0	0	0	0	0		0	0		-1.00044e-11	0		0	0
'MME'	-2.95194e-14	0	0	0	0	0		0	0		1.00044e-11	0		0	0
'MMETt2pp'	0	1.00044e-11	0	1.00044e-11	1.00044e-11	0		1.00044e-11	0		-3.00133e-11	0		1.00044e-11	0
'MMETtex'	0	-5.00832e-26	0	-5.00832e-26	-5.00832e-26	0		-5.00832e-26	0		1.50067e-11	0		-5.00832e-26	0
'MMM2'	-2.95194e-14	0	0	0	0	0		0	0		3.00133e-11	0		0	0
'MN2t3pp'	0	0	0	0	0	0		0	0		1.50067e-11	0		0	0
'MN2tpp'	0.00279663	0.000370535	0.000370535	2.23591e-11	0.000316349	0.000317536		0.000460191	0.000335414		3.00133e-11	0.000341879		0.000401139	0.0004367
'MN6PP'	0	0	0	0	0	0		0	0		5.00832e-26	0		0	0
'MNLptspp'	0	1.00044e-11	0	1.00044e-11	1.00044e-11	0		1.00044e-11	0		0	0		1.00044e-11	0
'MNLtex'	0	-5.00832e-26	0	-5.00832e-26	-5.00832e-26	0		-5.00832e-26	0		5.00832e-26	0		-5.00832e-26	0
'MNNH'	0	1.8008e-10	0	1.8008e-10	0	0		0	0		0	0		0	0
'MNt2pp'	0	0	0	0	0	0		0	0		0	0		0	0
'MNtex'	0.00279663	0.000370535	0.000370535	2.23964e-11	0.000316349	0.000317536		0.000460191	0.000335414		-3.00133e-11	0.000341879		0.000401139	0.0004367
'MOAT'	0.0172244	0.00228211	0.00228211	1.37709e-10	0.00194838	0.00195569		0.0028343	0.0020658		-8.50378e-11	0.00210562		0.0024706	0.00268962
'MOAT2'	0.0172244	0.00228211	0.00228211	1.37709e-10	0.00194838	0.00195569		0.0028343	0.0020658		0	0.00210562		0.0024706	0.00268962
'MOAT3C'	0	0	0	0	0	0		2.00089e-11	0		0	0		0	0
'MOBDabcpp'	0.00279663	0.000370535	0.000370535	2.23591e-11	0.000316349	0.000317536		0.000460191	0.000335414		-1.00044e-11	0.000341879		0.000401139	0.0004367
'MOBDtex'	0.00279663	0.000370535	0.000370535	2.23964e-11	0.000316349	0.000317536		0.000460191	0.000335414		-3.00133e-11	0.000341879		0.000401139	0.0004367
'MOHMT'	0.000510089	6.75834e-05	6.75834e-05	4.1771e-12	5.77002e-05	5.79166e-05		8.3936e-05	6.11774e-05		5.00832e-26	6.23566e-05		7.31653e-05	7.96514e-05
'MPTG'	0.0123006	0.00162975	0.00162975	9.50084e-11	0.00139142	0.00139663		0.00202408	0.00147527		-1.00044e-11	0.0015037		0.00176435	0.00192076
'MPTG2'	0	-3.33481e-12	0	-3.33481e-12	8.13912e-10	0		0	0		5.00832e-26	0		0	0
'MSO3abcpp'	0	1.00044e-11	0	1.00044e-11	1.00044e-11	0		1.00044e-11	0		-1.00044e-11	0		1.00044e-11	0
'MSO3tex'	0	-5.00832e-26	0	-5.00832e-26	-5.00832e-26	0		-5.00832e-26	0		5.00832e-26	0		-5.00832e-26	0
'MTAN'	0	-1.00044e-11	0	-1.00044e-11	-1.00044e-11	0		-1.00044e-11	0		-3.00133e-11	0		-1.00044e-11	0
'MTHFC'	0.875472	0.115994	0.115994	5.99825e-09	0.027924	-0.078676		0.14406	-0.0831057		5.00832e-26	0.106994		26.0646	21.6152
'MTHFD'	0.875472	0.115994	0.115994	5.99825e-09	0.027924	-0.078676		0.14406	-0.0831057		-1.00044e-11	0.106994		26.0646	21.6152
'MTHFR2'	0.136705	0.0181125	0.0181125	1.03515e-09	0.0154638	0.0155217		0.022495	0.0163957		-5.00222e-12	0.0167117		0.0196084	0.0213467
'MTRI'	0	-1.00044e-11	0	-1.00044e-11	-1.00044e-11	0		-1.00044e-11	0		0	0		-1.00044e-11	0
'MTRK'	0	-1.00044e-11	0	-1.00044e-11	-1.00044e-11	0		-1.00044e-11	0		0	0		-1.00044e-11	0
'MTRPOX'	0	0	0	0	0	0		0	0		-1.00044e-11	0		0	0
'N2Otex'	0	-1.00044e-11	0	-1.00044e-11	-1.00044e-11	0		-1.00044e-11	0		5.00832e-26	0		-1.00044e-11	0
'N2Otpp'	0	-1.00044e-11	0	-1.00044e-11	-1.00044e-11	0		-1.00044e-11	0		-1.00044e-11	0		-1.00044e-11	0
'NACODA'	0	0	0	0	0	0		0	0		0	0		0	0
'NACtex'	0	-5.00832e-26	0	-5.00832e-26	-5.00832e-26	0		-5.00832e-26	0		-1.00044e-11	0		-5.00832e-26	0
'NACtpp'	0	1.00044e-11	0	1.00044e-11	1.00044e-11	0		1.00044e-11	0		1.74483e-25	0		1.00044e-11	0
'NADDP'	0	-1.00044e-11	0	-1.00044e-11	-1.00044e-11	0		-1.00044e-11	0		5.00832e-26	0		-1.00044e-11	0
'NADH10'	0	26.4585	0	26.4585	0	0		0	0		-0.000614565	0		0	0
'NADH16pp'	33.3132	0	24.7966	-24.7966	0	0		7.8962	0		0	5.57507		36.4786	29.3484
'NADH17pp'	0	0	1.66195	-1.66195	0	0		0	2.28652		-1.50067e-11	0		0	0
'NADH18pp'	0	0	0	0	0	0		0	0		0	0		0	0
'NADH5'	0	0	0	0	0	0		0	0		-1.00044e-11	0		0	0
'NADH9'	0	0	0	0	0	0		0	0		1.00044e-11	0		0	0
'NADK'	0.00039585	5.24475e-05	5.24475e-05	3.16486e-12	4.47778e-05	4.49457e-05		6.51379e-05	4.74762e-05		5.00832e-26	4.83913e-05		5.67793e-05	6.18128e-05
'NADN'	0	0	0	0	0	0		0	0		-0.000614565	0		0	0
'NADPHQR2'	0	0	0	0	0	0		0	0		5.00832e-26	0		0	0
'NADPHQR3'	0	0	0	0	0	0		0	0		1.13211	0		0	0
'NADPHQR4'	0	0	0	0	0	0		0	0		-0.00040971	0		0	0
'NADPPPS'	0	0	0	0	0	0		0	0		0	0		0	0
'NADS1'	0.00201733	0.000267283	0.000267283	6.1403e-12	0.000228196	0.000229052		0.000331955	0.000241948		0	0.000246612		0.000289359	0.00031501
'NADTRHD'	0	0	0	0	0	0		0	0		0	0		0	0
'NAMNPP'	0	2.00089e-11	0	2.00089e-11	2.00089e-11	0		2.00089e-11	0		-5.00222e-12	0		2.00089e-11	0
'NAt3_1p5pp'	0	0	132.123	-132.123	0	0		0	0		5.00832e-26	0		0	0
'NAt3_2pp'	0	0	0	0	0	0		0	0		-0.00040971	0		0	0
'NAt3pp'	999.996	999.999	735.754	264.246	0	0		0	0		1.00166e-25	0		0	0
'NAtex'	-4.51665e-14	0	0	0	0	0		0	0		5.00832e-26	0		0	0
'NDPK1'	-999.326	-999.908	-999.908	5.12705e-09	999.993	-999.696		-999.889	-985.077		5.00832e-26	-999.264		-999.616	-999.47
'NDPK2'	0.353414	0.0498956	0.0498956	2.76571e-09	0.0399774	0.0427587		0.0581548	0.0451661		5.00832e-26	0.0460367		0.0506924	0.0551862
'NDPK3'	0.136258	0.0212237	0.0180533	0.00317032	0.0154133	0.0181879		0.026359	0.0192119		-1.00044e-11	0.0166571		0.0229766	0.0250134
'NDPK4'	0.0231754	0.00307059	0.00307059	1.85328e-10	0.00262155	0.00263138		0.00381355	0.00277954		-8.50378e-11	0.00283311		0.0033242	0.00361888
'NDPK5'	0.0239281	0	0	0	0	0.00271685		0.00393742	0		1.50067e-11	0.00292513		0.00343217	0.00373642
'NDPK6'	0	-0.00307059	-0.00307059	-1.15296e-10	0	-0.00263138		3.63893e-14	-0.00277954		5.00832e-26	-0.00283311		0	0
'NDPK7'	0.0239281	2.50111e-11	0.00317032	-0.00317032	0.0027067	0		2.50111e-11	0		5.00832e-26	0.00292513		2.50111e-11	0
'NDPK8'	0.0231754	0.00307059	0.00307059	1.85328e-10	0	0.00263138		0.00381355	0		5.00832e-26	0.00283311		0	0
'NH4tex'	9.55004	1.26532	1.26532	6.96632e-08	1.08028	1.08433		1.57147	1.14538		1.50067e-11	1.16746		1.36982	1.49126
'NH4tpp'	9.55004	1.26532	1.26532	7.06737e-08	1.08028	1.08433		1.57147	1.14538		0	1.16746		1.36982	1.49126
'NHFRBO'	0	1.00044e-11	0	1.00044e-11	1.00044e-11	0		1.00044e-11	0		5.00832e-26	0		1.00044e-11	0
'NI2abcpp'	0	0	0	0	0	0		0	0		1.50067e-11	0		0	0
'NI2t3pp'	0	0	0	0	0	0		0	0		-3.00133e-11	0		0	0
'NI2tex'	0	0	0	0	0	0		0	0		5.00832e-26	0		0	0
'NI2tpp'	0	0	0	0	0	0		0	0		1.50067e-11	0		0	0
'NI2uabcpp'	0	0	0	0	0	0		0	0		2.00089e-11	0		0	0
'NMNAT'	1.58268e-27	0	0	0	0	0		0	0		5.00832e-26	0		0	0
'NMNDA'	0	0	0	0	0	0		0	0		5.00832e-26	0		0	0
'NMNN'	0	0	0	0	0	0		0	0		5.00832e-26	0		0	0
'NMNPtpp'	0	1.00044e-11	0	1.00044e-11	1.00044e-11	0		1.00044e-11	0		5.00832e-26	0		1.00044e-11	0
'NMNt7pp'	0	1.00044e-11	0	1.00044e-11	1.00044e-11	0		1.00044e-11	0		1.50067e-11	0		1.00044e-11	0
'NMNtex'	0	-5.00832e-26	0	-5.00832e-26	-5.00832e-26	0		-5.00832e-26	0		0	0		-5.00832e-26	0
'NNAM'	0	1.00044e-11	0	1.00044e-11	1.00044e-11	0		1.00044e-11	0		0	0		1.00044e-11	0
'NNATr'	0.00201733	0.000267283	0.000267283	6.13042e-12	0.000228196	0.000229052		0.000331955	0.000241948		1.66741e-12	0.000246612		0.000289359	0.00031501
'NNDMBRT'	0	0	0	0	0	0		0	0		-1.00044e-11	0		0	0
'NNDPR'	0.00201733	0.000267283	0.000267283	-1.38686e-11	0.000228196	0.000229052		0.000331955	0.000241948		5.00832e-26	0.000246612		0.000289359	0.00031501
'NO2t2rpp'	0	-3.70164e-10	0	-3.70164e-10	-3.70164e-10	0		-3.70164e-10	0		-5.00222e-11	0		-3.70164e-10	0
'NO2tex'	0	5.80258e-10	0	5.80258e-10	-4.00178e-10	0		-4.00178e-10	0		5.00832e-26	0		-4.00178e-10	0
'NO3R1bpp'	0	1.00044e-11	0	1.00044e-11	1.00044e-11	0		1.00044e-11	0		9.004e-11	0		1.00044e-11	0
'NO3R1pp'	0	1.70076e-10	0	1.70076e-10	0	0		0	0		-0.000979774	0		0	0
'NO3R2bpp'	0	1.00044e-11	0	1.00044e-11	1.00044e-11	0		1.00044e-11	0		-0.000921912	0		1.00044e-11	0
'NO3R2pp'	0	1.70076e-10	0	1.70076e-10	0	0		0	0		0	0		0	0
'NO3t7pp'	0	1.00044e-11	0	1.00044e-11	1.00044e-11	0		1.00044e-11	0		0	0		1.00044e-11	0
'NO3tex'	0	-5.00832e-26	0	-5.00832e-26	-5.00832e-26	0		-5.00832e-26	0		0	0		-5.00832e-26	0
'NODOx'	0	1.00044e-11	0	1.00044e-11	1.00044e-11	0		1.00044e-11	0		0	0		1.00044e-11	0
'NODOy'	0	1.00044e-11	0	1.00044e-11	1.00044e-11	0		1.00044e-11	0		0	0		1.00044e-11	0
'NOtex'	0	-1.00044e-11	0	-1.00044e-11	-1.00044e-11	0		-1.00044e-11	0		0	0		-1.00044e-11	0
'NOtpp'	0	1.00044e-11	0	1.00044e-11	1.00044e-11	0		1.00044e-11	0		0	0		1.00044e-11	0
'NPHS'	0	0	0	0	0	0		0	0		0	0		0	0
'NTD1'	4.10678e-28	0	0	0	0	0		0	0		0	0		0	0
'NTD10'	0	0	0	0	0	0		0	0		17.0199	0		0	0
'NTD10pp'	0	1.00044e-11	0	1.00044e-11	1.00044e-11	0		1.00044e-11	0		5.00832e-26	0		1.00044e-11	0
'NTD11'	0	0	0	0	0	0		0	0		5.00832e-26	0		0	0
'NTD11pp'	0	1.00044e-11	0	1.00044e-11	1.00044e-11	0		1.00044e-11	0		1.70076e-10	0		1.00044e-11	0
'NTD12'	0	0	0	0	0	0		0	0		2.00089e-11	0		0	0
'NTD12pp'	0	1.00044e-11	0	1.00044e-11	1.00044e-11	0		1.00044e-11	0		-1.00044e-11	0		1.00044e-11	0
'NTD1pp'	0	1.00044e-11	0	1.00044e-11	1.00044e-11	0		1.00044e-11	0		1.50067e-11	0		1.00044e-11	0
'NTD2'	0	-3.35134e-10	0	-3.35134e-10	0	0		0	0		5.00832e-26	0		0	0
'NTD2pp'	0	0	0	0	0	0		0	0		-1.00044e-11	0		0	0
'NTD3'	0	-2.50111e-11	0	-2.50111e-11	-2.50111e-11	0		-2.50111e-11	0		-1.00044e-11	0		-2.50111e-11	0
'NTD3pp'	0	1.00044e-11	0	1.00044e-11	1.00044e-11	0		1.00044e-11	0		5.00832e-26	0		1.00044e-11	0
'NTD4'	0	-1.20053e-10	0	-1.20053e-10	-1.20053e-10	0		-1.20053e-10	0		5.00832e-26	0		-1.20053e-10	0
'NTD4pp'	0	1.00044e-11	0	1.00044e-11	1.00044e-11	0		1.00044e-11	0		5.00832e-26	0		1.00044e-11	0
'NTD5'	0	-7.00311e-11	0	-7.00311e-11	-7.00311e-11	0		-7.00311e-11	0		1.50067e-11	0		-7.00311e-11	0
'NTD5pp'	0	1.00044e-11	0	1.00044e-11	1.00044e-11	0		1.00044e-11	0		5.00832e-26	0		1.00044e-11	0
'NTD6'	0	0	0	0	0	0		0	0		-6.50289e-11	0		0	0
'NTD6pp'	0	1.00044e-11	0	1.00044e-11	1.00044e-11	0		1.00044e-11	0		1.00044e-11	0		1.00044e-11	0
'NTD7'	0	0	0	0	0	0		0	0		5.00832e-26	0		0	0
'NTD7pp'	0	1.00044e-11	0	1.00044e-11	1.00044e-11	0		1.00044e-11	0		5.00832e-26	0		1.00044e-11	0
'NTD8'	-1.06641e-28	0	0	0	0	0		14.8106	0		5.00832e-26	0		-9.004e-11	0
'NTD8pp'	0	1.00044e-11	0	1.00044e-11	1.00044e-11	0		1.00044e-11	0		1.10049e-10	0		1.00044e-11	0
'NTD9'	0	0	0	0	0	0		0	0		5.00832e-26	0		0	0
'NTD9pp'	0	1.00044e-11	0	1.00044e-11	1.00044e-11	0		1.00044e-11	0		5.00832e-26	0		1.00044e-11	0
'NTP1'	0	0	0	0	0	0		0	0		0	0		0	0
'NTP10'	0	0	0	0	0	0		0	0		1.00044e-11	0		0	0
'NTP11'	0	0	0	0	0	0		0	0		-10	0		0	0
'NTP12'	0	0	0	0	0	0		0	0		-1.00044e-11	0		0	0
'NTP3'	0	0	0	0	0	0		0	0		1.00044e-11	0		0	0
'NTP3pp'	0	1.00044e-11	0	1.00044e-11	1.00044e-11	0		1.00044e-11	0		1.50067e-11	0		1.00044e-11	0
'NTP5'	0	0	0	0	0	0		0	0		1.70076e-10	0		0	0
'NTPP1'	0	0	0	0	0	0		0	0		5.00832e-26	0		0	0
'NTPP10'	0	0	0	0	0	0		0	0		-1.00044e-11	0		0	0
'NTPP11'	0	0	0	0	0	0		0	0		5.00832e-26	0		0	0
'NTPP2'	0	0	0	0	0	0		0	0		-5.00222e-11	0		0	0
'NTPP3'	0	0	0	0	0	0		0	0		5.00832e-26	0		0	0
'NTPP4'	0	0	0	0	0	0		0	0		5.00832e-26	0		0	0
'NTPP5'	0	0	0	0	0	0		0	0		-1.00044e-11	0		0	0
'NTPP6'	0	0	0	0	0	0		0	0		-3.00133e-11	0		0	0
'NTPP7'	0	0	0	0	0	0		0	0		-1.00044e-11	0		0	0
'NTPP8'	0	0	0	0	0	0		0	0		18.2676	0		0	0
'NTPP9'	0	0	0	0	0	0		0	0		5.00832e-26	0		0	0
'NTPTP1'	0	0	0	0	0	0		0	14.8395		1.00044e-10	0		0	0
'NTPTP2'	0	0	0	0	0	0		0	0		1.00044e-11	0		0	0
'NTRIR2x'	0	4.90218e-10	0	4.90218e-10	0	0		0	0		-1.00044e-11	0		0	0
'NTRIR3pp'	0	4.90218e-10	0	4.90218e-10	0	0		0	0		5.00832e-26	0		0	0
'NTRIR4pp'	0	4.90218e-10	0	4.90218e-10	0	0		0	0		-1.00044e-11	0		0	0
'O16A4COLIPAtex'	0	2.00089e-11	0	2.00089e-11	2.00089e-11	0		2.00089e-11	0		2.50111e-11	0		2.00089e-11	0
'O16A4Lpp'	0	2.00089e-11	0	2.00089e-11	2.00089e-11	0		2.00089e-11	0		3.00133e-11	0		2.00089e-11	0
'O16AP1pp'	0	1.00044e-11	0	1.00044e-11	1.00044e-11	0		1.00044e-11	0		4.54952	0		1.00044e-11	0
'O16AP2pp'	0	2.00089e-11	0	2.00089e-11	2.00089e-11	0		2.00089e-11	0		0	0		2.00089e-11	0
'O16AP3pp'	0	2.00089e-11	0	2.00089e-11	2.00089e-11	0		2.00089e-11	0		36.4791	0		2.00089e-11	0
'O16AT'	0	0	0	0	0	0		0	0		0	0		0	0
'O16AUNDtpp'	0	0	0	0	0	0		0	0		0	0		0	0
'O16GALFT'	0	0	0	0	0	0		0	0		0	0		0	0
'O16GLCT1'	0	0	0	0	0	0		0	0		0	0		0	0
'O16GLCT2'	0	0	0	0	0	0		0	0		1.00044e-11	0		0	0
'O2Stex'	0	0	0	0	0	0		0	0		-1.00044e-11	0		0	0
'O2tex'	18.5	12.3983	12.3983	3.59896e-07	1.95364e-10	0		3.97943	8.36843		0	16.9431		18.5	14.902
'O2tpp'	18.5	12.3983	12.3983	3.59861e-07	1.60348e-10	0		3.97943	8.36843		-1.00044e-11	16.9431		18.5	14.902
'OAADC'	0	0	0	0	0	0		0	0		-3.00133e-11	0		0	0
'OBTFL'	0	0	0	0	0	0		0	0		-3.00133e-11	0		0	0
'OCBT'	0.261952	0.0347069	0.0347069	2.08426e-09	0.0296315	0.0297426		0.0431046	0.0314172		-1.00044e-11	0.0320227		0.0375734	0.0409043
'OCDCAtexi'	0	0	0	0	0	0		0	0		5.00832e-26	0		0	0
'OCDCEAtexi'	0	0	0	0	0	0		0	0		-1.00044e-11	0		0	0
'OCTAtex'	0	-5.00832e-26	0	-5.00832e-26	-5.00832e-26	0		-5.00832e-26	0		1.50067e-11	0		-5.00832e-26	0
'OCTDPS'	0.000197482	2.61651e-05	2.61651e-05	2.68732e-12	2.23388e-05	2.24226e-05		3.24961e-05	2.3685e-05		-5.00222e-11	2.41415e-05		2.83262e-05	3.08372e-05
'ODECOAI'	0	0	0	0	0	0		0	0		5.00832e-26	0		0	0
'OHPBAT'	0.000197482	2.61651e-05	2.61651e-05	1.58388e-12	2.23388e-05	2.24226e-05		3.24961e-05	2.3685e-05		-0.0230413	2.41415e-05		2.83262e-05	3.08372e-05
'OHPHM'	0	1.10845e-12	0	1.10845e-12	1.10845e-12	0		1.10845e-12	0		0	0		1.10845e-12	0
'OMBZLM'	0	1.10845e-12	0	1.10845e-12	1.10845e-12	0		1.10845e-12	0		-3.00133e-11	0		1.10845e-12	0
'OMCDC'	0.39895	0.0528582	0.0528582	3.1796e-09	0.0451284	0.0452976		0.0656479	0.047848		1.30058e-10	0.0487702		0.0572239	0.0622968
'OMMBLHX'	0	0	0	0	0	0		0	0		1.75078e-11	0		0	0
'OMMBLHX3'	0	0	0	0	0	0		0	0		-1.00044e-11	0		0	0
'OMPDC'	0.292938	0.0388124	0.0388124	1.7918e-09	0.0331365	0.0332608		0.0482035	0.0351335		0	0.0358107		0.042018	0.0457428
'OMPHHX'	0	5.54223e-13	0	5.54223e-13	5.54223e-13	0		5.54223e-13	0		0	0		5.54223e-13	0
'OMPHHX3'	0	5.54223e-13	0	5.54223e-13	5.54223e-13	0		5.54223e-13	0		-1.00044e-11	0		5.54223e-13	0
'OP4ENH'	0	3.00133e-11	0	3.00133e-11	3.00133e-11	0		3.00133e-11	0		5.00832e-26	0		3.00133e-11	0
'OPHBDC'	0.000197482	2.61651e-05	2.61651e-05	2.68732e-12	2.23388e-05	2.24226e-05		3.24961e-05	2.3685e-05		5.00832e-26	2.41415e-05		2.83262e-05	3.08372e-05
'OPHHX'	0.000197482	2.61651e-05	2.61651e-05	2.68732e-12	0	0		3.24961e-05	2.3685e-05		5.00832e-26	2.41415e-05		2.83262e-05	3.08372e-05
'OPHHX3'	0	0	0	0	2.23388e-05	2.24226e-05		0	0		0	0		0	0
'ORNDC'	0	0	0	0	0	0		0	0		0	0		0	0
'ORNabcpp'	0	0	0	0	0	0		0	0		0	0		0	0
'ORNtex'	0	1.00044e-11	0	1.00044e-11	1.00044e-11	0		1.00044e-11	0		0	0		1.00044e-11	0
'OROTt2_2pp'	0	1.00044e-11	0	1.00044e-11	1.00044e-11	0		1.00044e-11	0		0	0		1.00044e-11	0
'OROTtex'	0	-5.00832e-26	0	-5.00832e-26	-5.00832e-26	0		-5.00832e-26	0		5.00832e-26	0		-5.00832e-26	0
'ORPT'	-0.292938	-0.0388124	-0.0388124	-1.79182e-09	-0.0331365	-0.0332608		-0.0482035	-0.0351335		5.00832e-26	-0.0358107		-0.042018	-0.0457428
'OXAMTC'	0	3.00133e-11	0	3.00133e-11	0	0		0	0		5.00832e-26	0		0	0
'OXGDC2'	0	0	0	0	0	0		0	0		-5.00222e-12	0		0	0
'P5CD'	0	0	0	0	0	0		0	0		0	0		0	0
'P5CR'	0.1958	0.0259422	0.0259422	1.54541e-09	0.0221485	0.0222315		0.0322192	0.0234832		5.00832e-26	0.0239358		0.0280848	0.0305745
'PA120abcpp'	0	0	0	0	0	0		2.00089e-11	0		5.00832e-26	0		0	0
'PA140abcpp'	-1.78514e-30	0	0	0	0	0		0	0		5.00832e-26	0		0	0
'PA141abcpp'	7.94537e-34	0	0	0	0	0		0	0		-0.00102427	0		0	0
'PA160abcpp'	0	0	0	0	0	0		0	0		0	0		0	0
'PA161abcpp'	0	3.00133e-11	0	3.00133e-11	0	0		0	0		5.00832e-26	0		0	0
'PA180abcpp'	0	0	0	0	0	0		0	0		-0.00040971	0		0	0
'PA181abcpp'	0	0	0	0	0	0		0	0		5.00832e-26	0		0	0
'PACALDt2rpp'	0	0	0	0	0	0		0	0		-0.00040971	0		0	0
'PACALDtex'	0	-1.00044e-11	0	-1.00044e-11	-1.00044e-11	0		-1.00044e-11	0		5.00832e-26	0		-1.00044e-11	0
'PACCOAL'	0	0	0	0	0	0		0	0		1.00044e-11	0		0	0
'PANTS'	0.000510089	6.75834e-05	6.75834e-05	4.1771e-12	5.77002e-05	5.79166e-05		8.3936e-05	6.11774e-05		0	6.23566e-05		7.31653e-05	7.96514e-05
'PAPA120'	-8.83845e-28	0	0	0	0	0		0	0		5.00832e-26	0		0	0
'PAPA120pp'	8.83844e-28	0	0	0	0	0		0	0		-1.39909	0		0	0
'PAPA140'	0	0	0	0	0	0		0	0		0	0		0	0
'PAPA140pp'	0	0	0	0	0	0		0	0		5.00832e-26	0		0	0
'PAPA141'	0	0	0	0	0	0		0	0		4.00178e-10	0		0	0
'PAPA141pp'	0	0	0	0	0	0		0	0		5.00832e-26	0		0	0
'PAPA160'	0	0	0	0	0	0		0	0		1.00044e-11	0		0	0
'PAPA160pp'	0	0	0	0	0	0		0	0		2.00089e-11	0		0	0
'PAPA161'	0	0	0	0	0	0		0	0		-18.5	0		0	0
'PAPA161pp'	0	0	0	0	0	0		0	0		0	0		0	0
'PAPA180'	0	0	0	0	0	0		0	0		0	0		0	0
'PAPA180pp'	0	0	0	0	0	0		0	0		0	0		0	0
'PAPA181'	0	0	0	0	0	0		0	0		5.00832e-26	0		0	0
'PAPA181pp'	0	0	0	0	0	0		0	0		-1.00044e-11	0		0	0
'PAPPT3'	0.0246012	0.00325949	0.00325949	1.86682e-10	0.00278284	0.00279327		0.00404816	0.00295054		5.00832e-26	0.00300741		0.0035287	0.00384152
'PAPSR'	0.218118	0	0	0	0	0.0247656		0	0.0261599		1.00044e-11	0.0266642		0	0
'PAPSR2'	0	0.0288992	0.0288992	1.46383e-09	0.024673	0		0.0358917	0		5.00832e-26	0		0.0312861	0.0340595
'PDE1'	0	0	0	0	0	0		0	0		-4.00178e-11	0		0	0
'PDH'	8.91905	0	0	0	0.304877	0.0926106		0	8.78661		0	0		0	0
'PDX5PO2'	0.000197482	2.61651e-05	2.61651e-05	1.57887e-12	2.23388e-05	2.24226e-05		3.24961e-05	2.3685e-05		-0.124718	2.41415e-05		2.83262e-05	3.08372e-05
'PDX5POi'	0	0	0	0	0	0		0	0		5.00832e-26	0		0	0
'PDX5PS'	0.000197482	2.61651e-05	2.61651e-05	1.57887e-12	2.23388e-05	2.24226e-05		3.24961e-05	2.3685e-05		5.00832e-26	2.41415e-05		2.83262e-05	3.08372e-05
'PDXPP'	0	0	0	0	0	0		0	0		1.00044e-11	0		0	0
'PE120abcpp'	0	-2.00089e-11	0	-2.00089e-11	0	0		-2.00089e-11	0		1.00044e-11	0		0	0
'PE140abcpp'	0	0	0	0	0	0		0	0		5.00832e-26	0		0	0
'PE141abcpp'	0	0	0	0	0	0		0	0		-1.00044e-11	0		0	0
'PE160abcpp'	0.0367335	0.00486694	0.00486694	2.93685e-10	0.00415522	0.0041708		0.00604456	0.00440562		5.00832e-26	0.00449054		0.00526892	0.005736
'PE161abcpp'	0.0432956	0.00573638	0.00573638	3.46148e-10	0.0048975	0.00491587		0.00712436	0.00519265		5.00832e-26	0.00529273		0.00621016	0.00676069
'PE180abcpp'	0	0	0	0	0	0		0	0		5.00832e-26	0		0	0
'PE181abcpp'	0	0	0	0	0	0		0	0		-1.00044e-11	0		0	0
'PEAMNOpp'	0	1.00044e-11	0	1.00044e-11	1.00044e-11	0		1.00044e-11	0		-3.00133e-11	0		1.00044e-11	0
'PEAMNtex'	0	-5.00832e-26	0	-5.00832e-26	-5.00832e-26	0		-5.00832e-26	0		5.00832e-26	0		-5.00832e-26	0
'PERD'	0.000197482	2.61651e-05	2.61651e-05	1.58388e-12	2.23388e-05	2.24226e-05		3.24961e-05	2.3685e-05		1.50067e-11	2.41415e-05		2.83262e-05	3.08372e-05
'PETNT161pp'	0	0	0	0	0	0		0	0		5.00832e-26	0		0	0
'PETNT181pp'	0	0	0	0	0	0		0	0		5.00832e-26	0		0	0
'PFK'	7.64384	9.89835	4.23616	5.6622	8.26559	8.47249		0	0		5.00832e-26	0		9.88996	9.8802
'PFK_2'	0	1.00044e-11	0	1.00044e-11	1.00044e-11	0		1.00044e-11	0		-1.00044e-11	0		1.00044e-11	0
'PFL'	0	15.3289	15.3289	1.09392e-06	0.0708619	0.177832		8.57816	0.187845		5.00832e-26	18.8396		6.14785	8.18786
'PG120abcpp'	0	2.00089e-11	0	2.00089e-11	0	0		0	0		0	0		0	0
'PG140abcpp'	0	0	0	0	0	0		0	0		1.50067e-11	0		0	0
'PG141abcpp'	0	0	0	0	0	0		0	0		-0.0324667	0		0	0
'PG160abcpp'	0	0	0	0	0	0		0	0		5.00832e-26	0		0	0
'PG161abcpp'	0	-3.00133e-11	0	-3.00133e-11	0	0		0	0		-1.00044e-11	0		0	0
'PG180abcpp'	0	0	0	0	0	0		0	0		5.00832e-26	0		0	0
'PG181abcpp'	0	0	0	0	0	0		0	0		5.00832e-26	0		0	0
'PGAMT'	-0.0836511	-0.0110832	-0.0110832	-6.48753e-10	-0.00946244	-0.00949792		-0.0137649	-0.0100327		1.00044e-11	-0.0102261		-0.0119986	-0.0130623
'PGCD'	1.51951	0.201325	0.201325	1.09637e-08	0.106306	0		0.250038	0		5.00832e-26	9.83485		19.6962	19.6692
'PGI'	5.23311	10	10	3.627e-10	8.3524	8.34622		10	0		1.50067e-11	0.093787		3.77668e-10	10
'PGK'	-16.2929	-19.7194	-19.7194	1.21764e-08	-18.1127	-18.3191		-9.77769	-9.85298		5.00832e-26	-9.83485		-19.6962	-19.6692
'PGL'	4.76689	-1.00044e-11	0	-1.00044e-11	1.6476	1.65378		-1.00044e-11	0		-1.00044e-11	0		-8.00355e-11	0
'PGLYCP'	0	0	0	0	0	0		0	0		5.00832e-26	0		0	0
'PGM'	-14.7734	-19.518	-19.518	2.314e-08	-18.0064	-18.3191		-9.52766	-9.85298		-1.00044e-11	0		0	0
'PGMT'	0	2.4761e-10	0	2.4761e-10	2.4761e-10	0		1.47566e-10	0		-5.00222e-11	0		2.4761e-10	0
'PGP120abcpp'	0	0	0	0	0	0		0	0		2.00089e-11	0		0	0
'PGP140abcpp'	0	0	0	0	0	0		0	0		5.00832e-26	0		0	0
'PGP141abcpp'	0	0	0	0	0	0		0	0		5.00832e-26	0		0	0
'PGP160abcpp'	0	0	0	0	0	0		0	0		-3.00133e-11	0		0	0
'PGP161abcpp'	0	0	0	0	0	0		0	0		5.00832e-26	0		0	0
'PGP180abcpp'	0	0	0	0	0	0		0	0		0	0		0	0
'PGP181abcpp'	0	0	0	0	0	0		0	0		0	0		0	0
'PGPP120'	0	2.00089e-11	0	2.00089e-11	0	0		0	0		0	0		0	0
'PGPP120pp'	0	0	0	0	0	0		0	0		5.00832e-26	0		0	0
'PGPP140'	0	0	0	0	0	0		0	0		-6.00267e-11	0		0	0
'PGPP140pp'	0	0	0	0	0	0		0	0		5.00832e-26	0		0	0
'PGPP141'	0	0	0	0	0	0		0	0		5.00832e-26	0		0	0
'PGPP141pp'	0	0	0	0	0	0		0	0		5.00832e-26	0		0	0
'PGPP160'	7.77526e-27	0	0	0	0	0		0	0		5.00832e-26	0		0	0
'PGPP160pp'	0	0	0	0	0	0		0	0		5.00832e-26	0		0	0
'PGPP161'	-4.7873e-28	-3.00133e-11	0	-3.00133e-11	0	0		0	0		5.00832e-26	0		0	0
'PGPP161pp'	0	0	0	0	0	0		0	0		1.60071e-10	0		0	0
'PGPP180'	0	0	0	0	0	0		0	0		-3.00133e-11	0		0	0
'PGPP180pp'	0	0	0	0	0	0		0	0		1.00044e-11	0		0	0
'PGPP181'	0	0	0	0	0	0		0	0		-2.45109e-10	0		0	0
'PGPP181pp'	0	0	0	0	0	0		0	0		-1.00044e-11	0		0	0
'PGSA120'	0	2.00089e-11	0	2.00089e-11	0	0		0	0		-1.00044e-11	0		0	0
'PGSA140'	0	0	0	0	0	0		0	0		5.00832e-26	0		0	0
'PGSA141'	0	0	0	0	0	0		0	0		-5.00222e-11	0		0	0
'PGSA160'	7.77666e-27	0	0	0	0	0		0	0		5.00832e-26	0		0	0
'PGSA161'	-4.78676e-28	-3.00133e-11	0	-3.00133e-11	0	0		0	0		5.00832e-26	0		0	0
'PGSA180'	0	0	0	0	0	0		0	0		-0.00040971	0		0	0
'PGSA181'	0	0	0	0	0	0		0	0		0.129737	0		0	0
'PHEMEabcpp'	0	0	0	0	0	0		0	0		8.98507	0		0	0
'PHEMEtiex'	0	0	0	0	0	0		0	0		0	0		0	0
'PHETA1'	-0.155772	-0.0206388	-0.0206388	-1.20538e-09	-0.0176206	-0.0176867		-0.0256325	-0.0186825		1.00044e-11	-0.0190426		-0.0223434	-0.0243241
'PHETRS'	0	0	0	0	0	0		0	0		-5.00832e-26	0		0	0
'PHEt2rpp'	0	4.00178e-11	0	4.00178e-11	4.00178e-11	0		4.00178e-11	0		0	0		4.00178e-11	0
'PHEtex'	0	4.00178e-11	0	4.00178e-11	4.00178e-11	0		4.00178e-11	0		0	0		4.00178e-11	0
'PHYTSpp'	0	5.00222e-12	0	5.00222e-12	5.00222e-12	0		5.00222e-12	0		0	0		5.00222e-12	0
'PIt2rpp'	0.851314	0.112793	0.112793	6.75038e-09	0.0962988	0.0966599		0.140085	0.102102		0	0.10407		0.122109	0.132934
'PItex'	0.851314	0.112793	0.112793	6.1251e-09	0.0962988	0.0966599		0.140085	0.102102		0	0.10407		0.122109	0.132934
'PIuabcpp'	0	0	0	0	0	0		0	0		0	0		0	0
'PLIPA1A120pp'	0	2.00089e-11	0	2.00089e-11	0	0		0	0		0	0		0	0
'PLIPA1A140pp'	0	0	0	0	0	0		0	0		3.00133e-11	0		0	0
'PLIPA1A141pp'	0	0	0	0	0	0		0	0		0	0		6.00267e-11	0
'PLIPA1A160pp'	0	0	0	0	0	0		0	0		-1.20053e-10	0		0	0
'PLIPA1A161pp'	0	0	0	0	0	0		0	0		0	0		0	0
'PLIPA1A180pp'	0	0	0	0	0	0		0	0		0	0		0	0
'PLIPA1A181pp'	0	0	0	0	0	0		0	0		0	0		0	0
'PLIPA1E120pp'	0	-2.00089e-11	0	-2.00089e-11	0	0		0	0		0	0		0	0
'PLIPA1E140pp'	0	0	0	0	0	0		0	0		0	0		0	0
'PLIPA1E141pp'	0	0	0	0	0	0		0	0		-1.00044e-11	0		0	0
'PLIPA1E160pp'	0	0	0	0	0	0		0	0		0	0		0	0
'PLIPA1E161pp'	0	0	0	0	4.00178e-11	0		0	0		1.00044e-11	0		0	0
'PLIPA1E180pp'	0	0	0	0	0	0		0	0		0	0		0	0
'PLIPA1E181pp'	0	0	0	0	0	0		0	0		0	0		0	0
'PLIPA1G120pp'	0	0	0	0	0	0		0	0		-1.20053e-10	0		0	0
'PLIPA1G140pp'	0	0	0	0	0	0		0	0		0	0		0	0
'PLIPA1G141pp'	0	0	0	0	0	0		0	0		0	0		0	0
'PLIPA1G160pp'	0	0	0	0	0	0		0	0		0	0		0	0
'PLIPA1G161pp'	0	0	0	0	0	0		0	0		0	0		0	0
'PLIPA1G180pp'	0	0	0	0	0	0		0	0		0	0		0	0
'PLIPA1G181pp'	0	0	0	0	0	0		0	0		1.00044e-11	0		0	0
'PLIPA2A120pp'	-8.83846e-28	-2.00089e-11	0	-2.00089e-11	0	0		3.00133e-11	0		0	0		0	0
'PLIPA2A140pp'	-1.78584e-30	0	0	0	0	0		0	0		0	0		0	0
'PLIPA2A141pp'	7.94537e-34	0	0	0	0	0		0	0		-1.00044e-11	0		-6.00267e-11	0
'PLIPA2A160pp'	0	0	0	0	0	0		0	0		-9.004e-11	0		0	0
'PLIPA2A161pp'	0	3.00133e-11	0	3.00133e-11	0	0		0	0		-9.004e-11	0		0	0
'PLIPA2A180pp'	0	0	0	0	0	0		0	0		-3.00133e-11	0		0	0
'PLIPA2A181pp'	0	0	0	0	0	0		0	0		0.902536	0		0	0
'PLIPA2E120pp'	0	0	0	0	0	0		-2.00089e-11	0		0	0		0	0
'PLIPA2E140pp'	0	0	0	0	0	0		0	0		5.16988e-26	0		0	0
'PLIPA2E141pp'	0	0	0	0	0	0		0	0		5.16988e-26	0		0	0
'PLIPA2E160pp'	0	0	0	0	0	0		0	0		5.16988e-26	0		0	0
'PLIPA2E161pp'	0	0	0	0	-1.99847e-11	0		0	0		2.89314e-05	0		0	0
'PLIPA2E180pp'	0	0	0	0	0	0		0	0		0	0		0	0
'PLIPA2E181pp'	0	0	0	0	0	0		0	0		0	0		0	0
'PLIPA2G120pp'	0	2.00089e-11	0	2.00089e-11	0	0		-1.00044e-11	0		1.00044e-11	0		0	0
[truncated: 384 more rows]
