# Supplementary material for: FOCuS: a metaheuristic algorithm for computing knockouts from genome-scale models for strain optimization
Source: Royal Society of Chemistry journal article supplement (doi:10.1039/c7mb00204a), 2017-05-08
Supplement: c7mb00204a3.xlsx [file c7mb00204a3.xlsx]

## Sheet: Sheet1
Sections		30			30			20			20			15			10
Generations		1			1			1			1			1			1
Iterations		1			2			3			4			5			6
Time (min)		30-40			30-40			25-30			25-30			15-20			~10
	counter	rxn_index		counter	rxn_index		counter	rxn_index		counter	rxn_index		counter	rxn_index		counter	rxn_index
	1	8		1	8		1	8		1	8		1	8		1	8
	2	13		2	13		2	14		2	14		2	14		2	15
	3	14		3	14		3	15		3	15		3	15		3	16
	4	15		4	15		4	16		4	16		4	16		4	20
	5	16		5	16		5	17		5	17		5	20		5	21
	6	17		6	17		6	20		6	20		6	21		6	28
	7	19		7	19		7	21		7	21		7	22		7	30
	8	20		8	20		8	22		8	22		8	26		8	36
	9	21		9	21		9	24		9	24		9	27		9	47
	10	22		10	22		10	26		10	26		10	28		10	49
	11	23		11	23		11	27		11	27		11	30		11	53
	12	24		12	24		12	28		12	28		12	31		12	62
	13	25		13	25		13	30		13	30		13	36		13	63
	14	26		14	26		14	31		14	31		14	47		14	64
	15	27		15	27		15	36		15	36		15	49		15	65
	16	28		16	28		16	40		16	47		16	53		16	68
	17	30		17	30		17	42		17	49		17	56		17	70
	18	31		18	31		18	45		18	53		18	59		18	72
	19	32		19	32		19	47		19	56		19	62		19	74
	20	34		20	34		20	49		20	59		20	63		20	89
	21	36		21	36		21	50		21	62		21	64		21	101
	22	40		22	40		22	53		22	63		22	65		22	116
	23	41		23	41		23	56		23	64		23	66		23	117
	24	42		24	42		24	58		24	65		24	68		24	122
	25	43		25	43		25	59		25	66		25	70		25	126
	26	44		26	44		26	62		26	68		26	72		26	127
	27	45		27	45		27	63		27	70		27	74		27	129
	28	46		28	47		28	64		28	72		28	89		28	130
	29	47		29	49		29	65		29	74		29	101		29	134
	30	49		30	50		30	66		30	89		30	115		30	136
	31	50		31	52		31	68		31	93		31	116		31	139
	32	51		32	53		32	70		32	101		32	117		32	141
	33	52		33	56		33	72		33	115		33	120		33	142
	34	53		34	58		34	74		34	116		34	122		34	149
	35	56		35	59		35	89		35	117		35	124		35	151
	36	58		36	60		36	93		36	119		36	126		36	152
	37	59		37	61		37	95		37	120		37	127		37	160
	38	60		38	62		38	101		38	122		38	129		38	172
	39	61		39	63		39	115		39	124		39	130		39	173
	40	62		40	64		40	116		40	126		40	131		40	181
	41	63		41	65		41	117		41	127		41	133		41	183
	42	64		42	66		42	119		42	129		42	134		42	184
	43	65		43	68		43	120		43	130		43	136		43	190
	44	66		44	70		44	122		44	131		44	138		44	197
	45	68		45	72		45	124		45	133		45	139		45	207
	46	70		46	74		46	126		46	134		46	141		46	209
	47	72		47	89		47	127		47	136		47	142		47	212
	48	74		48	93		48	129		48	138		48	147		48	214
	49	83		49	95		49	130		49	139		49	149		49	215
	50	84		50	101		50	131		50	141		50	151		50	217
	51	89		51	115		51	133		51	142		51	152		51	220
	52	93		52	116		52	134		52	147		52	159		52	227
	53	95		53	117		53	136		53	149		53	160		53	228
	54	101		54	119		54	138		54	151		54	162		54	236
	55	108		55	120		55	139		55	152		55	170		55	238
	56	112		56	122		56	141		56	159		56	172		56	249
	57	114		57	124		57	142		57	160		57	173		57	256
	58	115		58	126		58	143		58	162		58	174		58	258
	59	116		59	127		59	147		59	170		59	177		59	263
	60	117		60	128		60	149		60	172		60	180		60	269
	61	119		61	129		61	151		61	173		61	181		61	271
	62	120		62	130		62	152		62	174		62	183		62	272
	63	122		63	131		63	159		63	177		63	184		63	275
	64	124		64	133		64	160		64	180		64	190		64	276
	65	126		65	134		65	162		65	181		65	197		65	277
	66	127		66	136		66	170		66	183		66	207		66	280
	67	128		67	138		67	171		67	184		67	209		67	290
	68	129		68	139		68	172		68	190		68	211		68	293
	69	130		69	141		69	173		69	197		69	212		69	294
	70	131		70	142		70	174		70	199		70	214		70	296
	71	133		71	143		71	177		71	207		71	215		71	304
	72	134		72	147		72	179		72	209		72	216		72	306
	73	136		73	148		73	180		73	211		73	217		73	308
	74	137		74	149		74	181		74	212		74	220		74	316
	75	138		75	151		75	183		75	214		75	227		75	330
	76	139		76	152		76	184		76	215		76	228		76	334
	77	140		77	156		77	189		77	216		77	236		77	335
	78	141		78	159		78	190		78	217		78	237		78	340
	79	142		79	160		79	197		79	220		79	238		79	343
	80	143		80	161		80	199		80	227		80	245		80	349
	81	147		81	162		81	207		81	228		81	249		81	366
	82	148		82	170		82	209		82	229		82	256		82	367
	83	149		83	171		83	211		83	236		83	258		83	368
	84	151		84	172		84	212		84	237		84	262		84	370
	85	152		85	173		85	214		85	238		85	263		85	377
	86	156		86	174		86	215		86	242		86	269		86	378
	87	157		87	176		87	216		87	245		87	271		87	380
	88	159		88	177		88	217		88	248		88	272		88	381
	89	160		89	179		89	218		89	249		89	275		89	384
	90	161		90	180		90	220		90	256		90	276		90	386
	91	162		91	181		91	227		91	257		91	277		91	400
	92	163		92	183		92	228		92	258		92	280		92	403
	93	170		93	184		93	229		93	262		93	290		93	404
	94	171		94	189		94	236		94	263		94	293		94	407
	95	172		95	190		95	237		95	269		95	294		95	410
	96	173		96	197		96	238		96	271		96	296		96	416
	97	174		97	199		97	242		97	272		97	297		97	430
	98	176		98	204		98	245		98	275		98	304		98	431
	99	177		99	206		99	248		99	276		99	306		99	443
	100	179		100	207		100	249		100	277		100	308		100	451
	101	180		101	209		101	256		101	280		101	316		101	454
	102	181		102	210		102	257		102	287		102	330		102	466
	103	182		103	211		103	258		103	289		103	334		103	470
	104	183		104	212		104	262		104	290		104	335		104	484
	105	184		105	213		105	263		105	292		105	340		105	491
	106	189		106	214		106	269		106	293		106	343		106	500
	107	190		107	215		107	270		107	294		107	349		107	501
	108	195		108	216		108	271		108	296		108	359		108	508
	109	197		109	217		109	272		109	297		109	366		109	510
	110	199		110	218		110	275		110	300		110	367		110	514
	111	204		111	219		111	276		111	304		111	368		111	516
	112	206		112	220		112	277		112	306		112	370		112	517
	113	207		113	227		113	280		113	308		113	377		113	522
	114	209		114	228		114	287		114	316		114	378		114	534
	115	210		115	229		115	289		115	319		115	380		115	535
	116	211		116	236		116	290		116	330		116	381		116	536
	117	212		117	237		117	292		117	331		117	384		117	541
	118	213		118	238		118	293		118	334		118	386		118	551
	119	214		119	240		119	294		119	335		119	391		119	563
	120	215		120	242		120	296		120	340		120	400		120	565
	121	216		121	245		121	297		121	343		121	402		121	569
	122	217		122	248		122	298		122	349		122	403		122	571
	123	218		123	249		123	300		123	350		123	404		123	581
	124	219		124	251		124	304		124	359		124	407		124	589
	125	220		125	256		125	306		125	365		125	408		125	592
	126	227		126	257		126	307		126	366		126	410		126	608
	127	228		127	258		127	308		127	367		127	412		127	609
	128	229		128	262		128	311		128	368		128	413		128	611
	129	233		129	263		129	316		129	370		129	416		129	612
	130	234		130	265		130	319		130	377		130	418		130	630
	131	236		131	267		131	330		131	378		131	430		131	641
	132	237		132	269		132	331		132	380		132	431		132	646
	133	238		133	270		133	334		133	381		133	443		133	656
	134	239		134	271		134	335		134	384		134	451		134	657
	135	240		135	272		135	340		135	386		135	454		135	660
	136	241		136	275		136	343		136	391		136	465		136	662
	137	242		137	276		137	344		137	400		137	466		137	678
	138	245		138	277		138	349		138	402		138	470		138	688
	139	248		139	278		139	350		139	403		139	481		139	692
	140	249		140	280		140	359		140	404		140	484		140	695
	141	251		141	281		141	365		141	407		141	487		141	696
	142	256		142	284		142	366		142	408		142	491		142	698
	143	257		143	285		143	367		143	409		143	497		143	701
	144	258		144	287		144	368		144	410		144	500		144	703
	145	262		145	289		145	370		145	412		145	501		145	1006
	146	263		146	290		146	377		146	413		146	508		146	1008
	147	265		147	291		147	378		147	416		147	510		147	1011
	148	267		148	292		148	380		148	418		148	514		148	1015
	149	268		149	293		149	381		149	420		149	516		149	1018
	150	269		150	294		150	384		150	429		150	517		150	1023
	151	270		151	295		151	386		151	430		151	522		151	1031
	152	271		152	296		152	388		152	431		152	534		152	1042
	153	272		153	297		153	391		153	441		153	535		153	1044
	154	274		154	298		154	400		154	443		154	536		154	1045
	155	275		155	300		155	402		155	444		155	540		155	1049
	156	276		156	304		156	403		156	451		156	541		156	1053
	157	277		157	306		157	404		157	452		157	551		157	1054
	158	278		158	307		158	407		158	454		158	563		158	1055
	159	280		159	308		159	408		159	457		159	565		159	1056
	160	281		160	311		160	409		160	465		160	568		160	1062
	161	284		161	314		161	410		161	466		161	569		161	1064
	162	285		162	316		162	411		162	470		162	571		162	1072
	163	287		163	319		163	412		163	481		163	578		163	1076
	164	289		164	323		164	413		164	484		164	579		164	1091
	165	290		165	324		165	416		165	487		165	581		165	1103
	166	291		166	329		166	417		166	491		166	589		166	1114
	167	292		167	330		167	418		167	492		167	592		167	1139
	168	293		168	331		168	420		168	497		168	608		168	1151
	169	294		169	333		169	421		169	500		169	609		169	1155
	170	295		170	334		170	429		170	501		170	610		170	1163
	171	296		171	335		171	430		171	508		171	611		171	1168
	172	297		172	340		172	431		172	510		172	612		172	1171
	173	298		173	343		173	441		173	514		173	630		173	1177
	174	300		174	344		174	443		174	515		174	635		174	1183
	175	302		175	347		175	444		175	516		175	641		175	1186
	176	303		176	349		176	451		176	517		176	646		176	1197
	177	304		177	350		177	452		177	522		177	647		177	1202
	178	306		178	359		178	453		178	533		178	656		178	1204
	179	307		179	363		179	454		179	534		179	657		179	1205
	180	308		180	365		180	457		180	535		180	660		180	1206
	181	310		181	366		181	465		181	536		181	662		181	1209
	182	311		182	367		182	466		182	540		182	667		182	1216
	183	314		183	368		183	469		183	541		183	678		183	1225
	184	316		184	370		184	470		184	545		184	688		184	1228
	185	319		185	372		185	481		185	546		185	692		185	1233
	186	323		186	377		186	484		186	551		186	695		186	1234
	187	324		187	378		187	487		187	557		187	696		187	1244
	188	329		188	380		188	488		188	563		188	698		188	1248
	189	330		189	381		189	491		189	565		189	701		189	1258
	190	331		190	384		190	492		190	568		190	703		190	1280
	191	333		191	385		191	497		191	569		191	1006		191	1344
	192	334		192	386		192	498		192	571		192	1008		192	1366
	193	335		193	388		193	500		193	578		193	1011		193	1367
	194	338		194	391		194	501		194	579		194	1015		194	1370
	195	340		195	400		195	508		195	581		195	1018		195	1372
	196	343		196	401		196	510		196	589		196	1023		196	1373
	197	344		197	402		197	511		197	592		197	1031		197	1375
	198	345		198	403		198	514		198	608		198	1042		198	1380
	199	347		199	404		199	515		199	609		199	1044		199	1381
	200	348		200	406		200	516		200	610		200	1045		200	1385
	201	349		201	407		201	517		201	611		201	1049		201	1386
	202	350		202	408		202	519		202	612		202	1051		202	1392
	203	352		203	409		203	522		203	630		203	1053		203	1400
	204	353		204	410		204	533		204	635		204	1054		204	1402
	205	359		205	411		205	534		205	641		205	1055		205	1412
	206	362		206	412		206	535		206	646		206	1056		206	1413
	207	363		207	413		207	536		207	647		207	1060		207	1420
	208	365		208	416		208	539		208	656		208	1061		208	1440
	209	366		209	417		209	540		209	657		209	1062		209	1444
	210	367		210	418		210	541		210	660		210	1064		210	1446
	211	368		211	419		211	545		211	662		211	1072		211	1448
	212	370		212	420		212	546		212	667		212	1076		212	1473
	213	372		213	421		213	551		213	678		213	1091		213	1475
	214	377		214	429		214	557		214	680		214	1103		214	1483
	215	378		215	430		215	559		215	681		215	1105		215	1487
	216	380		216	431		216	563		216	688		216	1114		216	1488
	217	381		217	441		217	565		217	692		217	1119		217	1494
	218	384		218	442		218	568		218	693		218	1139		218	1495
	219	385		219	443		219	569		219	695		219	1151		219	1496
	220	386		220	444		220	571		220	696		220	1155		220	1499
	221	388		221	450		221	578		221	698		221	1163		221	1505
	222	390		222	451		222	579		222	701		222	1164		222	1506
	223	391		223	452		223	581		223	703		223	1165		223	1510
	224	396		224	453		224	589		224	705		224	1168		224	1512
	225	399		225	454		225	592		225	1006		225	1169		225	1513
	226	400		226	457		226	604		226	1008		226	1171		226	1514
	227	401		227	465		227	608		227	1011		227	1177		227	1525
	228	402		228	466		228	609		228	1015		228	1183		228	1527
	229	403		229	469		229	610		229	1018		229	1186		229	1530
	230	404		230	470		230	611		230	1020		230	1191		230	1533
	231	406		231	471		231	612		231	1023		231	1194		231	1535
	232	407		232	473		232	629		232	1031		232	1195		232	1536
	233	408		233	474		233	630		233	1042		233	1197		233	1541
	234	409		234	475		234	631		234	1043		234	1198		234	1545
	235	410		235	477		235	635		235	1044		235	1202		235	1550
	236	411		236	481		236	641		236	1045		236	1204		236	1553
	237	412		237	484		237	646		237	1049		237	1205		237	1561
	238	413		238	485		238	647		238	1051		238	1206		238	1572
	239	416		239	487		239	656		239	1053		239	1209		239	1576
	240	417		240	488		240	657		240	1054		240	1216		240	1585
	241	418		241	491		241	660		241	1055		241	1224		241	1591
	242	419		242	492		242	662		242	1056		242	1225		242	1592
	243	420		243	495		243	667		243	1058		243	1227		243	1594
	244	421		244	496		244	675		244	1060		244	1228		244	1599
	245	423		245	497		245	678		245	1061		245	1233		245	1602
	246	429		246	498		246	680		246	1062		246	1234		246	1603
	247	430		247	499		247	681		247	1064		247	1236		247	1604
	248	431		248	500		248	684		248	1065		248	1244		248	1605
	249	440		249	501		249	685		249	1071		249	1247		249	1620
	250	441		250	508		250	686		250	1072		250	1248		250	1621
	251	442		251	510		251	688		251	1076		251	1258		251	1622
	252	443		252	511		252	689		252	1091		252	1280		252	1630
	253	444		253	514		253	692		253	1098		253	1285		253	1632
	254	450		254	515		254	693		254	1100		254	1344		254	1635
	255	451		255	516		255	695		255	1103		255	1366		255	1636
	256	452		256	517		256	696		256	1105		256	1367		256	1654
	257	453		257	519		257	698		257	1110		257	1370		257	1665
	258	454		258	521		258	701		258	1114		258	1372		258	1667
	259	457		259	522		259	703		259	1119		259	1373		259	1672
	260	464		260	528		260	705		260	1120		260	1375		260	1682
	261	465		261	533		261	1006		261	1131		261	1380		261	1686
	262	466		262	534		262	1008		262	1139		262	1381		262	1691
	263	469		263	535		263	1011		263	1151		263	1385		263	1698
	264	470		264	536		264	1015		264	1155		264	1386		264	1699
	265	471		265	539		265	1018		265	1163		265	1392		265	1700
	266	473		266	540		266	1020		266	1164		266	1400		266	1701
	267	474		267	541		267	1023		267	1165		267	1402		267	1707
	268	475		268	545		268	1031		268	1168		268	1409		268	1709
	269	477		269	546		269	1042		269	1169		269	1412		269	1711
	270	478		270	547		270	1043		270	1171		270	1413		270	1715
	271	479		271	548		271	1044		271	1177		271	1420		271	1720
	272	480		272	551		272	1045		272	1182		272	1421		272	1725
	273	481		273	552		273	1049		273	1183		273	1436		273	1741
	274	484		274	553		274	1051		274	1184		274	1440		274	1747
	275	485		275	555		275	1053		275	1186		275	1444		275	1750
	276	487		276	556		276	1054		276	1191		276	1446		276	1774
	277	488		277	557		277	1055		277	1194		277	1448		277	1828
	278	491		278	558		278	1056		278	1195		278	1473		278	1829
	279	492		279	559		279	1058		279	1196		279	1475		279	1835
	280	495		280	560		280	1060		280	1197		280	1483		280	1839
	281	496		281	561		281	1061		281	1198		281	1487		281	1840
	282	497		282	563		282	1062		282	1200		282	1488		282	1851
	283	498		283	564		283	1064		283	1202		283	1491		283	1854
	284	499		284	565		284	1065		284	1204		284	1493		284	1858
	285	500		285	566		285	1071		285	1205		285	1494		285	1861
	286	501		286	568		286	1072		286	1206		286	1495		286	1865
	287	502		287	569		287	1076		287	1209		287	1496		287	1869
	288	508		288	571		288	1091		288	1215		288	1497		288	1875
	289	510		289	578		289	1092		289	1216		289	1499		289	1963
	290	511		290	579		290	1098		290	1224		290	1505		290	1972
	291	513		291	581		291	1100		291	1225		291	1506		291	1978
	292	514		292	587		292	1103		292	1227		292	1507		292	1982
	293	515		293	589		293	1105		293	1228		293	1510		293	1987
	294	516		294	592		294	1109		294	1233		294	1512		294	1993
	295	517		295	599		295	1110		295	1234		295	1513		295	1994
	296	519		296	600		296	1114		296	1236		296	1514		296	2000
	297	521		297	602		297	1119		297	1244		297	1523		297	2005
	298	522		298	604		298	1120		298	1247		298	1524		298	2026
	299	523		299	608		299	1131		299	1248		299	1525		299	2048
	300	528		300	609		300	1139		300	1256		300	1527		300	2050
	301	529		301	610		301	1151		301	1258		301	1530		301	2062
	302	530		302	611		302	1155		302	1280		302	1533		302	2065
	303	533		303	612		303	1163		303	1285		303	1535		303	2067
	304	534		304	627		304	1164		304	1344		304	1536		304	2069
	305	535		305	629		305	1165		305	1365		305	1541		305	2070
	306	536		306	630		306	1168		306	1366		306	1544		306	2078
	307	539		307	631		307	1169		307	1367		307	1545		307	2083
	308	540		308	633		308	1171		308	1370		308	1546		308	2087
	309	541		309	635		309	1177		309	1372		309	1550		309	2088
	310	545		310	641		310	1182		310	1373		310	1553		310	2089
	311	546		311	646		311	1183		311	1375		311	1560		311	2092
	312	547		312	647		312	1184		312	1380		312	1561		312	2093
	313	548		313	651		313	1186		313	1381		313	1562		313	2097
	314	551		314	656		314	1187		314	1385		314	1568		314	2108
	315	552		315	657		315	1191		315	1386		315	1572		315	2114
	316	553		316	660		316	1194		316	1392		316	1576		316	2116
	317	555		317	662		317	1195		317	1399		317	1584		317	2124
	318	556		318	663		318	1196		318	1400		318	1585		318	2126
	319	557		319	664		319	1197		319	1402		319	1588		319	2128
	320	558		320	667		320	1198		320	1409		320	1591		320	2129
	321	559		321	669		321	1200		321	1412		321	1592		321	2138
	322	560		322	671		322	1202		322	1413		322	1594		322	2146
	323	561		323	675		323	1204		323	1420		323	1599		323	2152
	324	563		324	676		324	1205		324	1421		324	1602		324	2178
	325	564		325	678		325	1206		325	1422		325	1603		325	2180
	326	565		326	680		326	1209		326	1423		326	1604		326	2182
	327	566		327	681		327	1215		327	1436		327	1605		327	2185
	328	568		328	684		328	1216		328	1439		328	1614		328	2187
	329	569		329	685		329	1223		329	1440		329	1619		329	2191
	330	571		330	686		330	1224		330	1444		330	1620		330	2192
	331	578		331	687		331	1225		331	1446		331	1621		331	2194
	332	579		332	688		332	1227		332	1448		332	1622		332	2197
	333	581		333	689		333	1228		333	1461		333	1626		333	2204
	334	587		334	692		334	1229		334	1473		334	1630		334	2210
	335	589		335	693		335	1230		335	1475		335	1632		335	2216
	336	592		336	695		336	1233		336	1478		336	1635		336	2225
	337	599		337	696		337	1234		337	1483		337	1636		337	2226
	338	600		338	697		338	1236		338	1487		338	1637		338	2227
	339	602		339	698		339	1237		339	1488		339	1654		339	2231
	340	603		340	701		340	1244		340	1491		340	1665		340	2237
	341	604		341	703		341	1246		341	1493		341	1667		341	2239
	342	608		342	705		342	1247		342	1494		342	1672		342	2245
	343	609		343	1006		343	1248		343	1495		343	1679		343	2251
	344	610		344	1008		344	1256		344	1496		344	1682		344	2259
	345	611		345	1009		345	1258		345	1497		345	1683		345	2260
	346	612		346	1011		346	1280		346	1499		346	1686		346	2263
	347	627		347	1012		347	1285		347	1504		347	1691		347	2272
	348	629		348	1015		348	1344		348	1505		348	1698		348	2277
	349	630		349	1016		349	1365		349	1506		349	1699		349	2283
	350	631		350	1018		350	1366		350	1507		350	1700		350	2284
	351	633		351	1019		351	1367		351	1510		351	1701		351	2295
	352	635		352	1020		352	1370		352	1512		352	1705		352	2297
	353	639		353	1022		353	1372		353	1513		353	1707		353	2309
	354	641		354	1023		354	1373		354	1514		354	1709		354	2314
	355	643		355	1026		355	1374		355	1517		355	1711		355	2327
	356	646		356	1031		356	1375		356	1518		356	1715		356	2328
	357	647		357	1037		357	1380		357	1523		357	1720		357	2334
	358	648		358	1038		358	1381		358	1524		358	1725		358	2338
	359	650		359	1041		359	1385		359	1525		359	1741		359	2340
	360	651		360	1042		360	1386		360	1527		360	1744		360	2342
	361	652		361	1043		361	1392		361	1530		361	1747		361	2343
	362	653		362	1044		362	1393		362	1533		362	1750		362	2346
	363	654		363	1045		363	1397		363	1535		363	1774		363	2349
	364	656		364	1046		364	1399		364	1536		364	1828		364	2350
	365	657		365	1049		365	1400		365	1539		365	1829		365	2358
	366	658		366	1051		366	1402		366	1541		366	1835		366	2364
	367	660		367	1053		367	1409		367	1544		367	1839		367	2367
	368	662		368	1054		368	1412		368	1545		368	1840		368	2369
	369	663		369	1055		369	1413		369	1546		369	1851
	370	664		370	1056		370	1415		370	1549		370	1852
	371	667		371	1058		371	1420		371	1550		371	1853
	372	668		372	1059		372	1421		372	1552		372	1854
	373	669		373	1060		373	1422		373	1553		373	1858
	374	671		374	1061		374	1423		374	1560		374	1861
	375	673		375	1062		375	1436		375	1561		375	1862
	376	675		376	1064		376	1438		376	1562		376	1863
	377	676		377	1065		377	1439		377	1568		377	1865
	378	678		378	1071		378	1440		378	1572		378	1869
	379	679		379	1072		379	1444		379	1576		379	1875
	380	680		380	1076		380	1446		380	1584		380	1885
	381	681		381	1082		381	1448		381	1585		381	1920
	382	684		382	1091		382	1461		382	1586		382	1923
	383	685		383	1092		383	1468		383	1588		383	1963
	384	686		384	1098		384	1473		384	1591		384	1968
	385	687		385	1100		385	1475		385	1592		385	1972
	386	688		386	1101		386	1478		386	1594		386	1974
	387	689		387	1103		387	1483		387	1596		387	1978
	388	692		388	1105		388	1486		388	1599		388	1980
	389	693		389	1109		389	1487		389	1601		389	1982
	390	695		390	1110		390	1488		390	1602		390	1987
	391	696		391	1112		391	1489		391	1603		391	1990
	392	697		392	1114		392	1491		392	1604		392	1993
	393	698		393	1115		393	1493		393	1605		393	1994
	394	701		394	1116		394	1494		394	1612		394	2000
	395	702		395	1119		395	1495		395	1614		395	2005
	396	703		396	1120		396	1496		396	1619		396	2020
	397	705		397	1123		397	1497		397	1620		397	2022
	398	1006		398	1128		398	1499		398	1621		398	2026
	399	1008		399	1131		399	1504		399	1622		399	2028
	400	1009		400	1139		400	1505		400	1626		400	2048
	401	1010		401	1142		401	1506		401	1630		401	2050
	402	1011		402	1151		402	1507		402	1632		402	2051
	403	1012		403	1152		403	1510		403	1635		403	2055
	404	1015		404	1155		404	1512		404	1636		404	2056
	405	1016		405	1158		405	1513		405	1637		405	2062
	406	1018		406	1159		406	1514		406	1646		406	2065
	407	1019		407	1163		407	1517		407	1647		407	2067
	408	1020		408	1164		408	1518		408	1651		408	2069
	409	1021		409	1165		409	1520		409	1654		409	2070
	410	1022		410	1166		410	1522		410	1665		410	2073
	411	1023		411	1168		411	1523		411	1666		411	2078
	412	1024		412	1169		412	1524		412	1667		412	2083
	413	1025		413	1170		413	1525		413	1672		413	2085
	414	1026		414	1171		414	1526		414	1679		414	2087
	415	1031		415	1172		415	1527		415	1682		415	2088
	416	1036		416	1175		416	1530		416	1683		416	2089
	417	1037		417	1177		417	1533		417	1686		417	2092
	418	1038		418	1179		418	1535		418	1691		418	2093
	419	1041		419	1180		419	1536		419	1698		419	2096
	420	1042		420	1182		420	1539		420	1699		420	2097
	421	1043		421	1183		421	1541		421	1700		421	2099
	422	1044		422	1184		422	1544		422	1701		422	2102
	423	1045		423	1186		423	1545		423	1705		423	2108
	424	1046		424	1187		424	1546		424	1707		424	2110
	425	1049		425	1188		425	1548		425	1708		425	2114
	426	1051		426	1190		426	1549		426	1709		426	2116
	427	1052		427	1191		427	1550		427	1711		427	2124
	428	1053		428	1192		428	1552		428	1715		428	2126
	429	1054		429	1194		429	1553		429	1720		429	2128
	430	1055		430	1195		430	1560		430	1725		430	2129
	431	1056		431	1196		431	1561		431	1727		431	2131
	432	1058		432	1197		432	1562		432	1741		432	2134
	433	1059		433	1198		433	1568		433	1744		433	2138
	434	1060		434	1200		434	1570		434	1747		434	2146
	435	1061		435	1202		435	1572		435	1750		435	2151
	436	1062		436	1204		436	1576		436	1774		436	2152
	437	1064		437	1205		437	1584		437	1814		437	2157
	438	1065		438	1206		438	1585		438	1828		438	2158
	439	1071		439	1208		439	1586		439	1829		439	2162
	440	1072		440	1209		440	1588		440	1835		440	2174
	441	1073		441	1211		441	1591		441	1839		441	2178
	442	1076		442	1215		442	1592		442	1840		442	2180
	443	1082		443	1216		443	1594		443	1851		443	2182
	444	1088		444	1217		444	1596		444	1852		444	2185
	445	1091		445	1220		445	1597		445	1853		445	2186
	446	1092		446	1222		446	1599		446	1854		446	2187
	447	1098		447	1223		447	1601		447	1858		447	2188
	448	1100		448	1224		448	1602		448	1861		448	2189
	449	1101		449	1225		449	1603		449	1862		449	2191
	450	1103		450	1226		450	1604		450	1863		450	2192
	451	1105		451	1227		451	1605		451	1865		451	2194
	452	1109		452	1228		452	1612		452	1869		452	2197
	453	1110		453	1229		453	1614		453	1875		453	2203
	454	1112		454	1230		454	1615		454	1885		454	2204
	455	1114		455	1231		455	1619		455	1920		455	2209
	456	1115		456	1233		456	1620		456	1923		456	2210
	457	1116		457	1234		457	1621		457	1962		457	2214
	458	1118		458	1236		458	1622		458	1963		458	2215
	459	1119		459	1237		459	1626		459	1968		459	2216
	460	1120		460	1238		460	1630		460	1972		460	2225
	461	1123		461	1242		461	1632		461	1974		461	2226
	462	1126		462	1243		462	1635		462	1978		462	2227
	463	1128		463	1244		463	1636		463	1980		463	2231
	464	1130		464	1246		464	1637		464	1982		464	2232
	465	1131		465	1247		465	1638		465	1983		465	2237
	466	1132		466	1248		466	1646		466	1985		466	2239
	467	1135		467	1249		467	1647		467	1987		467	2243
	468	1139		468	1256		468	1651		468	1990		468	2245
	469	1142		469	1258		469	1652		469	1991		469	2251
	470	1151		470	1280		470	1654		470	1993		470	2254
	471	1152		471	1285		471	1665		471	1994		471	2259
	472	1155		472	1288		472	1666		472	2000		472	2260
	473	1158		473	1328		473	1667		473	2005		473	2263
	474	1159		474	1344		474	1670		474	2020		474	2268
	475	1163		475	1365		475	1672		475	2022		475	2272
	476	1164		476	1366		476	1679		476	2023		476	2277
	477	1165		477	1367		477	1682		477	2026		477	2278
	478	1166		478	1369		478	1683		478	2028		478	2283
	479	1168		479	1370		479	1686		479	2032		479	2284
	480	1169		480	1372		480	1691		480	2048		480	2293
	481	1170		481	1373		481	1698		481	2050		481	2295
	482	1171		482	1374		482	1699		482	2051		482	2296
	483	1172		483	1375		483	1700		483	2054		483	2297
	484	1175		484	1376		484	1701		484	2055		484	2309
	485	1177		485	1378		485	1705		485	2056		485	2314
	486	1178		486	1380		486	1707		486	2060		486	2327
	487	1179		487	1381		487	1708		487	2062		487	2328
	488	1180		488	1382		488	1709		488	2065		488	2334
	489	1182		489	1385		489	1711		489	2067		489	2338
	490	1183		490	1386		490	1715		490	2069		490	2340
	491	1184		491	1392		491	1720		491	2070		491	2342
	492	1185		492	1393		492	1722		492	2071		492	2343
	493	1186		493	1394		493	1725		493	2073		493	2346
	494	1187		494	1395		494	1727		494	2078		494	2349
	495	1188		495	1397		495	1730		495	2083		495	2350
	496	1189		496	1399		496	1733		496	2085		496	2353
	497	1190		497	1400		497	1736		497	2087		497	2358
	498	1191		498	1401		498	1738		498	2088		498	2364
	499	1192		499	1402		499	1741		499	2089		499	2365
	500	1193		500	1407		500	1742		500	2092		500	2367
	501	1194		501	1409		501	1744		501	2093		501	2369
	502	1195		502	1412		502	1745		502	2094
	503	1196		503	1413		503	1747		503	2096
	504	1197		504	1415		504	1750		504	2097
	505	1198		505	1420		505	1755		505	2099
	506	1199		506	1421		506	1758		506	2102
	507	1200		507	1422		507	1759		507	2108
	508	1202		508	1423		508	1762		508	2109
	509	1204		509	1425		509	1764		509	2110
	510	1205		510	1431		510	1765		510	2114
	511	1206		511	1432		511	1774		511	2116
	512	1208		512	1434		512	1780		512	2124
	513	1209		513	1436		513	1790		513	2126
	514	1211		514	1438		514	1802		514	2128
	515	1215		515	1439		515	1804		515	2129
	516	1216		516	1440		516	1814		516	2131
	517	1217		517	1441		517	1819		517	2134
	518	1218		518	1443		518	1822		518	2138
	519	1219		519	1444		519	1827		519	2140
	520	1220		520	1446		520	1828		520	2146
	521	1222		521	1447		521	1829		521	2151
	522	1223		522	1448		522	1830		522	2152
	523	1224		523	1461		523	1831		523	2157
	524	1225		524	1468		524	1833		524	2158
	525	1226		525	1473		525	1834		525	2159
	526	1227		526	1475		526	1835		526	2162
	527	1228		527	1478		527	1837		527	2170
	528	1229		528	1483		528	1839		528	2171
	529	1230		529	1486		529	1840		529	2174
	530	1231		530	1487		530	1851		530	2178
	531	1233		531	1488		531	1852		531	2180
	532	1234		532	1489		532	1853		532	2182
	533	1235		533	1491		533	1854		533	2185
	534	1236		534	1493		534	1858		534	2186
	535	1237		535	1494		535	1861		535	2187
	536	1238		536	1495		536	1862		536	2188
	537	1242		537	1496		537	1863		537	2189
	538	1243		538	1497		538	1865		538	2191
	539	1244		539	1499		539	1869		539	2192
	540	1245		540	1504		540	1875		540	2194
	541	1246		541	1505		541	1885		541	2197
	542	1247		542	1506		542	1920		542	2203
	543	1248		543	1507		543	1923		543	2204
	544	1249		544	1510		544	1962		544	2207
	545	1253		545	1512		545	1963		545	2209
	546	1256		546	1513		546	1968		546	2210
	547	1258		547	1514		547	1972		547	2214
	548	1259		548	1515		548	1974		548	2215
	549	1260		549	1516		549	1977		549	2216
	550	1261		550	1517		550	1978		550	2220
	551	1262		551	1518		551	1980		551	2225
	552	1263		552	1520		552	1982		552	2226
	553	1264		553	1522		553	1983		553	2227
	554	1265		554	1523		554	1985		554	2229
	555	1266		555	1524		555	1987		555	2231
	556	1267		556	1525		556	1990		556	2232
	557	1268		557	1526		557	1991		557	2234
	558	1269		558	1527		558	1993		558	2237
	559	1270		559	1528		559	1994		559	2239
	560	1271		560	1530		560	2000		560	2243
	561	1272		561	1533		561	2005		561	2245
	562	1273		562	1535		562	2011		562	2251
	563	1274		563	1536		563	2020		563	2254
	564	1276		564	1539		564	2022		564	2259
	565	1277		565	1540		565	2023		565	2260
	566	1278		566	1541		566	2026		566	2263
	567	1280		567	1544		567	2028		567	2265
	568	1281		568	1545		568	2032		568	2266
	569	1282		569	1546		569	2048		569	2268
	570	1283		570	1548		570	2049		570	2272
	571	1285		571	1549		571	2050		571	2277
	572	1286		572	1550		572	2051		572	2278
	573	1288		573	1551		573	2054		573	2281
	574	1323		574	1552		574	2055		574	2283
	575	1325		575	1553		575	2056		575	2284
	576	1328		576	1560		576	2057		576	2286
	577	1343		577	1561		577	2060		577	2293
	578	1344		578	1562		578	2062		578	2295
	579	1350		579	1563		579	2065		579	2296
	580	1352		580	1564		580	2067		580	2297
	581	1353		581	1565		581	2069		581	2309
	582	1354		582	1566		582	2070		582	2314
	583	1356		583	1568		583	2071		583	2322
	584	1361		584	1569		584	2073		584	2327
	585	1363		585	1570		585	2078		585	2328
	586	1365		586	1571		586	2083		586	2334
	587	1366		587	1572		587	2085		587	2338
	588	1367		588	1573		588	2087		588	2340
	589	1369		589	1575		589	2088		589	2342
	590	1370		590	1576		590	2089		590	2343
	591	1371		591	1584		591	2092		591	2346
	592	1372		592	1585		592	2093		592	2349
	593	1373		593	1586		593	2094		593	2350
	594	1374		594	1588		594	2095		594	2353
	595	1375		595	1590		595	2096		595	2358
	596	1376		596	1591		596	2097		596	2360
	597	1378		597	1592		597	2099		597	2364
	598	1380		598	1594		598	2102		598	2365
	599	1381		599	1596		599	2108		599	2367
	600	1382		600	1597		600	2109		600	2369
	601	1385		601	1599		601	2110		601	2373
	602	1386		602	1601		602	2114		602	2377
	603	1389		603	1602		603	2116		603	2378
	604	1392		604	1603		604	2119		604	2380
	605	1393		605	1604		605	2124		605	2381
	606	1394		606	1605		606	2126
	607	1395		607	1607		607	2128
	608	1397		608	1609		608	2129
	609	1399		609	1612		609	2131
	610	1400		610	1614		610	2134
	611	1401		611	1615		611	2135
	612	1402		612	1616		612	2138
	613	1407		613	1619		613	2140
	614	1408		614	1620		614	2146
	615	1409		615	1621		615	2150
	616	1411		616	1622		616	2151
	617	1412		617	1626		617	2152
	618	1413		618	1630		618	2157
	619	1415		619	1631		619	2158
	620	1419		620	1632		620	2159
	621	1420		621	1635		621	2162
	622	1421		622	1636		622	2170
	623	1422		623	1637		623	2171
	624	1423		624	1638		624	2174
	625	1425		625	1646		625	2178
	626	1431		626	1647		626	2180
	627	1432		627	1651		627	2182
	628	1433		628	1652		628	2185
	629	1434		629	1654		629	2186
	630	1436		630	1664		630	2187
	631	1437		631	1665		631	2188
	632	1438		632	1666		632	2189
	633	1439		633	1667		633	2191
	634	1440		634	1670		634	2192
	635	1441		635	1671		635	2194
	636	1443		636	1672		636	2197
	637	1444		637	1679		637	2198
	638	1446		638	1680		638	2203
	639	1447		639	1681		639	2204
	640	1448		640	1682		640	2205
	641	1449		641	1683		641	2207
	642	1461		642	1686		642	2209
	643	1466		643	1691		643	2210
	644	1468		644	1696		644	2214
	645	1473		645	1698		645	2215
	646	1475		646	1699		646	2216
	647	1478		647	1700		647	2217
	648	1479		648	1701		648	2220
	649	1483		649	1705		649	2222
	650	1486		650	1707		650	2225
	651	1487		651	1708		651	2226
	652	1488		652	1709		652	2227
	653	1489		653	1711		653	2229
	654	1490		654	1714		654	2231
	655	1491		655	1715		655	2232
	656	1493		656	1720		656	2234
	657	1494		657	1722		657	2237
	658	1495		658	1725		658	2239
	659	1496		659	1727		659	2243
	660	1497		660	1730		660	2245
	661	1499		661	1731		661	2251
	662	1504		662	1733		662	2254
	663	1505		663	1735		663	2256
	664	1506		664	1736		664	2259
	665	1507		665	1738		665	2260
	666	1510		666	1741		666	2263
	667	1512		667	1742		667	2265
	668	1513		668	1743		668	2266
	669	1514		669	1744		669	2268
	670	1515		670	1745		670	2270
	671	1516		671	1747		671	2272
	672	1517		672	1750		672	2277
	673	1518		673	1755		673	2278
	674	1519		674	1758		674	2281
	675	1520		675	1759		675	2283
	676	1521		676	1761		676	2284
	677	1522		677	1762		677	2286
	678	1523		678	1764		678	2293
	679	1524		679	1765		679	2295
	680	1525		680	1766		680	2296
	681	1526		681	1768		681	2297
	682	1527		682	1769		682	2309
	683	1528		683	1770		683	2314
	684	1529		684	1771		684	2322
	685	1530		685	1772		685	2327
	686	1533		686	1773		686	2328
	687	1535		687	1774		687	2334
	688	1536		688	1775		688	2338
	689	1539		689	1776		689	2340
	690	1540		690	1779		690	2342
	691	1541		691	1780		691	2343
	692	1542		692	1783		692	2346
	693	1543		693	1784		693	2349
	694	1544		694	1785		694	2350
	695	1545		695	1788		695	2353
	696	1546		696	1789		696	2356
	697	1547		697	1790		697	2358
	698	1548		698	1791		698	2360
	699	1549		699	1792		699	2364
	700	1550		700	1793		700	2365
	701	1551		701	1794		701	2366
	702	1552		702	1796		702	2367
	703	1553		703	1798		703	2369
	704	1560		704	1801		704	2373
	705	1561		705	1802		705	2377
	706	1562		706	1804		706	2378
	707	1563		707	1805		707	2380
	708	1564		708	1806		708	2381
	709	1565		709	1807
	710	1566		710	1808
	711	1568		711	1809
	712	1569		712	1811
	713	1570		713	1812
	714	1571		714	1814
	715	1572		715	1818
	716	1573		716	1819
	717	1574		717	1821
	718	1575		718	1822
	719	1576		719	1824
	720	1580		720	1825
	721	1582		721	1827
	722	1584		722	1828
	723	1585		723	1829
	724	1586		724	1830
	725	1588		725	1831
	726	1590		726	1833
	727	1591		727	1834
	728	1592		728	1835
	729	1593		729	1837
	730	1594		730	1839
	731	1596		731	1840
	732	1597		732	1845
	733	1598		733	1849
	734	1599		734	1851
	735	1600		735	1852
	736	1601		736	1853
	737	1602		737	1854
	738	1603		738	1855
	739	1604		739	1858
	740	1605		740	1859
	741	1607		741	1861
	742	1609		742	1862
	743	1611		743	1863
	744	1612		744	1865
	745	1614		745	1869
	746	1615		746	1875
	747	1616		747	1885
	748	1617		748	1918
	749	1619		749	1920
	750	1620		750	1923
	751	1621		751	1962
	752	1622		752	1963
	753	1626		753	1964
	754	1630		754	1966
	755	1631		755	1968
	756	1632		756	1972
	757	1635		757	1974
	758	1636		758	1977
	759	1637		759	1978
	760	1638		760	1980
	761	1641		761	1981
	762	1643		762	1982
	763	1644		763	1983
	764	1646		764	1985
	765	1647		765	1987
	766	1651		766	1990
	767	1652		767	1991
	768	1654		768	1993
	769	1664		769	1994
	770	1665		770	1995
	771	1666		771	1997
	772	1667		772	2000
	773	1668		773	2001
	774	1669		774	2005
	775	1670		775	2011
	776	1671		776	2014
	777	1672		777	2017
	778	1679		778	2020
	779	1680		779	2022
	780	1681		780	2023
	781	1682		781	2026
	782	1683		782	2028
	783	1685		783	2032
	784	1686		784	2034
	785	1691		785	2038
	786	1696		786	2048
	787	1697		787	2049
	788	1698		788	2050
	789	1699		789	2051
	790	1700		790	2052
	791	1701		791	2053
	792	1705		792	2054
	793	1707		793	2055
	794	1708		794	2056
	795	1709		795	2057
	796	1711		796	2058
	797	1714		797	2060
	798	1715		798	2062
	799	1720		799	2065
	800	1722		800	2067
	801	1725		801	2069
	802	1726		802	2070
	803	1727		803	2071
	804	1730		804	2073
	805	1731		805	2078
	806	1733		806	2083
	807	1735		807	2085
	808	1736		808	2087
	809	1738		809	2088
	810	1741		810	2089
	811	1742		811	2092
	812	1743		812	2093
	813	1744		813	2094
	814	1745		814	2095
	815	1746		815	2096
	816	1747		816	2097
	817	1750		817	2099
	818	1752		818	2100
	819	1755		819	2102
	820	1758		820	2108
	821	1759		821	2109
	822	1761		822	2110
	823	1762		823	2114
	824	1763		824	2115
	825	1764		825	2116
	826	1765		826	2119
	827	1766		827	2120
	828	1768		828	2124
	829	1769		829	2125
	830	1770		830	2126
	831	1771		831	2127
	832	1772		832	2128
	833	1773		833	2129
	834	1774		834	2130
	835	1775		835	2131
	836	1776		836	2134
	837	1778		837	2135
	838	1779		838	2136
	839	1780		839	2137
	840	1782		840	2138
	841	1783		841	2140
	842	1784		842	2146
	843	1785		843	2150
	844	1787		844	2151
	845	1788		845	2152
	846	1789		846	2155
	847	1790		847	2157
	848	1791		848	2158
	849	1792		849	2159
	850	1793		850	2161
	851	1794		851	2162
	852	1795		852	2170
	853	1796		853	2171
	854	1797		854	2174
	855	1798		855	2176
	856	1799		856	2178
	857	1801		857	2180
	858	1802		858	2182
	859	1804		859	2183
	860	1805		860	2185
	861	1806		861	2186
	862	1807		862	2187
	863	1808		863	2188
	864	1809		864	2189
	865	1811		865	2191
	866	1812		866	2192
	867	1814		867	2193
	868	1818		868	2194
	869	1819		869	2197
	870	1821		870	2198
	871	1822		871	2203
	872	1823		872	2204
	873	1824		873	2205
	874	1825		874	2207
	875	1827		875	2208
	876	1828		876	2209
	877	1829		877	2210
	878	1830		878	2214
	879	1831		879	2215
	880	1833		880	2216
	881	1834		881	2217
	882	1835		882	2220
	883	1837		883	2221
	884	1839		884	2222
	885	1840		885	2225
	886	1845		886	2226
	887	1849		887	2227
	888	1851		888	2228
	889	1852		889	2229
	890	1853		890	2231
	891	1854		891	2232
	892	1855		892	2234
	893	1858		893	2237
	894	1859		894	2239
	895	1861		895	2241
	896	1862		896	2243
	897	1863		897	2245
	898	1864		898	2250
	899	1865		899	2251
	900	1866		900	2252
	901	1869		901	2254
	902	1870		902	2256
	903	1872		903	2259
	904	1873		904	2260
	905	1874		905	2263
	906	1875		906	2265
	907	1876		907	2266
	908	1877		908	2268
	909	1878		909	2270
	910	1879		910	2272
	911	1880		911	2274
	912	1881		912	2277
	913	1882		913	2278
	914	1883		914	2279
	915	1884		915	2281
	916	1885		916	2283
	917	1887		917	2284
	918	1888		918	2285
	919	1889		919	2286
	920	1890		920	2293
	921	1892		921	2295
	922	1895		922	2296
	923	1896		923	2297
	924	1905		924	2309
	925	1910		925	2314
	926	1914		926	2319
	927	1918		927	2322
	928	1920		928	2327
	929	1921		929	2328
	930	1923		930	2334
	931	1927		931	2338
	932	1928		932	2340
	933	1931		933	2342
	934	1939		934	2343
	935	1959		935	2346
	936	1960		936	2348
	937	1962		937	2349
	938	1963		938	2350
	939	1964		939	2353
	940	1966		940	2355
	941	1968		941	2356
	942	1971		942	2358
	943	1972		943	2359
	944	1974		944	2360
	945	1977		945	2364
	946	1978		946	2365
	947	1980		947	2366
	948	1981		948	2367
	949	1982		949	2369
	950	1983		950	2370
	951	1985		951	2373
	952	1986		952	2377
	953	1987		953	2378
	954	1988		954	2380
	955	1990		955	2381
	956	1991
	957	1992
	958	1993
	959	1994
	960	1995
	961	1996
	962	1997
	963	2000
	964	2001
	965	2003
	966	2005
	967	2009
	968	2011
	969	2014
	970	2017
	971	2020
	972	2022
	973	2023
	974	2024
	975	2026
	976	2028
	977	2032
	978	2034
	979	2035
	980	2038
	981	2048
	982	2049
	983	2050
	984	2051
	985	2052
	986	2053
	987	2054
	988	2055
	989	2056
	990	2057
	991	2058
	992	2060
	993	2062
	994	2065
	995	2067
	996	2069
	997	2070
	998	2071
	999	2073
	1000	2076
	1001	2077
	1002	2078
	1003	2080
	1004	2083
	1005	2085
	1006	2087
	1007	2088
	1008	2089
	1009	2090
	1010	2092
	1011	2093
	1012	2094
	1013	2095
	1014	2096
	1015	2097
	1016	2099
	1017	2100
	1018	2102
	1019	2108
	1020	2109
	1021	2110
	1022	2114
	1023	2115
	1024	2116
	1025	2117
	1026	2119
	1027	2120
	1028	2121
	1029	2122
	1030	2124
	1031	2125
	1032	2126
	1033	2127
	1034	2128
	1035	2129
	1036	2130
	1037	2131
	1038	2134
	1039	2135
	1040	2136
	1041	2137
	1042	2138
	1043	2140
	1044	2142
	1045	2146
	1046	2150
	1047	2151
	1048	2152
	1049	2154
	1050	2155
	1051	2157
	1052	2158
	1053	2159
	1054	2161
	1055	2162
	1056	2170
	1057	2171
	1058	2172
	1059	2173
	1060	2174
	1061	2176
	1062	2178
	1063	2179
	1064	2180
	1065	2181
	1066	2182
	1067	2183
	1068	2185
	1069	2186
	1070	2187
	1071	2188
	1072	2189
	1073	2191
	1074	2192
	1075	2193
	1076	2194
	1077	2197
	1078	2198
	1079	2203
	1080	2204
	1081	2205
	1082	2207
	1083	2208
	1084	2209
	1085	2210
	1086	2211
	1087	2213
	1088	2214
	1089	2215
	1090	2216
	1091	2217
	1092	2220
	1093	2221
	1094	2222
	1095	2224
	1096	2225
	1097	2226
	1098	2227
	1099	2228
	1100	2229
	1101	2230
	1102	2231
	1103	2232
	1104	2234
	1105	2237
	1106	2239
	1107	2241
	1108	2243
	1109	2245
	1110	2247
	1111	2249
	1112	2250
	1113	2251
	1114	2252
	1115	2254
	1116	2256
	1117	2259
	1118	2260
	1119	2263
	1120	2265
	1121	2266
	1122	2268
	1123	2270
	1124	2271
	1125	2272
	1126	2274
	1127	2275
	1128	2277
	1129	2278
	1130	2279
	1131	2281
	1132	2283
	1133	2284
	1134	2285
	1135	2286
	1136	2290
	1137	2293
	1138	2295
	1139	2296
	1140	2297
	1141	2309
	1142	2311
	1143	2313
	1144	2314
	1145	2315
	1146	2319
	1147	2322
	1148	2325
	1149	2327
	1150	2328
	1151	2329
	1152	2334
	1153	2338
	1154	2340
	1155	2342
	1156	2343
	1157	2344
	1158	2346
	1159	2347
	1160	2348
	1161	2349
	1162	2350
	1163	2353
	1164	2355
	1165	2356
	1166	2358
	1167	2359
	1168	2360
	1169	2364
	1170	2365
	1171	2366
	1172	2367
	1173	2369
	1174	2370
	1175	2372
	1176	2373
	1177	2374
	1178	2377
	1179	2378
	1180	2380
	1181	2381
