# Supplementary material for: FOCuS: a metaheuristic algorithm for computing knockouts from genome-scale models for strain optimization
Source: Royal Society of Chemistry journal article supplement (doi:10.1039/c7mb00204a), 2017-05-08
Supplement: c7mb00204a4.xlsx [file c7mb00204a4.xlsx]

## Sheet: Sheet1
Sections			20			20			20
Generations			3			3			3
Iterations			1			2			2
Time (minutes)			20-25			20-25			20-25
		Counter	Rxn_index		Counter	Rxn_index		Counter	Rxn_index
		1	1		1	1		1	1
		2	2		2	2		2	2
		3	4		3	4		3	8
		4	8		4	8		4	35
		5	35		5	35		5	76
		6	43		6	61		6	79
		7	60		7	76		7	80
		8	61		8	79		8	82
		9	73		9	80		9	92
		10	75		10	81		10	96
		11	76		11	82		11	98
		12	79		12	92		12	103
		13	80		13	96		13	106
		14	81		14	98		14	107
		15	82		15	103		15	109
		16	92		16	106		16	112
		17	96		17	107		17	113
		18	98		18	109		18	117
		19	100		19	112		19	131
		20	103		20	113		20	132
		21	106		21	117		21	139
		22	107		22	127		22	148
		23	109		23	131		23	153
		24	112		24	132		24	174
		25	113		25	133		25	175
		26	117		26	139		26	185
		27	127		27	148		27	188
		28	131		28	153		28	193
		29	132		29	162		29	199
		30	133		30	166		30	201
		31	139		31	174		31	208
		32	148		32	175		32	215
		33	153		33	176		33	223
		34	162		34	185		34	228
		35	166		35	188		35	237
		36	167		36	193		36	247
		37	174		37	199		37	254
		38	175		38	201		38	258
		39	176		39	202		39	268
		40	177		40	208		40	271
		41	185		41	215		41	274
		42	188		42	217		42	283
		43	193		43	223		43	284
		44	194		44	228		44	286
		45	197		45	237		45	291
		46	199		46	247		46	298
		47	200		47	250		47	301
		48	201		48	254		48	302
		49	202		49	258		49	303
		50	208		50	268		50	308
		51	215		51	271		51	312
		52	217		52	272		52	318
		53	223		53	274		53	325
		54	228		54	283		54	354
		55	231		55	284		55	355
		56	233		56	286		56	364
		57	236		57	291		57	381
		58	237		58	297		58	401
		59	247		59	298		59	409
		60	250		60	301		60	410
		61	253		61	302		61	430
		62	254		62	303		62	444
		63	258		63	306		63	446
		64	264		64	307		64	453
		65	268		65	308		65	454
		66	271		66	312		66	460
		67	272		67	318		67	463
		68	274		68	325		68	466
		69	283		69	348		69	467
		70	284		70	352		70	470
		71	286		71	354		71	472
		72	291		72	355		72	665
		73	297		73	362		73	667
		74	298		74	364		74	668
		75	301		75	368		75	671
		76	302		76	369		76	678
		77	303		77	370		77	681
		78	306		78	373		78	683
		79	307		79	381		79	684
		80	308		80	401		80	685
		81	312		81	409		81	691
		82	314		82	410		82	693
		83	318		83	411		83	694
		84	325		84	424		84	695
		85	348		85	430		85	699
		86	352		86	432		86	700
		87	354		87	437		87	701
		88	355		88	444		88	702
		89	362		89	446		89	703
		90	364		90	453		90	706
		91	365		91	454		91	720
		92	368		92	460		92	723
		93	369		93	463		93	743
		94	370		94	466		94	762
		95	373		95	467		95	767
		96	381		96	470		96	770
		97	387		97	472		97	785
		98	393		98	473		98	787
		99	401		99	477		99	790
		100	409		100	665		100	795
		101	410		101	667		101	801
		102	411		102	668		102	811
		103	419		103	671		103	818
		104	424		104	673		104	838
		105	430		105	674		105	848
		106	432		106	678		106	856
		107	433		107	681		107	858
		108	437		108	682		108	860
		109	441		109	683		109	862
		110	444		110	684		110	870
		111	446		111	685		111	875
		112	453		112	689		112	878
		113	454		113	691		113	879
		114	457		114	693		114	881
		115	460		115	694		115	883
		116	463		116	695		116	902
		117	464		117	696		117	903
		118	466		118	699		118	908
		119	467		119	700		119	922
		120	470		120	701		120	929
		121	472		121	702		121	944
		122	473		122	703		122	947
		123	477		123	706		123	964
		124	659		124	713		124	975
		125	665		125	720		125	987
		126	667		126	723		126	997
		127	668		127	733		127	1004
		128	671		128	743		128	1014
		129	673		129	762		129	1015
		130	674		130	767		130	1024
		131	678		131	770		131	1028
		132	681		132	780		132	1033
		133	682		133	785		133	1037
		134	683		134	787		134	1038
		135	684		135	790		135	1048
		136	685		136	795		136	1058
		137	688		137	796		137	1059
		138	689		138	801		138	1072
		139	691		139	811		139	1079
		140	693		140	818		140	1097
		141	694		141	830		141	1104
		142	695		142	832		142	1118
		143	696		143	834		143	1127
		144	699		144	838		144	1136
		145	700		145	848		145	1146
		146	701		146	856		146	1148
		147	702		147	858		147	1187
		148	703		148	860		148	1189
		149	706		149	862		149	1209
		150	712		150	866		150	1229
		151	713		151	870		151	1232
		152	720		152	875		152	1236
		153	723		153	877		153	1238
		154	733		154	878		154	1249
		155	743		155	879		155	1263
		156	752		156	881		156	1264
		157	759		157	883		157	1270
		158	762		158	902		158	1272
		159	767		159	903		159	1284
		160	768		160	908		160	1286
		161	770		161	913		161	1306
		162	779		162	922		162	1324
		163	780		163	929		163	1349
		164	785		164	932		164	1350
		165	787		165	937		165	1351
		166	790		166	944		166	1360
		167	795		167	947		167	1363
		168	796		168	964		168	1364
		169	797		169	970		169	1366
		170	801		170	975		170	1375
		171	810		171	987		171	1399
		172	811		172	989		172	1400
		173	818		173	992		173	1403
		174	830		174	995		174	1414
		175	832		175	997		175	1423
		176	834		176	1004		176	1430
		177	838		177	1014		177	1434
		178	840		178	1015		178	1454
		179	848		179	1018		179	1458
		180	850		180	1021		180	1468
		181	851		181	1024		181	1471
		182	856		182	1028		182	1472
		183	857		183	1033		183	1478
		184	858		184	1037		184	1479
		185	860		185	1038		185	1484
		186	862		186	1048		186	1492
		187	864		187	1058		187	1522
		188	866		188	1059		188	1523
		189	870		189	1065		189	1532
		190	875		190	1072		190	1536
		191	877		191	1079		191	1545
		192	878		192	1093		192	1546
		193	879		193	1095		193	1550
		194	881		194	1097		194	1552
		195	883		195	1098		195	1555
		196	886		196	1104		196	1558
		197	887		197	1118		197	1563
		198	888		198	1127		198	1565
		199	889		199	1136		199	1573
		200	900		200	1138		200	1574
		201	902		201	1146
		202	903		202	1148
		203	908		203	1149
		204	913		204	1151
		205	922		205	1156
		206	929		206	1162
		207	932		207	1179
		208	937		208	1187
		209	941		209	1189
		210	942		210	1209
		211	944		211	1229
		212	947		212	1230
		213	964		213	1232
		214	970		214	1236
		215	975		215	1238
		216	987		216	1242
		217	989		217	1249
		218	992		218	1263
		219	994		219	1264
		220	995		220	1270
		221	997		221	1272
		222	1004		222	1275
		223	1014		223	1284
		224	1015		224	1286
		225	1018		225	1298
		226	1021		226	1299
		227	1024		227	1306
		228	1025		228	1324
		229	1028		229	1348
		230	1033		230	1349
		231	1037		231	1350
		232	1038		232	1351
		233	1044		233	1358
		234	1048		234	1360
		235	1058		235	1361
		236	1059		236	1363
		237	1060		237	1364
		238	1065		238	1365
		239	1072		239	1366
		240	1073		240	1370
		241	1074		241	1375
		242	1079		242	1399
		243	1082		243	1400
		244	1093		244	1403
		245	1095		245	1409
		246	1097		246	1414
		247	1098		247	1415
		248	1099		248	1421
		249	1103		249	1423
		250	1104		250	1430
		251	1107		251	1432
		252	1110		252	1434
		253	1118		253	1443
		254	1120		254	1454
		255	1127		255	1458
		256	1129		256	1468
		257	1136		257	1469
		258	1138		258	1471
		259	1146		259	1472
		260	1148		260	1473
		261	1149		261	1478
		262	1151		262	1479
		263	1153		263	1480
		264	1156		264	1484
		265	1158		265	1485
		266	1162		266	1492
		267	1177		267	1522
		268	1179		268	1523
		269	1187		269	1524
		270	1189		270	1532
		271	1209		271	1536
		272	1216		272	1545
		273	1229		273	1546
		274	1230		274	1547
		275	1232		275	1550
		276	1234		276	1552
		277	1236		277	1555
		278	1238		278	1558
		279	1242		279	1561
		280	1247		280	1563
		281	1249		281	1565
		282	1250		282	1572
		283	1259		283	1573
		284	1263		284	1574
		285	1264
		286	1270
		287	1272
		288	1273
		289	1275
		290	1283
		291	1284
		292	1286
		293	1294
		294	1298
		295	1299
		296	1306
		297	1324
		298	1325
		299	1332
		300	1347
		301	1348
		302	1349
		303	1350
		304	1351
		305	1356
		306	1358
		307	1360
		308	1361
		309	1362
		310	1363
		311	1364
		312	1365
		313	1366
		314	1370
		315	1375
		316	1385
		317	1397
		318	1399
		319	1400
		320	1403
		321	1409
		322	1414
		323	1415
		324	1420
		325	1421
		326	1423
		327	1430
		328	1432
		329	1433
		330	1434
		331	1443
		332	1454
		333	1458
		334	1468
		335	1469
		336	1470
		337	1471
		338	1472
		339	1473
		340	1478
		341	1479
		342	1480
		343	1484
		344	1485
		345	1492
		346	1505
		347	1508
		348	1509
		349	1516
		350	1522
		351	1523
		352	1524
		353	1525
		354	1527
		355	1532
		356	1535
		357	1536
		358	1545
		359	1546
		360	1547
		361	1550
		362	1552
		363	1555
		364	1558
		365	1561
		366	1563
		367	1565
		368	1572
		369	1573
		370	1574
